# Supplementary material for: NeuroCNVscore: a tissue-specific framework to prioritise the pathogenicity of CNVs in neurodevelopmental disorders
Source: PubMed Central journal article supplement — BMJ Paediatr Open. 2023 Jul 5;7(1):e001966. doi: 10.1136/bmjpo-2023-001966 (PMC10335557; doi:10.1136/bmjpo-2023-001966), 2023-07-05
Supplement: bmjpo-2023-001966.draft_revisions.pdf [file bmjpo-2023-001966.draft_revisions.pdf]

# BMJ Paediatrics Open

BMJ Paediatrics Open is committed to open peer review. As part of this commitment we make the peer review history of every article we publish publicly available.

When an article is published we post the peer reviewers' comments and the authors' responses online. We also post the versions of the paper that were used during peer review. These are the versions that the peer review comments apply to.

The versions of the paper that follow are the versions that were submitted during the peer review process. They are not the versions of record or the final published versions. They should not be cited or distributed as the published version of this manuscript.

BMJ Paediatrics Open is an open access journal and the full, final, typeset and author-corrected version of record of the manuscript is available on our site with no access controls, subscription charges or pay-per-view fees (<http://bmjpaedsopen.bmj.com>).

If you have any questions on BMJ Paediatrics Open's open peer review process please email [info.bmjpo@bmj.com](mailto:info.bmjpo@bmj.com)

# BMJ Paediatrics Open

## NeuroCNVscore: A tissue specific framework to prioritizing the pathogenicity of CNVs in neurodevelopmental disorders

|                               |                                                                                                                                                                                                                                                                                                                                                                                                                                                           |
|-------------------------------|-----------------------------------------------------------------------------------------------------------------------------------------------------------------------------------------------------------------------------------------------------------------------------------------------------------------------------------------------------------------------------------------------------------------------------------------------------------|
| Journal:                      | <i>BMJ Paediatrics Open</i>                                                                                                                                                                                                                                                                                                                                                                                                                               |
| Manuscript ID                 | bmjpo-2023-001966                                                                                                                                                                                                                                                                                                                                                                                                                                         |
| Article Type:                 | Original research                                                                                                                                                                                                                                                                                                                                                                                                                                         |
| Date Submitted by the Author: | 17-Mar-2023                                                                                                                                                                                                                                                                                                                                                                                                                                               |
| Complete List of Authors:     | Liu, Xuanshi; Beijing Children's Hospital<br>Xu, Wenjian; Beijing Children's Hospital, Biology<br>Leng, Fei; Beijing Children's Hospital<br>Zhang, Peng; Beijing Children's Hospital<br>Guo, Ruolan; Beijing Children's Hospital<br>Zhang, Yue; Beijing Children's Hospital<br>Hao, Chanjuan; Beijing Children's Hospital<br>Ni, Xin; Beijing Children's Hospital, Department of Otolaryngology, Head and Surgery<br>Li, Wei; Beijing Children's Hospital |
| Keywords:                     | Genetics                                                                                                                                                                                                                                                                                                                                                                                                                                                  |
|                               |                                                                                                                                                                                                                                                                                                                                                                                                                                                           |

SCHOLARONE™  
Manuscripts

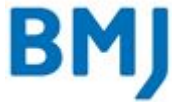

I, the Submitting Author has the right to grant and does grant on behalf of all authors of the Work (as defined in the below author licence), an exclusive licence and/or a non-exclusive licence for contributions from authors who are: i) UK Crown employees; ii) where BMJ has agreed a CC-BY licence shall apply, and/or iii) in accordance with the terms applicable for US Federal Government officers or employees acting as part of their official duties; on a worldwide, perpetual, irrevocable, royalty-free basis to BMJ Publishing Group Ltd ("BMJ") its licensees and where the relevant Journal is co-owned by BMJ to the co-owners of the Journal, to publish the Work in this journal and any other BMJ products and to exploit all rights, as set out in our [licence](#).

The Submitting Author accepts and understands that any supply made under these terms is made by BMJ to the Submitting Author unless you are acting as an employee on behalf of your employer or a postgraduate student of an affiliated institution which is paying any applicable article publishing charge ("APC") for Open Access articles. Where the Submitting Author wishes to make the Work available on an Open Access basis (and intends to pay the relevant APC), the terms of reuse of such Open Access shall be governed by a Creative Commons licence – details of these licences and which [Creative Commons](#) licence will apply to this Work are set out in our licence referred to above.

Other than as permitted in any relevant BMJ Author's Self Archiving Policies, I confirm this Work has not been accepted for publication elsewhere, is not being considered for publication elsewhere and does not duplicate material already published. I confirm all authors consent to publication of this Work and authorise the granting of this licence.

1  
2  
3  
4 **Title: NeuroCNVscore: A Tissue Specific Framework to Prioritize the**  
5  
6 **Pathogenicity of CNVs in Neurodevelopmental Disorders**  
7  
8

9 **Short title:** Prioritizing the pathogenicity of CNVs  
10

11 **Authors:** Xuanshi Liu<sup>1</sup>, Wenjian Xu<sup>1</sup>, Fei Leng<sup>1</sup>, Peng Zhang<sup>1</sup>, Ruolan Guo<sup>1</sup>, Yue  
12  
13 Zhang<sup>1</sup>, Chanjuan Hao<sup>1\*</sup>, Xin Ni<sup>2\*</sup>, Wei Li<sup>1\*</sup>  
14  
15

16 **Affiliations:**  
17

18  
19  
20 *<sup>1</sup>Beijing Key Laboratory for Genetics of Birth Defects, Beijing Paediatric Research*  
21  
22 *Institute; MOE Key Laboratory of Major Diseases in Children; Genetics and Birth*  
23  
24 *Defects Control Centre, Beijing Children's Hospital, Capital Medical University,*  
25  
26 *National Centre for Children's Health, Beijing, China;*  
27  
28

29  
30  
31 *<sup>2</sup>Department of Otolaryngology, Head and Surgery, Beijing Children's Hospital,*  
32  
33 *Capital Medical University, National Centre for Children's Health, Beijing, China.*  
34  
35

36 **\* Corresponding authors.** Emails: liwei@bch.com.cn (Li W.), nixin@bch.com.cn (Ni  
37  
38 X.), hchjhchj@163.com (Hao C.).  
39  
40  
41

42  
43 **Word Count: 4364**  
44

45  
46 **Fundings:** This work was partially supported by the Ministry of Science and  
47  
48 Technology of China (2019YFA0802104; 2016YFC1000306); the National Natural  
49  
50 Science Foundation of China (31830054); the Beijing Natural Science Foundation  
51  
52 (5222007); and the Beijing Municipal Health Commission (JingYiYan 2018-5).  
53  
54  
55  
56  
57  
58  
59  
60

## Abstract

**Background:** Neurodevelopmental disorders (NDDs) are associated with altered development of the brain especially in childhood. Copy number variants (CNVs) play a crucial role in the genetic etiology of NDDs by disturbing gene expression directly at linear sequence or remotely at three-dimensional genome level which can exert in a tissue-specific manner. There are tools for prioritizing the pathogenicity of CNVs, but none focuses specifically on NDDs, although the increased number of NDD studies using whole-genome sequencing has generated a large amount of CNVs. **Methods:** Using an XGBoost classifier, we integrated 189 features that represent genomic sequences, gene information, and functional/genomic segments for evaluating genome-wide CNVs in a neuro/brain-specific manner. We utilized Human Phenotype Ontology to construct an independent NDD-related set. **Results:** Our neuroCNVscore framework (<https://github.com/lxsbcn/neuroCNVscore>) achieved high predictive performance (PR = 0.82; AUC = 0.85) and outperformed an existing reference method SVScore. Predicted pathogenic CNVs were enriched in known autism associated genes. **Conclusions:** The neuroCNVscore prioritizes functional, deleterious and pathogenic CNVs in NDDs at whole genome-wide level, which is important for genetic studies and clinical genomic screening of NDDs as well as for providing novel biological insights into NDDs.

**Key Words:** Neurodevelopmental disorder; Copy number variant; Pathogenicity; Tissue specificity; Gene expression

**Key Messages:****• What is already known on this topic**

CNVs are important in the genetic etiology of NDDs. Systematic identification of CNV pathogenicity by virtue of their size, number and impact on genome is challenge. Several tools are available to evaluate CNVs or structural variants, but none on CNVs specific in NDDs.

**• What this study adds**

The neuroCNVscore is a useful tool in prioritizing functional and/or pathogenic CNVs in NDDs at whole genome-wide level in a neuro/brain-specific manner.

**• How this study might affect research, practice or policy**

Given the expanding studies on NDDs and the usage of sequencing in clinical practice, our neuroCNVscore speeds up the screening on pathogenic CNVs, which facilitates the clinical diagnoses of CNVs with unknown significant, and thus may provide novel biological insights into NDDs.

## Introduction

Neurodevelopmental disorders (NDDs) are characterized by the inability to achieve cognitive, emotional, and motor developmental milestones including autism spectrum disorder (ASD), attention deficit hyperactivity disorder (ADHD) and schizophrenia. It is estimated to affect over 11.3%, and 15% of the population in low and middle-income countries <sup>1</sup> and US, <sup>2</sup> respectively. NDD's heritability is high that has been estimated from twin and family studies as 50% to 90% in ASD, <sup>3</sup> 88% in ADHD <sup>4</sup> and 85% in schizophrenia. <sup>5</sup> Genomic alterations are commonly found in children with NDDs. However, the explained genetic etiology of NDDs accounts for only a small proportion.

Copy number variants (CNVs) have been shown to be important for NDD genetic etiology. <sup>6,7</sup> However, systematic identification of CNV pathogenicity by virtue of their number, size and impact on the genome is still a challenge. It is approximately 1,000 CNVs per genome ranging in size from 50 base pairs (bp) to several mega bases (Mb). CNVs, by definition, result in gain or loss of DNA segments (copy number loss and copy number gain), that are exerted by altering the dosage of gene regions <sup>8</sup> as well as by disrupting non-coding areas, <sup>7, 9</sup> which requires various genomic assays in both tissue-specific and non-specific manner to dissect. Growing number of studies by whole genome sequencing (WGS) and the complexity of identifying pathogenic CNVs make computational prediction an appropriate tool.

1  
2  
3  
4 Many assessing tools have been developed to evaluate the pathogenicity of single  
5  
6 nucleotide variants (SNVs),<sup>10 11</sup> but fewer studies have systematically focused on  
7  
8 assessing the pathogenic CNVs, especially none in NDD related CNVs. Recently,  
9  
10 SVScore,<sup>12</sup> SVFX,<sup>13</sup> SVPath,<sup>14</sup> and AnnotSV<sup>15</sup> have been developed to interpret the  
11  
12 SVs by integrating results from prediction matrices of SNPs, using cancer related SVs  
13  
14 as inputs, counting SVs with overlapped exons, or integrating multiple sources to  
15  
16 annotate SVs. However, the aggregated effects on SNPs, somatic impacts of SVs, or  
17  
18 only overlapping exons without tissue-specific information may bias the effects of  
19  
20 CNVs, and germline variations are the major focus in NDDs.  
21  
22  
23  
24  
25  
26  
27

28 We here present a novel supervised machine learning framework, named as  
29  
30 neuroCNVScore (<https://github.com/lxsbch/neuroCNVscore>), to score the  
31  
32 pathogenicity of CNVs related to NDDs. We hypothesize that the computational  
33  
34 prediction on pathogenic CNVs would benefit from a set of comprehensive tissue-  
35  
36 specific features covering the whole genomic regions. Hence, we utilized cleaned  
37  
38 germline CNVs from published NDD studies,<sup>16-19</sup> and gene lists together with a  
39  
40 comprehensive set of neuro/brain-specific data on non-coding regions from ENCODE,  
41  
42<sup>20</sup> Roadmap,<sup>21</sup> EpiMap<sup>22</sup> and PsychENCODE<sup>23</sup> to train our models. Moreover, we  
43  
44 constructed an NDD disease associated independent dataset using Human Phenotype  
45  
46 Ontology (HPO) to validate trained models. The performance of neuroCNVScore was  
47  
48 compared with a reference method SVScore.<sup>12</sup> This neuroCNVScore is designed for  
49  
50  
51  
52  
53  
54  
55  
56  
57  
58  
59  
60



1  
2  
3  
4 assessing the pathogenicity of CNVs in NDDs generated from association studies or  
5  
6 clinical diagnoses.  
7  
8  
9

## 10 11 12 **Methods**

### 13 14 15 16 17 **Data collection and pre-processing/harmonization**

18  
19  
20 The training set (identified by genomic coordinates) was gathered from several case-  
21  
22 control based NDD studies. We assigned CNVs from cases as likely pathogenic (LP).  
23  
24 In contrast, the CNVs from unaffected individuals and parents served as the control.  
25  
26 Together, we collected 86,694 CNVs in the LP and 786,058 in the control set from four  
27  
28 data sources, respectively (**Error! Reference source not found.. 1**).  
29  
30  
31  
32

33  
34 Initial data filtering and harmonization were performed on all autosomal  
35  
36 chromosome CNVs in three major steps. We first removed CNVs <50 bp and divided  
37  
38 CNVs into copy number loss and copy number gain giving their potential impacts on  
39  
40 the genome. Next, we deleted CNVs which had 90% reciprocal overlapped between LP  
41  
42 and control. Finally, we applied an empirical cumulative distribution function with bin  
43  
44 size of 60 to generate size matched LP and control to overcome the amount of disparity  
45  
46 on CNVs. For each type, we sampled the same number of LP CNVs and matched the  
47  
48 number of control CNVs in every bin. For training, we retained 13,857 cleaned LP  
49  
50 CNVs and 13,859 cleaned control CNVs.  
51  
52  
53  
54  
55  
56  
57  
58  
59  
60

1  
2  
3  
4 Next, we constructed the independent test set by assembling 51,819 disease  
5 associated variations from ClinVar and 136,181 common CNVs from GnomAD 2.1.  
6  
7 For the NDD related set, we retained CNVs with length > 50 bp, germline, pathogenic,  
8  
9 and the record of HPO: 0012759 (neurodevelopmental abnormality associated genes).  
10  
11 For common CNVs, we kept CNVs with quality record PASS, and allele frequency >  
12  
13 0.1. To avoid over estimation, we removed those CNVs with 90% reciprocal overlap  
14  
15 with the training dataset under the same variant type.  
16  
17  
18  
19  
20  
21  
22

23 Finally, we collected several NDD related gene lists to test the biological validity  
24  
25 and robustness of neuroCNVscore including CHD8 target genes,<sup>24</sup> human postsynaptic  
26  
27 density (PSD) proteins<sup>25</sup> and ASD risk genes (FDR < 0.3).<sup>18</sup> The overall workflow is  
28  
29 outlined in **Figure 1**.  
30  
31  
32

33  
34 This study has been approved by the Ethics Committee of Beijing Children's  
35  
36 Hospital, Capital Medical University (2018-k-62).  
37  
38  
39  
40  
41

### 42 **A comprehensive tissue-specific feature collection and feature matrix construction**

43  
44 For each CNV, a broad range of features was compiled into a feature matrix. We  
45  
46 leveraged 189 features in total from three different levels: (1) gene level (Gen), (2)  
47  
48 functional/genomic segment level (Fun), and (3) sequence level (Seq). The description  
49  
50 of features is shown in **Table S1**.  
51  
52  
53

54  
55 In brief, a set of gene level features (N = 62) that capture gene essentiality, dosage  
56  
57 sensitivity and neurodevelopmental phenotype associated genes were collected. Since  
58  
59  
60

1  
2  
3  
4 non-coding CNVs can disrupt regulatory regions affecting gene expression and  
5  
6 translation in a linear or 3D manner, we obtained a regulatory cascade catalogue (N =  
7  
8 120 at functional/genomic segment level) by integrating multi-omics data covering  
9  
10 experimentally identified or computational predicted regulatory regions at a tissue-  
11  
12 specific manner. Lastly, the features at sequence level (N = 7) comprised of GC content,  
13  
14 cross species conservation score (phyloP46way and phastcon46way which are derived  
15  
16 from phyloP or Hidden Markov Model via multiple alignment of 45 vertebrate genomes  
17  
18 to the human genome), heterochromatin positions, collapsed repeat regions  
19  
20 (DacMapExclude, DukeMapExclude are genomic regions calculated by different  
21  
22 algorithms) retrieved from UCSC, and human accelerated regions accessed from Doan  
23  
24 *et al.*<sup>26</sup> These features could facilitate the identification of functional genomic regions  
25  
26 and/or filter the genomic regions which may cause artefacts by downstream segments.  
27  
28  
29  
30  
31  
32  
33  
34  
35

36 Based on various features, annotations were performed in three distinct ways: (1)  
37  
38 sum up the number of overlapped features with a given CNV, (2) a discrete value that  
39  
40 denotes the number of the features which has >50% reciprocal overlapped regions with  
41  
42 a given CNV, (3) average value of overlapped regions between the feature and a given  
43  
44 CNV. After initial annotation, we divided the entire feature matrix into length of each  
45  
46 CNV and then applied min-max scaling. Considering the differences in features, e.g.  
47  
48 triplosensitivity is a measurement only for the copy number gain, we kept 172 features  
49  
50 out of 189 for the copy number loss model and 172 features in the copy number gain  
51  
52 model, respectively.  
53  
54  
55  
56  
57  
58  
59  
60

## Design of XGBoost model and the training strategy

To choose an appropriate model, we compared the performances among different algorithms (Naïve Bayes, Logistic Regression, Support Vector Machine, and XGBoost), and found XGBoost had the best performance in the python framework from Scikit 0.22.1 with the binary logistic objective function. A total of 80%/20% of the variant sets was used as training/test sets, respectively. Next, we trained the XGBoost model with optimized parameters by using grid search and evaluated our models through an independent test set. Additionally, we assessed the performance by comparing our model with SVScore.

## Statistics

Statistical analyses were performed using Python (version 2.7). The performance was measured by precision-recall (PR) and receiver operating characteristic (ROC) curves. For individual feature comparison, we applied two-tailed Wilcoxon rank-sum tests. All genomic data is in GRCh37 genome build. Figures were generated by the ggplot package in R (version 3.6.1) or matplotlib in Python.

## Patient and public involvement

1  
2  
3  
4 Patients or the public were not involved in the design, or conduct, or reporting, or  
5  
6 dissemination plans of our research. No ethical issues are involved in this study as this  
7  
8 paper only used the data deposited in the public accessible databases.  
9  
10

## 11 12 13 14 15 **Results**

### 16 17 18 19 20 **Individual feature analyses highlight the importance to collect a comprehensive** 21 22 **feature set**

23  
24  
25 To understand the characteristics of CNVs in NDDs, we investigated distribution of  
26  
27 features between LP and control sets. In total, we observed 121 and 106 significant  
28  
29 features at the threshold of  $P = 0.05$  in copy number loss and copy number gain models,  
30  
31 respectively (**Table S2**). This demonstrated a large spectrum of features showing  
32  
33 significant differences between sets, and an integrated feature framework prone to the  
34  
35 pathogenic status of CNVs that were functionally relevant.  
36  
37  
38  
39  
40

41  
42 Among these significant features, functional/genomic segment features ranked  
43  
44 higher than the others. Most of the highly ranked features were related to histone  
45  
46 modification markers (e.g. H3K27me3, H3K27ac) and 3D chromatin related features  
47  
48 (e.g. enhancers) (**Figure 2**). This is expected since noncoding regions account for 98%  
49  
50 of the human genome and CNVs can affect the genome by interrupting the regulatory  
51  
52 regions.  
53  
54  
55  
56  
57  
58  
59  
60

### Comparisons among four algorithms show that XGBoost outperforms others

To find an optimal model for discriminating pathogenic CNVs, we evaluated the predictive performance of Naïve Bayes, Logistic Regression, Support Vector Machine (SVM) and XGBoost on the test sets (**Figure 3**). XGBoost model performed the best (average precision (AP) and area under curve (AUC) were 0.82, 0.85 for copy number loss; AP and AUC were 0.80, 0.84 for copy number gain). Therefore, we applied the XGBoost to construct the neuroScoreCNV.

### Accuracy assessments reveal better performance of neuroScoreCNV

We evaluated the performance of neuroScoreCNV and SVScore by the independent set as described in the flowchart (**Fig. 1**). neuroScoreCNV achieved relatively higher performance compared to SVScore (**Figure 4B, D**). For two different types of models, we observed AP = 0.88, AUC = 0.93 at copy number loss (**Figure 4A, B**, orange line), and AP = 0.68, AUC = 0.67 at copy number gain model (**Figure 4C, D**, orange line). The different performances between models are in agreement with a previous study.<sup>13</sup>

Moreover, we investigated the biological validity and robustness from two aspects. It was shown interruptions at conserved regions could cause diseases since these regions are normally functional.<sup>27</sup> Therefore, we first computed the CNV pathogenic scores generated with the new feature matrices in which a conservation score (i.e. PhyloP46way, one of the commonly used conservation score that considering individual base conservation) was excluded. We observed higher CNV pathogenic

1  
2  
3  
4 scores ( $\geq 0.7$ ) tended to have higher conservation scores after correlating  
5  
6  
7  $\log_{10}(\text{PhyloP46way})$  and new pathogenic scores (**Figure 5A, B**). Then, we checked if  
8  
9  
10 our predicted scores were capable of prioritizing CNVs with known NDD associated  
11  
12 genes. LP CNVs covered significantly ( $P < 0.05$ ) more NDD related genes than the  
13  
14 control group (**Figure 5B**). Overall, our approach achieved higher performance in  
15  
16 discriminating LP CNVs from control or benign CNVs.  
17  
18  
19  
20  
21  
22

### 23 **Feature importancy highlights the important role of regulatory regions in NDDs**

24  
25 We computed the feature importancy by permutation. We categorized model features  
26  
27 into three groups: functional/genomic level (Fun), gene level (Gen) and sequence level  
28  
29 (Seq) (**Figure 6, Table S3**). The most important features were genes with  
30  
31 haploinsufficiency scores (PHI) and triplosensitivity scores (PTS). PHI reflects the  
32  
33 probability of one single functional copy to be sufficient to maintain function, whereas  
34  
35 PTS suggests the probability of an additional copy of a gene for generating phenotypes.  
36  
37 PHI and PTS are important parameters for evaluating the pathogenicity in clinical  
38  
39 diagnoses based on the ACMG guidelines.<sup>28</sup> This is also true in neuroCNVScore. In  
40  
41 NDDs, several studies found pathogenic CNVs were sensitive to dosage.<sup>29</sup>  
42  
43  
44  
45  
46  
47  
48  
49

50 Additionally, we noticed several phenotypes were prominent such as HPO: 000717  
51  
52 (autism associated genes), HPO: 0002960 (autoimmunity associated genes) and HPO:  
53  
54 0025031 (abnormality of the digestive system associated genes). It is known that  
55  
56 immune system abnormalities and/or gastrointestinal symptoms can co-occur with  
57  
58  
59  
60

1  
2  
3  
4 ASD<sup>30</sup> and schizophrenia.<sup>31</sup> Compelling evidence demonstrated autoimmune response  
5  
6 was important in ASD.<sup>32</sup> Purified IgG containing antibodies from the mothers of  
7  
8 children with ASD can cause abnormal behaviours in animal models.<sup>33,34</sup>  
9  
10

11  
12 Among important features at the functional/genomic segment level, we observed  
13  
14 several key players in 3D chromatin conformation including enhancers and TADs.  
15  
16 Meanwhile, DNase-Seq which suggests active regulatory elements at open chromatin  
17  
18 was also an important feature. The emerging evidence has highlighted the role of 3D  
19  
20 chromatin conformation in relation to NDDs.<sup>23,35</sup> Collectively, studying the interaction  
21  
22 between CNVs and the higher order of chromatin conformation could provide novel  
23  
24 insights into the etiology of NDDs and explain the missing heredity of NDDs.  
25  
26  
27  
28  
29  
30  
31  
32  
33

### 34 **Discussion**

35  
36  
37  
38  
39 In this work, we introduced a novel framework, neuroCNVscore, to ascertain the  
40  
41 pathogenicity of CNVs in NDDs. NeuroCNVscore outperformed a commonly used tool  
42  
43 SVScore on independent datasets from ClinVar and gnomAD. Importantly,  
44  
45 neuroCNVscore has unique ability to prioritize the functional, deleterious and  
46  
47 pathogenic CNVs derived from either NDD's association studies or clinical diagnoses,  
48  
49 which may provide biological new insights into NDDs, especially at the three-  
50  
51 dimensional genome level.  
52  
53  
54  
55  
56  
57  
58  
59  
60



1  
2  
3  
4 There are several factors contribute to the accuracy and robustness of  
5  
6 neuroCNVscore. First, we used a high-quality set of germline CNVs from published  
7  
8 NDD studies as the training set, which assures that our model is of high quality.  
9  
10  
11 Secondly, we validated our models at an NDD associated independent dataset and  
12  
13 outperformed a published tool, SVScore. Furthermore, we created a comprehensive  
14  
15 feature collection (N = 189) at gene, functional genomic, and sequence levels.  
16  
17 Specifically, we incorporated a significant amount of tissue-specific functional  
18  
19 genomic data. As a result, we can not only identify the genes disrupted by CNVs, but  
20  
21 also the disrupted regulatory elements that act in a tissue-specific manner during  
22  
23 development. This is especially important for the studies in NDD since brain tissue is  
24  
25 normally hard to access.  
26  
27  
28  
29  
30  
31  
32

33  
34 While the neuroCNVscore performed well, it may be improved by incorporating  
35  
36 expert-curated CNVs from whole genome sequencing studies in NDDs and healthy  
37  
38 controls. Along with the increased knowledge and functional genomics data on non-  
39  
40 coding regions, additional informative features can be integrated into the model to  
41  
42 better address the hidden mechanisms. Moreover, we developed neuroCNVscore based  
43  
44 on XGBoost, but it is worth exploring deep learning algorithms in the future.  
45  
46  
47  
48  
49

50 Together, our neuroCNVscore performed well and is a useful tool for generating  
51  
52 hypotheses in genome wide association studies in NDDs and could facilitate the  
53  
54 understanding of genetic etiology of NDDs.  
55  
56  
57  
58  
59  
60

## Competing Interests

The authors declare that they have no competing interests.

## Author Contributions

XL designed the study, performed the analysis and drafted the manuscript. WX and FL participated in the design and interpretation of the data and revised the manuscript. PZ, RG and YZ participated in the interpretation of data. CH coordinated the project and supervised the study. XN coordinated the project and acquisition the funding. WL coordinated the project, supervised the study, critically reviewed and revised the manuscript. All authors read and approved the final manuscript.

## Availability of Data and Materials

All features analysed during this study are collected from public datasets. Sources can be found from [https://github.com/macarthur-lab/gene\\_lists](https://github.com/macarthur-lab/gene_lists). All CNV training data are included in these publications<sup>16-19</sup> and testing data are from the ClinVar database. The source code is available at <https://github.com/lxsbch/neuroCNVscore>.

## Acknowledgements

1  
2  
3  
4 We thank MacArthur's Lab for sharing the comprehensive collections of gene lists. We  
5  
6  
7 thank Dr. Sree Rohit Raj Kolora for reviewing, revising the manuscript and useful  
8  
9  
10 discussion.

## 11 12 13 14 15 **References**

- 16  
17  
18  
19  
20 1. Bitta M, Kariuki SM, Abubakar A, et al. Burden of neurodevelopmental disorders in  
21  
22  
23 low and middle-income countries: A systematic review and meta-analysis.  
24  
25  
26 *Wellcome Open Res* 2017;2:121. doi: 10.12688/wellcomeopenres.13540.3  
27
- 28  
29 2. America's Children and the Environment. Health: Neurodevelopmental Disorders –  
30  
31  
32 Report Contents, 2019.  
33
- 34  
35 3. Gaugler T, Klei L, Sanders SJ, et al. Most genetic risk for autism resides with  
36  
37  
38 common variation. *Nat Genet* 2014;46:881-5. doi: 10.1038/ng.3039  
39
- 40  
41 4. Larsson H, Chang Z, D'Onofrio BM, et al. The heritability of clinically diagnosed  
42  
43  
44 attention deficit hyperactivity disorder across the lifespan. *Psychol Med*  
45  
46  
47 2014;44:2223-9. doi: 10.1017/S0033291713002493  
48
- 49  
50 5. Cardno AG, Marshall EJ, Coid B, et al. Heritability estimates for psychotic disorders:  
51  
52  
53 the Maudsley twin psychosis series. *Arch Gen Psychiatry* 1999;56:162-8. doi:  
54  
55  
56 10.1001/archpsyc.56.2.162  
57
- 58  
59 6. Marshall CR, Howrigan DP, Merico D, et al. Contribution of copy number variants  
60  
to schizophrenia from a genome-wide study of 41,321 subjects. *Nat Genet*

- 2017;49:27-35. doi: 10.1038/ng.3725
7. Brandler WM, Antaki D, Gujral M, et al. Paternally inherited cis-regulatory structural variants are associated with autism. *Science* 2018;360:327-31. doi: 10.1126/science.aan2261
8. Coe BP, Stessman HAF, Sulovari A, et al. Neurodevelopmental disease genes implicated by de novo mutation and copy number variation morbidity. *Nat Genet* 2019;51:106-16. doi: 10.1038/s41588-018-0288-4
9. Devanna P, Chen XS, Ho J, et al. Next-gen sequencing identifies non-coding variation disrupting miRNA-binding sites in neurological disorders. *Mol Psychiatry* 2018;23:1375-84. doi: 10.1038/mp.2017.30
10. Adzhubei IA, Schmidt S, Peshkin L, et al. A method and server for predicting damaging missense mutations. *Nat Methods* 2010;7:248-9. doi: 10.1038/nmeth0410-248
11. Jaganathan K, Kyriazopoulou Panagiotopoulou S, McRae JF, et al. Predicting Splicing from Primary Sequence with Deep Learning. *Cell* 2019;176:535-48 e24. doi: 10.1016/j.cell.2018.12.015
12. Ganel L, Abel HJ, FinMetSeq C, et al. SVScore: an impact prediction tool for structural variation. *Bioinformatics* 2017;33:1083-85. doi: 10.1093/bioinformatics/btw789
13. Kumar S, Harmanci A, Vythoeswaran J, et al. SVFX: a machine learning framework to quantify the pathogenicity of structural variants. *Genome Biol* 2020;21:274.

- 1  
2  
3  
4 doi: 10.1186/s13059-020-02178-x  
5  
6  
7 14. Yang Y, Wang X, Zhou D, et al. SVPath: an accurate pipeline for predicting the  
8  
9 pathogenicity of human exon structural variants. *Brief Bioinform* 2022;23:  
10  
11 bbac014 doi: 10.1093/bib/bbac014  
12  
13  
14  
15 15. Geoffroy V, Guignard T, Kress A, et al. AnnotSV and knotAnnotSV: a web server  
16  
17 for human structural variations annotations, ranking and analysis. *Nucleic Acids*  
18  
19 *Res* 2021;49:W21-W28. doi: 10.1093/nar/gkab402  
20  
21  
22  
23 16. Coe BP, Witherspoon K, Rosenfeld JA, et al. Refining analyses of copy number  
24  
25 variation identifies specific genes associated with developmental delay. *Nat*  
26  
27 *Genet* 2014;46:1063-71. doi: 10.1038/ng.3092  
28  
29  
30  
31 17. Cooper GM, Coe BP, Girirajan S, et al. A copy number variation morbidity map of  
32  
33 developmental delay. *Nat Genet* 2011;43:838-46. doi: 10.1038/ng.909  
34  
35  
36  
37 18. Sanders SJ, He X, Willsey AJ, et al. Insights into Autism Spectrum Disorder  
38  
39 Genomic Architecture and Biology from 71 Risk Loci. *Neuron* 2015;87:1215-  
40  
41 33. doi: 10.1016/j.neuron.2015.09.016  
42  
43  
44  
45 19. Zarrei M, Burton CL, Engchuan W, et al. A large data resource of genomic copy  
46  
47 number variation across neurodevelopmental disorders. *NPJ Genom Med*  
48  
49 2019;4:26. doi: 10.1038/s41525-019-0098-3  
50  
51  
52  
53 20. Davis CA, Hitz BC, Sloan CA, et al. The Encyclopedia of DNA elements  
54  
55 (ENCODE): data portal update. *Nucleic Acids Res* 2018;46:D794-D801. doi:  
56  
57 10.1093/nar/gkx1081  
58  
59  
60

- 1  
2  
3  
4 21. Roadmap Epigenomics C, Kundaje A, Meuleman W, et al. Integrative analysis of  
5  
6 111 reference human epigenomes. *Nature* 2015;518:317-30. doi:  
7  
8 10.1038/nature14248  
9  
10  
11  
12 22. Boix CA, James BT, Park YP, et al. Regulatory genomic circuitry of human disease  
13  
14 loci by integrative epigenomics. *Nature* 2021;590:300-07. doi:  
15  
16 10.1038/s41586-020-03145-z  
17  
18  
19  
20 23. Wang D, Liu S, Warrell J, et al. Comprehensive functional genomic resource and  
21  
22 integrative model for the human brain. *Science* 2018;362:eaat8464. doi:  
23  
24 10.1126/science.aat8464  
25  
26  
27  
28 24. Sugathan A, Biagioli M, Golzio C, et al. CHD8 regulates neurodevelopmental  
29  
30 pathways associated with autism spectrum disorder in neural progenitors. *Proc*  
31  
32 *Natl Acad Sci U.S.A.* 2014;111:E4468-77. doi: 10.1073/pnas.1405266111  
33  
34  
35  
36 25. Bayes A, van de Lagemaat LN, Collins MO, et al. Characterization of the proteome,  
37  
38 diseases and evolution of the human postsynaptic density. *Nat Neurosci*  
39  
40 2011;14:19-21. doi: 10.1038/nn.2719  
41  
42  
43  
44 26. Doan RN, Bae BI, Cubelos B, et al. Mutations in Human Accelerated Regions  
45  
46 Disrupt Cognition and Social Behavior. *Cell* 2016;167:341-54 e12. doi:  
47  
48 10.1016/j.cell.2016.08.071  
49  
50  
51  
52 27. Kellis M, Wold B, Snyder MP, et al. Defining functional DNA elements in the  
53  
54 human genome. *Proc Natl Acad Sci U.S.A.* 2014;111:6131-8. doi:  
55  
56 10.1073/pnas.1318948111  
57  
58  
59  
60

- 1  
2  
3  
4 28. Richards S, Aziz N, Bale S, et al. Standards and guidelines for the interpretation of  
5  
6 sequence variants: a joint consensus recommendation of the American College  
7  
8 of Medical Genetics and Genomics and the Association for Molecular  
9  
10 Pathology. *Genet Med* 2015;17:405-24. doi: 10.1038/gim.2015.30  
11  
12  
13  
14  
15 29. Han X, Chen S, Flynn E, et al. Distinct epigenomic patterns are associated with  
16  
17 haploinsufficiency and predict risk genes of developmental disorders. *Nat*  
18  
19 *Commun* 2018;9:2138. doi: 10.1038/s41467-018-04552-7  
20  
21  
22  
23 30. Hughes HK, Mills Ko E, Rose D, et al. Immune Dysfunction and Autoimmunity as  
24  
25 Pathological Mechanisms in Autism Spectrum Disorders. *Front Cell Neurosci*  
26  
27 2018;12:405. doi: 10.3389/fncel.2018.00405  
28  
29  
30  
31 31. Severance EG, Prandovszky E, Castiglione J, et al. Gastroenterology issues in  
32  
33 schizophrenia: why the gut matters. *Curr Psychiatry Rep* 2015;17:27. doi:  
34  
35 10.1007/s11920-015-0574-0  
36  
37  
38  
39 32. Wu S, Ding Y, Wu F, et al. Family history of autoimmune diseases is associated  
40  
41 with an increased risk of autism in children: A systematic review and meta-  
42  
43 analysis. *Neurosci Biobehav Rev* 2015;55:322-32. doi:  
44  
45 10.1016/j.neubiorev.2015.05.004  
46  
47  
48  
49  
50 33. Bauman MD, Iosif AM, Ashwood P, et al. Maternal antibodies from mothers of  
51  
52 children with autism alter brain growth and social behavior development in the  
53  
54 rhesus monkey. *Transl Psychiatry* 2013;3:e278. doi: 10.1038/tp.2013.47  
55  
56  
57  
58 34. Hertz-Picciotto I, Croen LA, Hansen R, et al. The CHARGE study: an  
59  
60

1  
2  
3  
4 epidemiologic investigation of genetic and environmental factors contributing  
5  
6 to autism. *Environ Health Perspect* 2006;114:1119-25. doi: 10.1289/ehp.8483  
7  
8

- 9  
10 35. Won H, de la Torre-Ubieta L, Stein JL, et al. Chromosome conformation elucidates  
11  
12 regulatory relationships in developing human brain. *Nature* 2016;538:523-27.  
13  
14  
15 doi: 10.1038/nature19847  
16  
17  
18  
19

## 20 **Figure Legends**

21  
22  
23  
24  
25  
26 **Figure 1.** The flowchart of neuroCNVscore development and evaluation in this study.

27  
28 In Data Sets, the sources of training set and test set are listed. The training set was  
29  
30 derived from four NDDs studies under the case-control design, while the validation set  
31  
32 was from ClinVar and GnomAD. The numbers of raw and cleaned CNVs in the  
33  
34 brackets are indicated. LP, likely pathogenic. In Neuro-features, comprehensive  
35  
36 neuro/brain related features were gathered at gene, sequence, and functional/genomic  
37  
38 segments levels. In Prediction and Validation, biological validations were performed in  
39  
40 two ways: 1) correlations between phyloP46way and the pathogenic scores generated  
41  
42 by the new model where phyloP46way was excluded from the feature matrix; 2) using  
43  
44 the independent set of NDD related gene lists including PSD genes to cognition, CHD8  
45  
46 targets, and ASD risk genes.  
47  
48  
49  
50  
51  
52  
53  
54  
55  
56  
57

58 **Figure 2.** Comparisons of top three features between control and LP (likely pathogenic)  
59  
60



1  
2  
3  
4 sets. The top three significant features between control and LP sets in copy number loss  
5  
6  
7 (A) and copy number gain (B). The X-axis shows the significant feature types.  
8  
9 Fun\_level, Function/genomic segment level. The Y-axis is the value of log transformed  
10  
11 feature matrices. Unpaired *t*-tests were applied and significant levels were. \*\*\*\*  $P <$   
12  
13 0.0001.  
14  
15  
16  
17  
18  
19

20 **Figure 3.** Performances on CNVs among Naïve Bayes, Logistic Regression, Support  
21  
22 Vector Machine (SVM) and XGBoost algorithms. XGBoost showed the best  
23  
24 performance by precision-recall curve and ROC curve for both copy number loss (A,  
25  
26 B) and copy number gain (C, D). AP: average precision; AUC: area under curve.  
27  
28  
29  
30

31  
32  
33 **Figure 4.** Performances on neuroCNVscore and SVScore in the independent set as  
34  
35 described in the flowchart of Figure 1. Precision-Recall (A) and ROC (B) curves  
36  
37 calculated with copy number loss from the independent dataset; Precision-Recall (C)  
38  
39 and ROC (D) curves calculated with copy number gain from the independent dataset.  
40  
41  
42  
43  
44  
45

46  
47 **Figure 5.** Biological validation of neuroCNVscore. The plot (A) shows the  
48  
49 comparisons between PhyloP scores ( $\log_{10}(\text{PhyloP46way})$ ) and pathogenic scores  
50  
51 generated by excluding PhyloP46way from the original neuroCNVscore model, regions  
52  
53 with higher pathogenic scores tend to have higher PhyloP scores. The number of NDD  
54  
55 related genes (B) between predicted LP and control groups in both copy number loss  
56  
57  
58  
59  
60

1  
2  
3  
4 and copy number gain models shows that more NDD related genes are found in LP. To  
5  
6 present the figures in a clearer way, PhyloP46way and count were log-transformed. \* $P$   
7  
8  
9 < 0.05.  
10

11  
12  
13  
14  
15 **Figure 6.** Top 20 features from feature importance analyses. Highly important features  
16  
17 of copy number loss model (A) and copy number gain model (B) are listed. All the  
18  
19 feature names were colored and formatted as following: feature type (Fun\_/Gen\_  
20  
21 /Seq\_ feature names (original sources)\_tissue type (if applicable). Fun: Function, in blue;  
22  
23 Gen: Gene, in green; Seq: Sequence, in purple.  
24  
25  
26  
27  
28  
29  
30

### 31 **Supplementary Tables**

32  
33  
34  
35  
36 **Table S1.** A detailed feature description.

37  
38  
39 **Table S2.** Individual feature comparisons.

40  
41  
42 **Table S3.** Feature importancy.  
43  
44  
45  
46  
47  
48  
49  
50  
51  
52  
53  
54  
55  
56  
57  
58  
59  
60

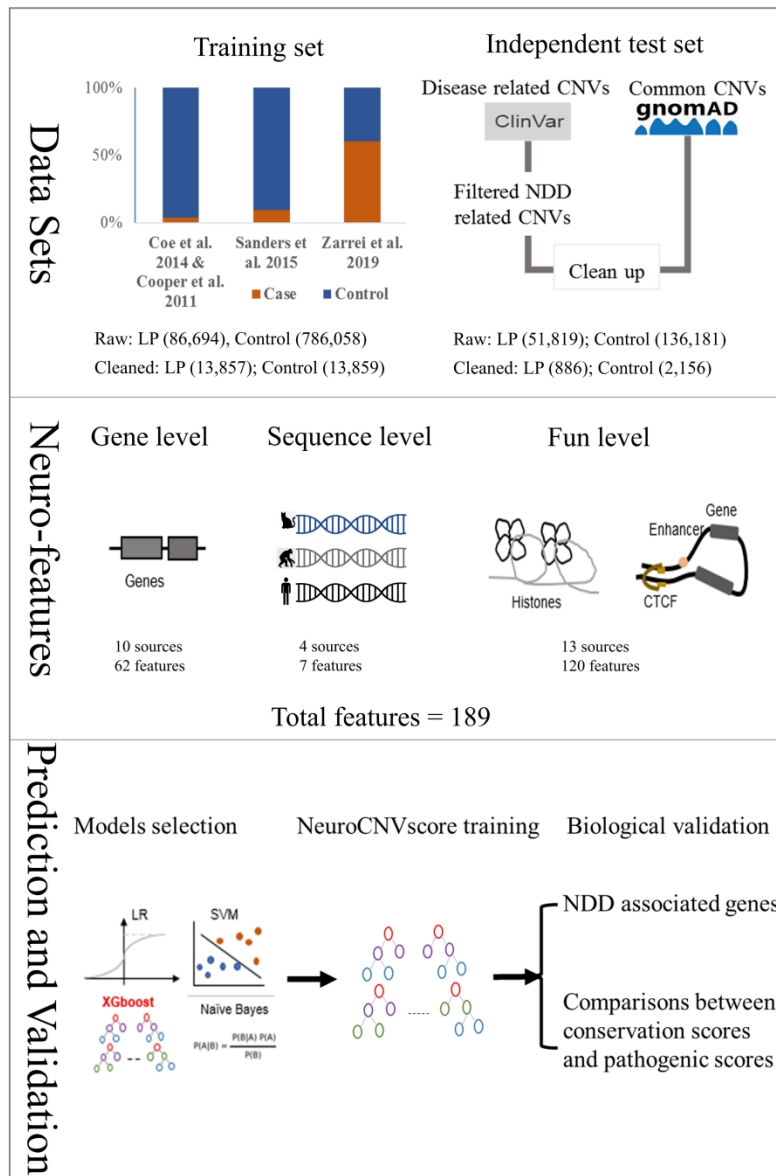

Figure 1-flowchart of data analysis

140x202mm (600 x 600 DPI)

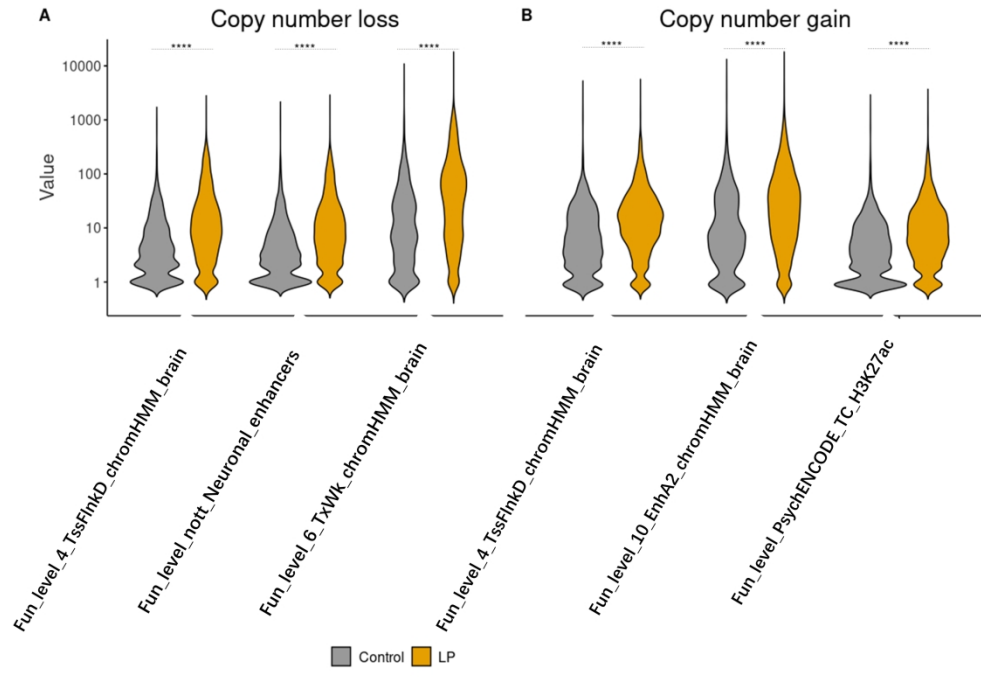

Figure 2-Top features

198x137mm (600 x 600 DPI)

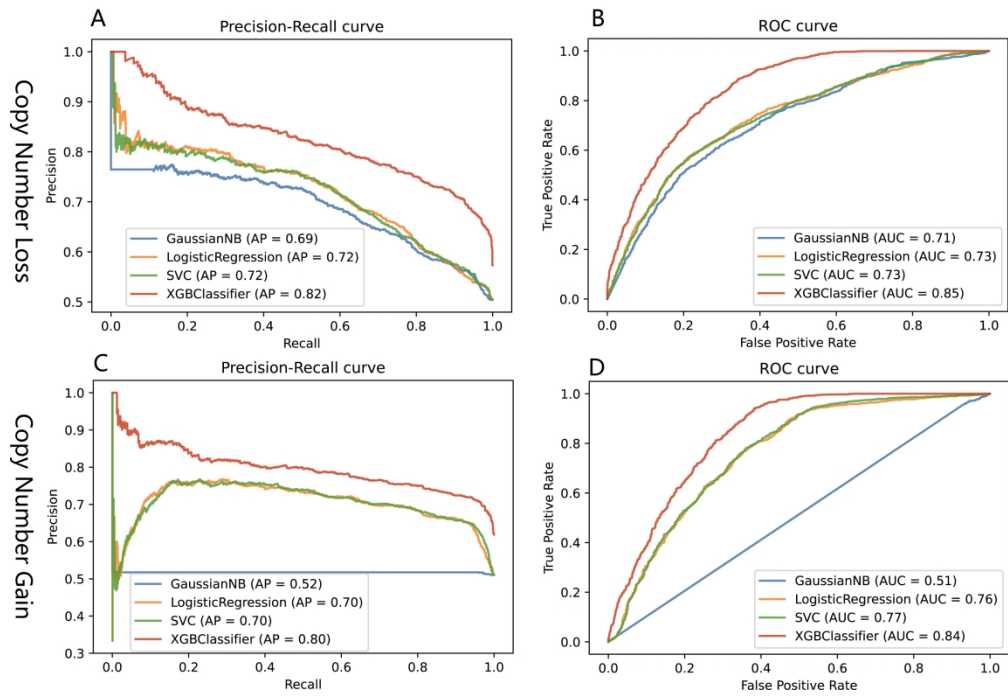

Figure 3-XGBooster performance

252x172mm (300 x 300 DPI)

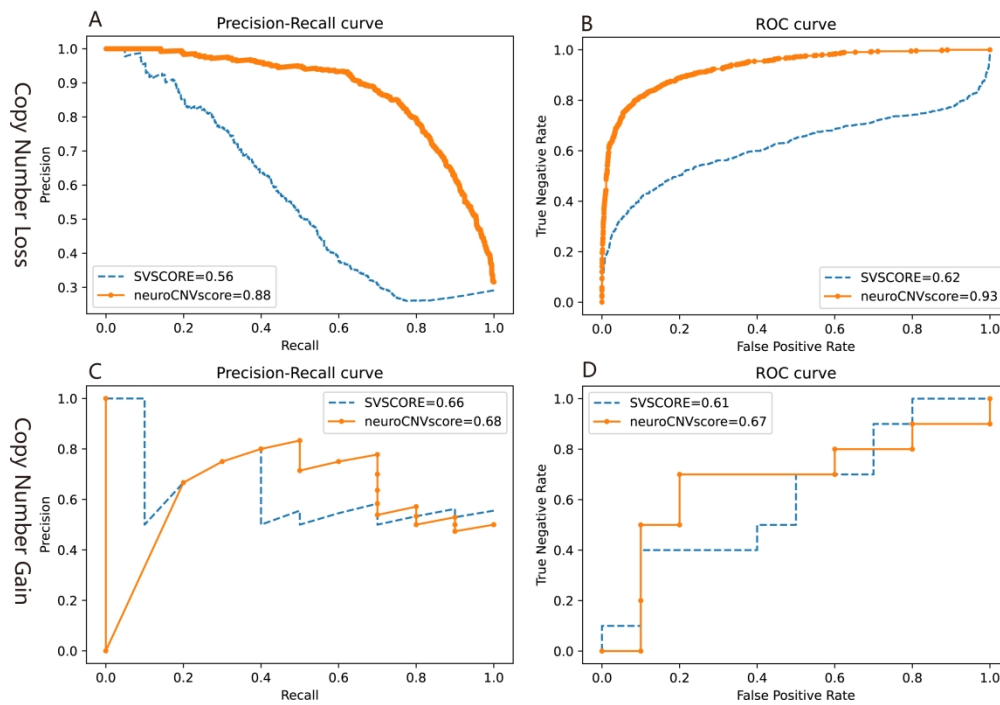

Figure 4-neuroCNV vs. SV

276x190mm (300 x 300 DPI)

1  
2  
3  
4  
5  
6  
7  
8  
9  
10  
11  
12  
13  
14  
15  
16  
17  
18  
19  
20  
21  
22  
23  
24  
25  
26  
27  
28  
29  
30  
31  
32  
33  
34  
35  
36  
37  
38  
39  
40  
41  
42  
43  
44  
45  
46  
47  
48  
49  
50  
51  
52  
53  
54  
55  
56  
57  
58  
59  
60

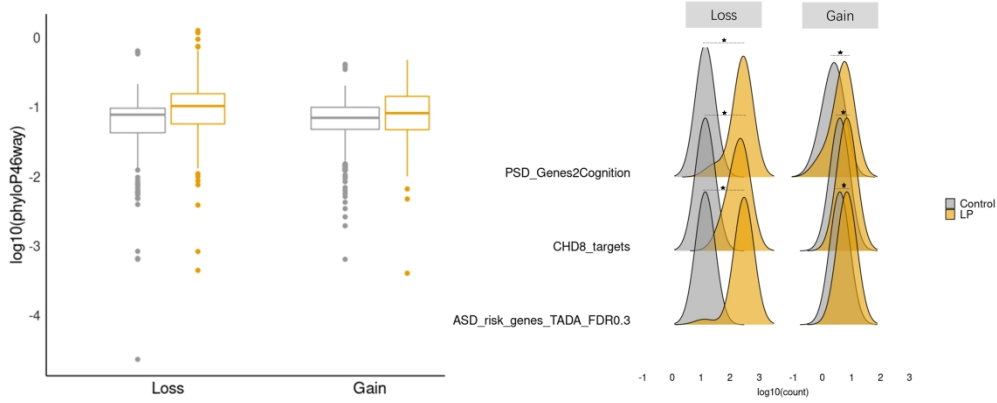

Figure 5-biological validation  
293x122mm (600 x 600 DPI)

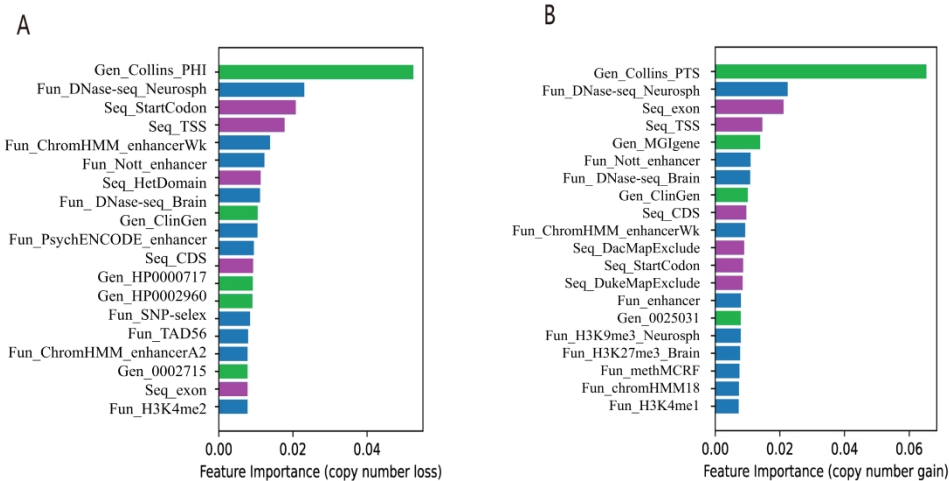

Figure 6-feature importality

2040x1120mm (96 x 96 DPI)



## Supplementary Tables

**Table S1.** A detailed feature description. This table includes all features used in our model. These features are grouped into three levels: gene, functional/genomic segment and sequence. A brief description along with references is described on each feature.

| Feature category    | Feature set                               | Description                                                                                                                                                                                                                         | Feature type | References |
|---------------------|-------------------------------------------|-------------------------------------------------------------------------------------------------------------------------------------------------------------------------------------------------------------------------------------|--------------|------------|
| Gene level (N = 61) | Cell essential and nonessential genes     | CRISPR/Cas9 screens identified essential genes in human cell lines. Curated in <sup>2</sup>                                                                                                                                         | discrete     | 1          |
|                     | ClinGen curated genes and genomic regions | Genes and genomics regions were rated from 0 to 3, indicating an increased evidence on dosage sensitivity. Additional two levels (40,30) suggest unlikely dosage sensitive and genes associated with autosomal recessive phenotype. | discrete     | 3          |
|                     | DDG2P database                            | A curated list of genes linked to developmental disorders compiled by clinicians as part of the DDD study to facilitate clinical feedback on likely causal variants                                                                 | discrete     | 4          |
|                     | Dosage sensitive genes                    | Predicted score on dosage sensitive genes (i.e., haploinsufficiency or triplosensitivity)                                                                                                                                           | discrete     | 5, 34      |
|                     | FDA proved drug target                    | Genes with protein products that are mechanistic targets of FDA-approved drugs. Curated in <sup>2</sup>                                                                                                                             | discrete     | 6          |
|                     | G protein-coupled receptor                | GPCR list curated in <sup>2</sup>                                                                                                                                                                                                   | discrete     | 32, 33, 35 |
|                     | Mouse heterozygous LoF lethal             | Genes that are lethal in mouse models when inactivated heterozygous. Curated by <sup>2</sup>                                                                                                                                        | discrete     | 7          |
|                     | Neurodevelopmental process related genes  | Genes associated with various phenotypes from HPO: Abnormality of the nervous system (HP:0000707)-associated genes<br>Abnormality of nervous system physiology (HP:0012638)-associated                                              | discrete     | 8          |

|  |                     |                                                                                                                                                                                                                                                                                                                                                                                                                                                                                                                                                                                                                                                                                                                                                                                                                                                                                                                                                                                                                                                                                                                                                                                                                                                                                               |          |    |
|--|---------------------|-----------------------------------------------------------------------------------------------------------------------------------------------------------------------------------------------------------------------------------------------------------------------------------------------------------------------------------------------------------------------------------------------------------------------------------------------------------------------------------------------------------------------------------------------------------------------------------------------------------------------------------------------------------------------------------------------------------------------------------------------------------------------------------------------------------------------------------------------------------------------------------------------------------------------------------------------------------------------------------------------------------------------------------------------------------------------------------------------------------------------------------------------------------------------------------------------------------------------------------------------------------------------------------------------|----------|----|
|  |                     | <p>genes</p> <p>Behavioral abnormality (HP:0000708)-associated genes</p> <p>Abnormality of nervous system morphology (HP:0012639)-associated genes</p> <p>Abnormality of the immune system (HP:0002715)-associated genes</p> <p>Neurodevelopmental abnormality (HP:0012759)-associated genes</p> <p>Autoimmunity (HP:0002960)-associated genes</p> <p>Morphological abnormality of the central nervous system (HP:0002011)-associated genes</p> <p>Schizophrenia (HP:0100753)-associated genes</p> <p>Autistic behavior (HP:0000729)-associated genes</p> <p>Abnormality of movement (HP:0100022)-associated genes</p> <p>Seizures (HP:0001250)-associated genes</p> <p>Autism (HP:0000717)-associated genes</p> <p>Hyperactivity (HP:0000752)-associated genes</p> <p>Abnormality of prenatal development or birth (HP:0001197)-associated genes</p> <p>Impairment in personality functioning (HP:0031466)-associated genes</p> <p>Abnormality of the digestive system (HP:0025031)-associated genes</p> <p>Growth abnormality (HP:0001507)-associated genes</p> <p>Abnormal fear/anxiety-related behavior (HP:0100852)-associated genes</p> <p>Abnormality of brain morphology (HP:0012443)-associated genes</p> <p>Abnormality of higher mental function (HP:0011446)-associated genes</p> |          |    |
|  | Olfactory receptors | Any HUGO-recognized family of olfactory receptor genes                                                                                                                                                                                                                                                                                                                                                                                                                                                                                                                                                                                                                                                                                                                                                                                                                                                                                                                                                                                                                                                                                                                                                                                                                                        | discrete | 9  |
|  | SFARI gene          | Genes implicated in autism susceptibility                                                                                                                                                                                                                                                                                                                                                                                                                                                                                                                                                                                                                                                                                                                                                                                                                                                                                                                                                                                                                                                                                                                                                                                                                                                     | discrete | 10 |

1  
2  
3  
4  
5  
6  
7  
8  
9  
10  
11  
12  
13  
14  
15  
16  
17  
18  
19  
20  
21  
22  
23  
24  
25  
26  
27  
28  
29  
30  
31  
32  
33  
34  
35  
36  
37  
38  
39  
40  
41  
42  
43  
44  
45  
46

|                                                                                                                                   |                            |                                                                                                                                                          |            |    |
|-----------------------------------------------------------------------------------------------------------------------------------|----------------------------|----------------------------------------------------------------------------------------------------------------------------------------------------------|------------|----|
| Functional/genomic segment level (N = 121)                                                                                        | Chromatin states           | Brain related chromatin states inferred by the extended 18-way ChromHMM model across 98 tissues from the Roadmap Epigenomics Project                     | discrete   | 11 |
|                                                                                                                                   | CTCF binding sites         | Genome wide observed CTCF binding sites from Brain                                                                                                       | continuous | 12 |
|                                                                                                                                   |                            | Genome wide CTCF binding sites from 7 cell lines generated by CHIP-seq. Curated by UCSC                                                                  | continuous | 13 |
|                                                                                                                                   | DNA Accessibility          | ATAC-seq from brain and neurosph.                                                                                                                        | continuous | 13 |
|                                                                                                                                   | DNase hypersensitive sites | Observed DNase I hypersensitive areas from brain and neurosph.                                                                                           | continuous | 13 |
|                                                                                                                                   |                            | DNase hypersensitive sites assayed from a collection of cell types. Download from UCSC table browser NAR 2004                                            | continuous | 14 |
|                                                                                                                                   |                            | RoadmapDNasePromCount                                                                                                                                    | discrete   | 15 |
|                                                                                                                                   | Enhancers                  | Brain cell type-specific enhancers identified by PLAC-seq                                                                                                | discrete   | 16 |
|                                                                                                                                   |                            | dbSUPER: Super enhancers from Brain Angular Gyrus; Brain Anterior Caudate; Brain Cingulate Gyrus; Brain Hippocampus Middle; Brain Inferior Temporal Lobe | discrete   | 17 |
|                                                                                                                                   |                            | EpiMap: enhancers from the brain and neurosph.                                                                                                           | discrete   | 12 |
|                                                                                                                                   |                            | EnhancerAtlas 2.0: Enhancer predictions in 197 human cell lines & tissues                                                                                | discrete   | 18 |
|                                                                                                                                   |                            | FANTOM Enhancers: Enhancer predictions for human tissues and cell types from the FANTOM5 consortium                                                      | discrete   | 19 |
| HACER: Active enhancer predictions in human cell lines & tissues based on PRO-seq, GRO-seq, or CAGE data                          |                            | discrete                                                                                                                                                 | 20         |    |
| PsychENCODE: PEC EnhancersDER-03a_hg19_PEC_enhancers_clean.bed                                                                    |                            | discrete                                                                                                                                                 | 21         |    |
| SEA: Super enhancer predictions from 143 human cell lines and tissues (mapped back to hg19 using liftOver with minimum 75% match) | discrete                   | 23                                                                                                                                                       |            |    |

|  |                                                                                     |                                                                                                                                                                                                |            |    |
|--|-------------------------------------------------------------------------------------|------------------------------------------------------------------------------------------------------------------------------------------------------------------------------------------------|------------|----|
|  |                                                                                     | Sedb: Super enhancer and typical enhancer predictions from 541 human cell lines and tissues                                                                                                    | discrete   | 22 |
|  |                                                                                     | VISTA: Experimentally-validated mammalian enhancers                                                                                                                                            | discrete   | 24 |
|  | Genomic segmentations                                                               | All autosomal, protein-coding genes; CDS; exon; Selenocysteine; start_codon; stop_codon; transcript UTR                                                                                        | discrete   | 25 |
|  | Histone markers                                                                     | H2AFZ, H2AK5ac, H2AK9ac, H2BK120ac, H2BK12ac, H2BK15ac, H2BK20ac, H2BK5ac, H3F3A, H3K27ac, H3K4ac, H3K4me1, H3K4me2, H3K4me3, H3K9ac, H3K9me1, H3K9me2, H3K9me3 from the brain or neurosph     | continuous | 12 |
|  |                                                                                     | H3K27ac peaks for the Prefrontal Cortex, the Temporal Cortex, and the Cerebellar Cortex                                                                                                        | continuous | 21 |
|  | Long range probable genes                                                           | Target genes by prediction on GWAS hits and 3D chromatin structures                                                                                                                            | discrete   | 26 |
|  | Loop anchors and topological associated domains in higher-order chromatin structure | TAD boundaries (defined as the start and end coordinates for each TAD $\pm$ 5kb) from 30 samples meeting our ENCODE data inclusion criteria available for download from the ENCODE Data Portal | continuous | 14 |
|  |                                                                                     | Selected "derived" datasets from PsychENCODE Integrated Analysis Package, including cortex enhancers, transcriptionally active regions, TAD boundaries, and H3k27ac peaks                      | continuous | 21 |
|  |                                                                                     | Yue labs                                                                                                                                                                                       | continuous | 27 |
|  | Methylation                                                                         | MeDIP/MRE (mCRF) methylation calls                                                                                                                                                             | continuous | 15 |
|  | Transcript active regions                                                           | Cortex Transcriptionally Active Regions are found within at least 70% of the individuals                                                                                                       | continuous | 21 |
|  | Transcript factor binding sites                                                     | SNP-SELEX                                                                                                                                                                                      | discrete   | 28 |
|  | Transcript starting sites                                                           | The 2000bp flanking regions about transcript starting sites                                                                                                                                    | discrete   | 36 |

1  
2  
3  
4  
5  
6  
7  
8  
9  
10  
11  
12  
13  
14  
15  
16  
17  
18  
19  
20  
21  
22  
23  
24  
25  
26  
27  
28  
29  
30  
31  
32  
33  
34  
35  
36  
37  
38  
39  
40  
41  
42  
43  
44  
45  
46

|                        |                                  |                                                                                                                                                                    |            |    |
|------------------------|----------------------------------|--------------------------------------------------------------------------------------------------------------------------------------------------------------------|------------|----|
| Sequence level (N = 7) | Blacklisted regions              | Genome regions have anomalous, unstructured, high signal/read counts (DacMapExclude), problematic regions for short sequence tag signal detection (DukeMapExclude) | discrete   | 29 |
|                        | Cross species conservation score | The conservation scoring (phylop46way, phastcon46way) for multiple alignments of 45 vertebrate genomes to the human genome                                         | continuous | 29 |
|                        | GC content                       | GC content calculated with a "span" size of 5 bases                                                                                                                | continuous | 29 |
|                        | Heterochromatin positions        | It is calculated based on H3K9me3 enrichment regions                                                                                                               | discrete   | 30 |
|                        | Human accelerated regions        | Human accelerated regions are conserved genomic loci with elevated divergence in humans                                                                            | discrete   | 31 |

**Table S2.** Individual feature comparisons. This table compares all of the features used in the copy number loss and copy number gain models. The comparisons were made using the two-tailed Wilcoxon rank-sum test, with a significant cut off of  $P = 0.05$ . All the feature names were reformatted as followed: feature type (Fun\_level/Gen\_level/Seq\_level)\_feature names(original sources)\_tissue type (if applicable). Fun: Function; Gen: Gene; Seq: Sequence.

| Source                                                         | Features in copy number loss model                      | P value                          | Source                                                         | Features in copy number gain model                      | P value   |
|----------------------------------------------------------------|---------------------------------------------------------|----------------------------------|----------------------------------------------------------------|---------------------------------------------------------|-----------|
| <b>Functional/<br/>genomic<br/>segment<br/>level</b>           | <i>Fun_level_significant features are 80 out of 120</i> |                                  | <b>Functional/<br/>genomic<br/>segment<br/>level</b>           | <i>Fun_level_significant features are 75 out of 120</i> |           |
| Chromatin<br>states from<br>Roadmap<br>Epigenomic<br>s Project | Fun_level_1_TssA_chromHMM_brain                         | 6.63E-124                        | Chromatin<br>states from<br>Roadmap<br>Epigenomic<br>s Project | Fun_level_1_TssA_chromHMM_brain                         | 3.09E-194 |
|                                                                | Fun_level_10_EnhA2_chromHMM_brain                       | 2.51E-232                        |                                                                | Fun_level_10_EnhA2_chromHMM_brain                       | 2.15E-288 |
|                                                                | Fun_level_11_EnhWk_chromHMM_brain                       | 5.72E-305                        |                                                                | Fun_level_11_EnhWk_chromHMM_brain                       | ~0        |
|                                                                | Fun_level_12_ZNF_chromHMM_brain                         | 1.51E-06                         |                                                                | Fun_level_12_ZNF_chromHMM_brain                         | 3.38E-04  |
|                                                                | Fun_level_13_Het_chromHMM_brain                         | 1.98E-08                         |                                                                | Fun_level_13_Het_chromHMM_brain                         | 1.03E-09  |
|                                                                | Fun_level_14_TssBiv_chromHMM_brain                      | 1.05E-01                         |                                                                | Fun_level_14_TssBiv_chromHMM_brain                      | 2.36E-05  |
|                                                                | Fun_level_15_EnhBiv_chromHMM_brain                      | 2.14E-05                         |                                                                | Fun_level_15_EnhBiv_chromHMM_brain                      | 1.46E-33  |
|                                                                | Fun_level_16_ReprPC_chromHMM_brain                      | 1.60E-08                         |                                                                | Fun_level_16_ReprPC_chromHMM_brain                      | 9.91E-01  |
|                                                                | Fun_level_17_ReprPCWk_chromHMM_brain                    | 4.98E-02                         |                                                                | Fun_level_17_ReprPCWk_chromHMM_brain                    | 5.47E-07  |
|                                                                | Fun_level_18_Quies_chromHMM_brain                       | 1.10E-42                         |                                                                | Fun_level_18_Quies_chromHMM_brain                       | 2.14E-96  |
|                                                                | Fun_level_2_TssFlnk_chromHMM_brain                      | 1.43E-91                         |                                                                | Fun_level_2_TssFlnk_chromHMM_brain                      | 1.95E-146 |
|                                                                | Fun_level_3_TssFlnkU_chromHMM_brain                     | 1.68E-157                        |                                                                | Fun_level_3_TssFlnkU_chromHMM_brain                     | 5.89E-253 |
|                                                                | Fun_level_4_TssFlnkD_chromHMM_brain                     | 3.15E-199                        |                                                                | Fun_level_4_TssFlnkD_chromHMM_brain                     | 2.89E-297 |
|                                                                | Fun_level_5_Tx_chromHMM_brain                           | 4.59E-133                        |                                                                | Fun_level_5_Tx_chromHMM_brain                           | 1.22E-198 |
| Fun_level_6_TxWk_chromHMM_brain                                | 4.35E-290                                               | Fun_level_6_TxWk_chromHMM_brain  | ~0                                                             |                                                         |           |
| Fun_level_7_EnhG1_chromHMM_brain                               | 9.33E-114                                               | Fun_level_7_EnhG1_chromHMM_brain | 9.76E-164                                                      |                                                         |           |

1  
2  
3  
4  
5  
6  
7  
8  
9  
10  
11  
12  
13  
14  
15  
16  
17  
18  
19  
20  
21  
22  
23  
24  
25  
26  
27  
28  
29  
30  
31  
32  
33  
34  
35  
36  
37  
38  
39  
40  
41  
42  
43  
44  
45  
46

|           |                                                  |           |           |                                                  |           |
|-----------|--------------------------------------------------|-----------|-----------|--------------------------------------------------|-----------|
|           | Fun_level_8_EnhG2_chromHMM_brain                 | 2.69E-53  |           | Fun_level_8_EnhG2_chromHMM_brain                 | 9.04E-71  |
|           | Fun_level_9_EnhA1_chromHMM_brain                 | 1.50E-188 |           | Fun_level_9_EnhA1_chromHMM_brain                 | 1.04E-253 |
| Enhancers | Fun_level_dbSUPER_Brain_Angular_Gyrus            | 4.27E-09  | Enhancers | Fun_level_dbSUPER_Brain_Angular_Gyrus            | 3.51E-07  |
|           | Fun_level_dbSUPER_Brain_Anterior_Caudate         | 3.54E-14  |           | Fun_level_dbSUPER_Brain_Anterior_Caudate         | 3.70E-09  |
|           | Fun_level_dbSUPER_Brain_Cingulate_Gyrus          | 6.08E-15  |           | Fun_level_dbSUPER_Brain_Cingulate_Gyrus          | 8.29E-15  |
|           | Fun_level_dbSUPER_Brain_Hippocampus_Middle_150   | 9.98E-15  |           | Fun_level_dbSUPER_Brain_Hippocampus_Middle_150   | 7.05E-11  |
|           | Fun_level_dbSUPER_Brain_Hippocampus_Middle       | 3.29E-19  |           | Fun_level_dbSUPER_Brain_Hippocampus_Middle       | 9.35E-14  |
|           | Fun_level_dbSUPER_Brain_Inferior_Temporal_Lobe   | 1.30E-17  |           | Fun_level_dbSUPER_Brain_Inferior_Temporal_Lobe   | 1.62E-14  |
|           | Fun_level_dbSUPER_Brain_Mid_Frontal_Lobe         | 2.93E-02  |           | Fun_level_dbSUPER_Brain_Mid_Frontal_Lobe         | 2.66E-02  |
|           | Fun_level_famton_astrocyte                       | 3.96E-04  |           | Fun_level_famton_astrocyte                       | 2.30E-02  |
|           | Fun_level_famton_brain                           | 4.89E-01  |           | Fun_level_famton_brain                           | 6.62E-01  |
|           | Fun_level_famton_CL:0000127                      | 9.29E-05  |           | Fun_level_famton_CL:0000127                      | 8.25E-06  |
|           | Fun_level_famton_count                           | 1.29E-170 |           | Fun_level_famton_count                           | 1.99E-252 |
|           | Fun_level_famton_neuronal_stem_cell              | 3.28E-01  |           | Fun_level_famton_neuronal_stem_cell              | 6.99E-01  |
|           | Fun_level_famton_permssive                       | 2.26E-129 |           | Fun_level_famton_permssive                       | 3.25E-147 |
|           | Fun_level_enhancerAtlas_Astrocyte_EP             | 3.90E-40  |           | Fun_level_enhancerAtlas_Astrocyte_EP             | 1.32E-89  |
|           | Fun_level_enhancerAtlas_Cerebellum_EP            | 9.56E-61  |           | Fun_level_enhancerAtlas_Cerebellum_EP            | 5.46E-104 |
|           | Fun_level_enhancerAtlas_ESC_neuron_EP            | 3.51E-25  |           | Fun_level_enhancerAtlas_ESC_neuron_EP            | 2.70E-37  |
|           | Fun_level_gene_enhancer_links_brain_enhcenter    | 2.04E-277 |           | Fun_level_gene_enhancer_links_brain_enhcenter    | ~0        |
|           | Fun_level_gene_enhancer_links_neurosph_enhcenter | 6.76E-239 |           | Fun_level_gene_enhancer_links_neurosph_enhcenter | ~0        |
|           | Fun_level_hacer_T1                               | 1.24E-73  |           | Fun_level_hacer_T1                               | 5.71E-136 |
|           | Fun_level_SE_ele                                 | 2.61E-39  |           | Fun_level_SE_ele                                 | 2.03E-79  |

|                                    |                                       |           |                                    |                                       |           |
|------------------------------------|---------------------------------------|-----------|------------------------------------|---------------------------------------|-----------|
|                                    | Fun_level_SEA00101                    | 1.16E-43  |                                    | Fun_level_SEA00101                    | 6.05E-66  |
|                                    | Fun_level_nott_Astrocyte_enhancers    | 1.69E-155 |                                    | Fun_level_nott_Astrocyte_enhancers    | 1.75E-222 |
|                                    | Fun_level_nott_Astrocyte_promoters    | 1.42E-87  |                                    | Fun_level_nott_Astrocyte_promoters    | 3.97E-149 |
|                                    | Fun_level_nott_H3K4me3_around_TSS     | 6.28E-84  |                                    | Fun_level_nott_H3K4me3_around_TSS     | 1.46E-139 |
|                                    | Fun_level_nott_Microglia_enhancers    | 1.03E-79  |                                    | Fun_level_nott_Microglia_enhancers    | 4.05E-123 |
|                                    | Fun_level_nott_Microglia_promoters    | 5.38E-67  |                                    | Fun_level_nott_Microglia_promoters    | 3.48E-125 |
|                                    | Fun_level_nott_Neuronal_enhancers     | 1.52E-301 |                                    | Fun_level_nott_Neuronal_enhancers     | ~0        |
|                                    | Fun_level_nott_Neuronal_promoters     | 3.73E-87  |                                    | Fun_level_nott_Neuronal_promoters     | 1.89E-137 |
|                                    | Fun_level_nott_Oligo_enhancers        | 6.43E-164 |                                    | Fun_level_nott_Oligo_enhancers        | 7.10E-221 |
|                                    | Fun_level_nott_Oligo_promoters        | 1.42E-92  |                                    | Fun_level_nott_Oligo_promoters        | 2.70E-151 |
|                                    | Fun_level_nott_superEnhancer          | 1.00E+00  |                                    | Fun_level_nott_superEnhancer          | 1.00E+00  |
|                                    | Fun_level_vista                       | 9.93E-07  |                                    | Fun_level_vista                       | 9.38E-07  |
| CTCF binding sites                 | Fun_level_ctcf                        | 2.25E-65  | CTCF binding sites                 | Fun_level_ctcf                        | 6.96E-112 |
|                                    | Fun_level_CTCF_observed_Brain         | ~0        |                                    | Fun_level_CTCF_observed_Brain         | ~0        |
| DNase hypersensitive sites         | Fun_level_DNaseIClusterd              | 1.82E-49  | DNase hypersensitive sites         | Fun_level_DNaseIClusterd              | 1.69E-61  |
|                                    | Fun_level_DnaseMaster                 | 1.49E-73  |                                    | Fun_level_DnaseMaster                 | 2.90E-96  |
|                                    | Fun_level_DNase-seq_observed_Brain    | ~0        |                                    | Fun_level_DNase-seq_observed_Brain    | ~0        |
|                                    | Fun_level_DNase-seq_observed_Neurosph | ~0        |                                    | Fun_level_DNase-seq_observed_Neurosph | ~0        |
| Genomic segmentations from Gencode | Fun_level_EncodeAvgTfbsBroadNhaCtcf   | 3.30E-76  | Genomic segmentations from Gencode | Fun_level_EncodeAvgTfbsBroadNhaCtcf   | 4.70E-150 |
|                                    | Fun_level_EncodeRegTfbsClustered      | 2.01E-45  |                                    | Fun_level_EncodeRegTfbsClustered      | 3.01E-147 |
|                                    | Fun_level_gencode_CDS                 | 3.68E-17  |                                    | Fun_level_gencode_CDS                 | 4.60E-62  |
|                                    | Fun_level_gencode_exon                | 5.44E-01  |                                    | Fun_level_gencode_exon                | 5.12E-07  |
|                                    | Fun_level_gencode_gene                | 2.45E-22  |                                    | Fun_level_gencode_gene                | 1.60E-26  |
|                                    | Fun_level_gencode_Selenocysteine      | 5.45E-01  |                                    | Fun_level_gencode_Selenocysteine      | 6.28E-01  |
|                                    | Fun_level_gencode_start_codon         | 2.45E-01  |                                    | Fun_level_gencode_start_codon         | 6.60E-19  |



1  
2  
3  
4  
5  
6  
7  
8  
9  
10  
11  
12  
13  
14  
15  
16  
17  
18  
19  
20  
21  
22  
23  
24  
25  
26  
27  
28  
29  
30  
31  
32  
33  
34  
35  
36  
37  
38  
39  
40  
41  
42  
43  
44  
45  
46

|                                     |                                     |                                     |                 |                                     |           |
|-------------------------------------|-------------------------------------|-------------------------------------|-----------------|-------------------------------------|-----------|
|                                     | Fun_level_gencode_stop_codon        | 7.36E-06                            |                 | Fun_level_gencode_stop_codon        | 1.77E-25  |
|                                     | Fun_level_gencode_transcript        | 8.59E-01                            |                 | Fun_level_gencode_transcript        | 8.33E-01  |
|                                     | Fun_level_gencode_UTR               | 2.94E-12                            |                 | Fun_level_gencode_UTR               | 3.42E-41  |
|                                     | Fun_level_miRNA                     | 1.84E-125                           |                 | Fun_level_miRNA                     | 5.54E-245 |
|                                     | Fun_level_non-codingRNAs            | 1.24E-15                            |                 | Fun_level_non-codingRNAs            | 1.00E-03  |
| Histone markers                     | Fun_level_ATAC-seq_observed_Brain   | ~0                                  | Histone markers | Fun_level_ATAC-seq_observed_Brain   | ~0        |
|                                     | Fun_level_H2AFZ_imputed_Brain       | ~0                                  |                 | Fun_level_H2AFZ_imputed_Brain       | ~0        |
|                                     | Fun_level_EP300_imputed_Brain       | ~0                                  |                 | Fun_level_EP300_imputed_Brain       | ~0        |
|                                     | Fun_level_EP300_imputed_Neurosph    | ~0                                  |                 | Fun_level_EP300_imputed_Neurosph    | ~0        |
|                                     | Fun_level_H2AFZ_imputed_Neurosph    | ~0                                  |                 | Fun_level_H2AFZ_imputed_Neurosph    | ~0        |
|                                     | Fun_level_H2AFZ_observed_Brain      | ~0                                  |                 | Fun_level_H2AFZ_observed_Brain      | ~0        |
|                                     | Fun_level_H3k27ac                   | 7.28E-91                            |                 | Fun_level_H3k27ac                   | 6.19E-90  |
|                                     | Fun_level_H3K27ac_imputed_Brain     | ~0                                  |                 | Fun_level_H3K27ac_imputed_Brain     | ~0        |
|                                     | Fun_level_H3K27ac_imputed_Neurosph  | ~0                                  |                 | Fun_level_H3K27ac_imputed_Neurosph  | ~0        |
|                                     | Fun_level_H3K27ac_observed_Brain    | ~0                                  |                 | Fun_level_H3K27ac_observed_Brain    | ~0        |
|                                     | Fun_level_H3K27ac_observed_Neurosph | ~0                                  |                 | Fun_level_H3K27ac_observed_Neurosph | ~0        |
|                                     | Fun_level_H3K27me3_imputed_Brain    | 5.90E-280                           |                 | Fun_level_H3K27me3_imputed_Brain    | ~0        |
|                                     | Fun_level_H3K27me3_imputed_Neurosph | 7.54E-278                           |                 | Fun_level_H3K27me3_imputed_Neurosph | ~0        |
|                                     | Fun_level_H3K27me3_observed_Brain   | 5.33E-109                           |                 | Fun_level_H3K27me3_observed_Brain   | 1.41E-239 |
|                                     | Fun_level_H3k4me1                   | 1.12E-95                            |                 | Fun_level_H3k4me1                   | 1.55E-83  |
|                                     | Fun_level_H3K4me1_imputed_Brain     | ~0                                  |                 | Fun_level_H3K4me1_imputed_Brain     | ~0        |
|                                     | Fun_level_H3K4me1_imputed_Neurosph  | ~0                                  |                 | Fun_level_H3K4me1_imputed_Neurosph  | ~0        |
| Fun_level_H3K4me1_observed_Brain    | ~0                                  | Fun_level_H3K4me1_observed_Brain    | ~0              |                                     |           |
| Fun_level_H3K4me1_observed_Neurosph | ~0                                  | Fun_level_H3K4me1_observed_Neurosph | ~0              |                                     |           |
| Fun_level_H3K4me2_observed_Brain    | ~0                                  | Fun_level_H3K4me2_observed_Brain    | ~0              |                                     |           |

|                              |                                         |           |                              |                                         |           |
|------------------------------|-----------------------------------------|-----------|------------------------------|-----------------------------------------|-----------|
|                              | Fun_level_H3k4me3                       | 2.24E-26  |                              | Fun_level_H3k4me3                       | 8.36E-17  |
|                              | Fun_level_H3K4me3_imputed_Brain         | 5.80E-02  |                              | Fun_level_H3K4me3_imputed_Brain         | 4.68E-01  |
|                              | Fun_level_H3K4me3_imputed_Neurosph      | ~0        |                              | Fun_level_H3K4me3_imputed_Neurosph      | ~0        |
|                              | Fun_level_H3K4me3_observed_Brain        | 5.92E-02  |                              | Fun_level_H3K4me3_observed_Brain        | 4.71E-01  |
|                              | Fun_level_H3K4me3_observed_Neurosph     | ~0        |                              | Fun_level_H3K4me3_observed_Neurosph     | ~0        |
|                              | Fun_level_H3K9ac_imputed_Brain          | ~0        |                              | Fun_level_H3K9ac_imputed_Brain          | ~0        |
|                              | Fun_level_H3K9ac_imputed_Neurosph       | ~0        |                              | Fun_level_H3K9ac_imputed_Neurosph       | ~0        |
|                              | Fun_level_H3K9me3_imputed_Brain         | 3.25E-75  |                              | Fun_level_H3K9me3_imputed_Brain         | 9.60E-177 |
|                              | Fun_level_H3K9me3_imputed_Neurosph      | 2.39E-122 |                              | Fun_level_H3K9me3_imputed_Neurosph      | 7.66E-231 |
|                              | Fun_level_H3K9me3_observed_Brain        | 4.50E-61  |                              | Fun_level_H3K9me3_observed_Brain        | 3.22E-160 |
|                              | Fun_level_H3K9me3_observed_Neurosph     | 1.74E-20  |                              | Fun_level_H3K9me3_observed_Neurosph     | 3.66E-53  |
|                              | Fun_level_H4K20me1_imputed_Neurosph     | ~0        |                              | Fun_level_H4K20me1_imputed_Neurosph     | ~0        |
|                              | Fun_level_H4K20me1_observed_Brain       | ~0        |                              | Fun_level_H4K20me1_observed_Brain       | ~0        |
|                              | Fun_level_POLR2A_imputed_Neurosph       | ~0        |                              | Fun_level_POLR2A_imputed_Neurosph       | ~0        |
|                              | Fun_level_RAD21_imputed_Brain           | ~0        |                              | Fun_level_RAD21_imputed_Brain           | ~0        |
|                              | Fun_level_RAD21_imputed_Neurosph        | ~0        |                              | Fun_level_RAD21_imputed_Neurosph        | ~0        |
|                              | Fun_level_SMC3_imputed_Brain            | ~0        |                              | Fun_level_SMC3_imputed_Brain            | ~0        |
|                              | Fun_level_SMC3_imputed_Neurosph         | ~0        |                              | Fun_level_SMC3_imputed_Neurosph         | ~0        |
| Long range probable genes    | Fun_level_liu_csbj_targetgene           | 1.62E-22  | Long range probable genes    | Fun_level_liu_csbj_targetgene           | 1.14E-43  |
| Methylation                  | Fun_level_methMCRF                      | 1.06E-154 | Methylation                  | Fun_level_methMCRF                      | 1.46E-257 |
| Loop anchors and topological | Fun_level_PsychENCODE_CBC_H3K27ac       | 8.71E-57  | Loop anchors and topological | Fun_level_PsychENCODE_CBC_H3K27ac       | 4.13E-65  |
|                              | Fun_level_PsychENCODE_HiC_EP            | 1.44E-53  |                              | Fun_level_PsychENCODE_HiC_EP            | 7.19E-84  |
|                              | Fun_level_PsychENCODE_loops_interRegion | 6.15E-07  |                              | Fun_level_PsychENCODE_loops_interRegion | 1.89E-01  |

1  
2  
3  
4  
5  
6  
7  
8  
9  
10  
11  
12  
13  
14  
15  
16  
17  
18  
19  
20  
21  
22  
23  
24  
25  
26  
27  
28  
29  
30  
31  
32  
33  
34  
35  
36  
37  
38  
39  
40  
41  
42  
43  
44  
45  
46

|                                                        |                                                            |           |                                                        |                                                            |           |
|--------------------------------------------------------|------------------------------------------------------------|-----------|--------------------------------------------------------|------------------------------------------------------------|-----------|
| associated domains in higher-order chromatin structure | Fun_level_PsychENCODE_PEC_Enhancers                        | 2.61E-158 | associated domains in higher-order chromatin structure | Fun_level_PsychENCODE_PEC_Enhancers                        | 3.36E-192 |
|                                                        | Fun_level_PsychENCODE_PFC_H3K27ac                          | 3.08E-152 |                                                        | Fun_level_PsychENCODE_PFC_H3K27ac                          | 2.05E-184 |
|                                                        | Fun_level_PsychENCODE_TAR                                  | 6.89E-41  |                                                        | Fun_level_PsychENCODE_TAR                                  | 1.40E-83  |
|                                                        | Fun_level_PsychENCODE_TC_H3K27ac                           | 5.58E-204 |                                                        | Fun_level_PsychENCODE_TC_H3K27ac                           | 1.86E-265 |
|                                                        | Fun_level_TAD56                                            | 7.60E-149 |                                                        | Fun_level_TAD56                                            | 1.18E-172 |
| DNase hypersensitive sites                             | Fun_level_RoadmapDNasePromCount                            | 7.33E-34  | DNase hypersensitive sites                             | Fun_level_RoadmapDNasePromCount                            | 7.61E-74  |
| Transcript factor binding sites from snp-selex         | Fun_level_snp_selex                                        | 8.60E-02  | Transcript factor binding sites from snp-selex         | Fun_level_snp_selex                                        | 4.03E-02  |
| Transcript starting sites                              | Fun_level_tss2000bp                                        | 2.78E-06  | Transcript starting sites                              | Fun_level_tss2000bp                                        | 1.45E-01  |
| Higher-order chromatin structure from Yue lab          | Fun_level_yue_loops_hippo                                  | 4.56E-133 | Higher-order chromatin structure from Yue lab          | Fun_level_yue_loops_hippo                                  | 1.26E-135 |
| <b>Gene level</b>                                      | <i>The Gen_level_significant features are 34 out of 45</i> |           | <b>Gene level</b>                                      | <i>The Gen_level_significant features are 25 out of 45</i> |           |
| ClinGen curated                                        | Gen_level_ClinGen_haploinsufficiency_gene_0                | 1.29E-03  | ClinGen curated                                        | Gen_level_ClinGen_region_curation_Triplosensitivity_0      | 4.45E-01  |

|                           |                                                         |          |                           |                                                        |          |
|---------------------------|---------------------------------------------------------|----------|---------------------------|--------------------------------------------------------|----------|
| genes and genomic regions | Gen_level_ClinGen_haploinsufficiency_gene_1             | 8.63E-03 | genes and genomic regions | Gen_level_ClinGen_region_curation_Triplosensitivity_1  | 4.03E-01 |
|                           | Gen_level_ClinGen_haploinsufficiency_gene_2             | 5.95E-01 |                           | Gen_level_ClinGen_region_curation_Triplosensitivity_2  | 6.03E-02 |
|                           | Gen_level_ClinGen_haploinsufficiency_gene_3             | 6.19E-07 |                           | Gen_level_ClinGen_region_curation_Triplosensitivity_3  | 3.88E-01 |
|                           | Gen_level_ClinGen_haploinsufficiency_gene_30            | 1.07E-12 |                           | Gen_level_ClinGen_region_curation_Triplosensitivity_40 | 4.33E-12 |
|                           | Gen_level_ClinGen_haploinsufficiency_gene_40            | 7.01E-01 |                           | Gen_level_ClinGen_triplosensitivity_gene               | 7.80E-01 |
|                           | Gen_level_ClinGen_region_curation_Haploinsufficiency_0  | 8.02E-01 |                           | Gen_level_ClinGen_triplosensitivity_gene_0             | 1.10E-30 |
|                           | Gen_level_ClinGen_region_curation_Haploinsufficiency_1  | 8.83E-01 |                           | Gen_level_ClinGen_triplosensitivity_gene_1             | 9.07E-01 |
|                           | Gen_level_ClinGen_region_curation_Haploinsufficiency_2  | 8.13E-01 |                           | Gen_level_ClinGen_triplosensitivity_gene_2             | 9.41E-01 |
|                           | Gen_level_ClinGen_region_curation_Haploinsufficiency_3  | 1.09E-03 |                           | Gen_level_ClinGen_triplosensitivity_gene_3             | 1.00E+00 |
|                           | Gen_level_ClinGen_region_curation_Haploinsufficiency_30 | 9.29E-01 |                           | Gen_level_ClinGen_triplosensitivity_gene_30            | 1.00E+00 |
|                           | Gen_level_ClinGen_region_curation_Haploinsufficiency_40 | 2.03E-19 |                           | Gen_level_ClinGen_triplosensitivity_gene_40            | 1.00E+00 |
|                           | Gen_level_loss_of_function_score1                       | 2.61E-03 |                           | Gen_level_gain_activating_score1                       | 8.03E-01 |
|                           | Gen_level_loss_of_function_score2                       | 2.72E-06 |                           | Gen_level_gain_activating_score2                       | 6.81E-01 |
|                           | Gen_level_loss_of_function_score3                       | 9.89E-25 |                           | Gen_level_gain_activating_score3                       | 2.84E-01 |

|                                          |                                       |                      |                                          |                                       |            |
|------------------------------------------|---------------------------------------|----------------------|------------------------------------------|---------------------------------------|------------|
| Dosage sensitive genes                   | Gen_level_Collins_rCNV_PLIgenes_PHI   | 0 $\infty$           | Dosage sensitive genes                   | Gen_level_Collins_rCNV_PLIgenes_PTS   | 0 $\infty$ |
| DDG2P database                           | Gen_level_ddg2p_loss                  | 2.66E-55             | DDG2P database                           | Gen_level_ddg2p_gain                  | 6.90E-02   |
| Cell essential and nonessential genes    | Gen_level_Essential_in_culture_CRISPR | 9.29E-05             | Cell essential and nonessential genes    | Gen_level_Essential_in_culture_CRISPR | 6.25E-13   |
|                                          | Gen_nonEssential_in_culture_CRISPR    | 3.02E-01             |                                          | Gen_nonEssential_in_culture_CRISPR    | 6.10E-01   |
| FDA proved drug target                   | Gen_level_FDA-approved_drug_targets   | 1.30E-03             | FDA proved drug target                   | Gen_level_FDA-approved_drug_targets   | 9.60E-06   |
| G protein-coupled receptor               | Gen_level_gpcr_union                  | 4.01E-01             | G protein-coupled receptor               | Gen_level_gpcr_union                  | 2.83E-04   |
| Neurodevelopmental process related genes | Gen_level_HP_0000707                  | 4.37E-67             | Neurodevelopmental process related genes | Gen_level_HP_0000707                  | 2.00E-76   |
|                                          | Gen_level_HP_0000708                  | 1.53E-35             |                                          | Gen_level_HP_0000708                  | 1.08E-34   |
|                                          | Gen_level_HP_0000717                  | 7.64E-04             |                                          | Gen_level_HP_0000717                  | 3.17E-03   |
|                                          | Gen_level_HP_0000729                  | 2.70E-11             |                                          | Gen_level_HP_0000729                  | 4.92E-07   |
|                                          | Gen_level_HP_0000752                  | 8.38E-09             |                                          | Gen_level_HP_0000752                  | 1.85E-05   |
|                                          | Gen_level_HP_0001197                  | 3.76E-08             |                                          | Gen_level_HP_0001197                  | 1.66E-12   |
|                                          | Gen_level_HP_0001250                  | 1.96E-33             |                                          | Gen_level_HP_0001250                  | 3.00E-31   |
|                                          | Gen_level_HP_0001507                  | 1.02E-47             |                                          | Gen_level_HP_0001507                  | 6.01E-56   |
|                                          | Gen_level_HP_0002011                  | 3.35E-49             |                                          | Gen_level_HP_0002011                  | 5.05E-55   |
|                                          | Gen_level_HP_0002715                  | 3.12E-29             |                                          | Gen_level_HP_0002715                  | 7.10E-33   |
| Gen_level_HP_0002960                     | 7.04E-01                              | Gen_level_HP_0002960 | 3.47E-01                                 |                                       |            |

|                               |                                                          |          |                               |                                                          |          |
|-------------------------------|----------------------------------------------------------|----------|-------------------------------|----------------------------------------------------------|----------|
|                               | Gen_level_HP_0011446                                     | 5.78E-55 |                               | Gen_level_HP_0011446                                     | 2.19E-59 |
|                               | Gen_level_HP_0012443                                     | 8.08E-50 |                               | Gen_level_HP_0012443                                     | 4.97E-53 |
|                               | Gen_level_HP_0012638                                     | 2.46E-65 |                               | Gen_level_HP_0012638                                     | 4.90E-75 |
|                               | Gen_level_HP_0012639                                     | 4.94E-52 |                               | Gen_level_HP_0012639                                     | 2.73E-58 |
|                               | Gen_level_HP_0012759                                     | 6.99E-62 |                               | Gen_level_HP_0012759                                     | 1.26E-61 |
|                               | Gen_level_HP_0025031                                     | 2.95E-46 |                               | Gen_level_HP_0025031                                     | 1.56E-57 |
|                               | Gen_level_HP_0031466                                     | 2.42E-09 |                               | Gen_level_HP_0031466                                     | 1.77E-08 |
|                               | Gen_level_HP_0100022                                     | 2.12E-38 |                               | Gen_level_HP_0100022                                     | 2.70E-44 |
|                               | Gen_level_HP_0100753                                     | 1.32E-01 |                               | Gen_level_HP_0100753                                     | 8.25E-01 |
|                               | Gen_level_HP_0100852                                     | 3.88E-04 |                               | Gen_level_HP_0100852                                     | 8.91E-04 |
| Mouse heterozygous LoF lethal | Gen_level_mgi_essential_gene                             | 1.42E-56 | Mouse heterozygous LoF lethal | Gen_level_mgi_essential_gene                             | 7.08E-81 |
| Olfactory receptors           | Gen_level_Olfactory_receptors_mainland                   | 6.60E-03 | Olfactory receptors           | Gen_level_Olfactory_receptors_mainland                   | 6.10E-01 |
| Sfari gene                    | Gen_level_sfari_gene                                     | 1.81E-30 | Sfari gene                    | Gen_level_sfari_gene                                     | 8.84E-22 |
| <b>Sequence level</b>         | <i>The Seq_level_significant features are 7 out of 7</i> |          | <b>Sequence level</b>         | <i>The Seq_level_significant features are 6 out of 7</i> |          |
| Blacklisted regions           | Seq_level_DacMapExclude                                  | 4.23E-15 | Blacklisted regions           | Seq_level_DacMapExclude                                  | 5.88E-31 |
| Sfari gene                    | Seq_level_DukeMapExclude                                 | 2.42E-26 | Sfari gene                    | Seq_level_DukeMapExclude                                 | 3.62E-60 |
| GC content                    | Seq_level_GC                                             | 7.26E-10 | GC content                    | Seq_level_GC                                             | 8.61E-30 |
| Human accelerated             | Seq_level_HAR                                            | 8.53E-03 | Human accelerated             | Seq_level_HAR                                            | 2.01E-01 |

1  
2  
3  
4  
5  
6  
7  
8  
9  
10  
11  
12  
13  
14  
15  
16  
17  
18  
19  
20  
21  
22  
23  
24  
25  
26  
27  
28  
29  
30  
31  
32  
33  
34  
35  
36  
37  
38  
39  
40  
41  
42  
43  
44  
45  
46

|                                                                                                                   |                          |          |                                                                                                                   |                          |          |
|-------------------------------------------------------------------------------------------------------------------|--------------------------|----------|-------------------------------------------------------------------------------------------------------------------|--------------------------|----------|
| regions<br>Heterochro<br>matin<br>positions                                                                       |                          |          | regions<br>Heterochro<br>matin<br>positions                                                                       |                          |          |
| Human<br>accelerated<br>regions<br>Heterochro<br>matin<br>positions<br>Cross<br>species<br>conservatio<br>n score | Seq_level_HetDomain      | 3.54E-63 | Human<br>accelerated<br>regions<br>Heterochro<br>matin<br>positions<br>Cross<br>species<br>conservatio<br>n score | Seq_level_HetDomain      | 1.50E-60 |
|                                                                                                                   | Seq_level_phastCons46way | 1.04E-29 |                                                                                                                   | Seq_level_phastCons46way | 1.07E-91 |
| Human<br>accelerated<br>regions                                                                                   | Seq_level_phyloP46way    | 3.62E-19 | Human<br>accelerated<br>regions                                                                                   | Seq_level_phyloP46way    | 1.82E-15 |

**Table S3.** Feature importancy. In the copy number loss and copy number gain models, we calculated feature importancy.  $P = 0.05$  is set as the significant level. All the feature names were reformatted as feature names (original sources)\_tissue type (if applicable).

| Features in copy number loss model | Feature importancy | Features in copy number gain model | Feature importancy |
|------------------------------------|--------------------|------------------------------------|--------------------|
| 1_TssA_chromHMM_brain              | 5.34E-03           | 1_TssA_chromHMM_brain              | 5.58E-03           |
| 10_EnhA2_chromHMM_brain            | 7.75E-03           | 10_EnhA2_chromHMM_brain            | 4.92E-03           |
| 11_EnhWk_chromHMM_brain            | 1.38E-02           | 11_EnhWk_chromHMM_brain            | 9.25E-03           |
| 12_ZNF_chromHMM_brain              | 4.61E-03           | 12_ZNF_chromHMM_brain              | 4.92E-03           |
| 13_Het_chromHMM_brain              | 5.81E-03           | 13_Het_chromHMM_brain              | 5.78E-03           |
| 14_TssBiv_chromHMM_brain           | 4.27E-03           | 14_TssBiv_chromHMM_brain           | 4.13E-03           |
| 15_EnhBiv_chromHMM_brain           | 5.65E-03           | 15_EnhBiv_chromHMM_brain           | 6.17E-03           |
| 16_ReprPC_chromHMM_brain           | 4.25E-03           | 16_ReprPC_chromHMM_brain           | 4.11E-03           |
| 17_ReprPCWk_chromHMM_brain         | 5.42E-03           | 17_ReprPCWk_chromHMM_brain         | 5.54E-03           |
| 18_Quies_chromHMM_brain            | 6.22E-03           | 18_Quies_chromHMM_brain            | 7.34E-03           |
| 2_TssFlnk_chromHMM_brain           | 4.47E-03           | 2_TssFlnk_chromHMM_brain           | 4.31E-03           |
| 3_TssFlnkU_chromHMM_brain          | 4.67E-03           | 3_TssFlnkU_chromHMM_brain          | 4.55E-03           |
| 4_TssFlnkD_chromHMM_brain          | 7.33E-03           | 4_TssFlnkD_chromHMM_brain          | 5.30E-03           |
| 5_Tx_chromHMM_brain                | 4.64E-03           | 5_Tx_chromHMM_brain                | 5.06E-03           |
| 6_TxWk_chromHMM_brain              | 4.98E-03           | 6_TxWk_chromHMM_brain              | 4.75E-03           |
| 7_EnhG1_chromHMM_brain             | 4.54E-03           | 7_EnhG1_chromHMM_brain             | 4.40E-03           |
| 8_EnhG2_chromHMM_brain             | 4.72E-03           | 8_EnhG2_chromHMM_brain             | 5.37E-03           |
| 9_EnhA1_chromHMM_brain             | 5.45E-03           | 9_EnhA1_chromHMM_brain             | 4.83E-03           |
| ATAC-seq_observed_Brain            | 5.82E-03           | ATAC-seq_observed_Brain            | 5.96E-03           |
| Brain_Angular_Gyrus_dbSUPER        | 4.18E-03           | Brain_Angular_Gyrus_dbSUPER        | 3.47E-03           |
| Brain_Anterior_Caudate_dbSUPER     | 4.33E-03           | Brain_Anterior_Caudate_dbSUPER     | 5.08E-03           |
| Brain_Cingulate_Gyrus_dbSUPER      | 3.99E-03           | Brain_Cingulate_Gyrus_dbSUPER      | 3.93E-03           |



|                                               |          |                                              |          |
|-----------------------------------------------|----------|----------------------------------------------|----------|
| Brain_Hippocampus_Middle_150_dbSUPER          | 4.54E-03 | Brain_Hippocampus_Middle_150_dbSUPER         | 6.33E-03 |
| Brain_Hippocampus_Middle_dbSUPER              | 3.94E-03 | Brain_Hippocampus_Middle_dbSUPER             | 4.19E-03 |
| Brain_Inferior_Temporal_Lobe_dbSUPER          | 3.47E-03 | Brain_Inferior_Temporal_Lobe_dbSUPER         | 5.37E-03 |
| Brain_Mid_Frontal_Lobe_dbSUPER                | 4.99E-03 | Brain_Mid_Frontal_Lobe_dbSUPER               | 7.03E-03 |
| ClinGen_haploinsufficiency_gene_0             | 3.71E-03 | ClinGen_region_curation_Triplosensitivity_0  | 2.24E-03 |
| ClinGen_haploinsufficiency_gene_1             | 5.91E-03 | ClinGen_region_curation_Triplosensitivity_1  | 7.05E-03 |
| ClinGen_haploinsufficiency_gene_2             | 0        | ClinGen_region_curation_Triplosensitivity_2  | 6.10E-03 |
| ClinGen_haploinsufficiency_gene_3             | 9.43E-03 | ClinGen_region_curation_Triplosensitivity_3  | 5.38E-03 |
| ClinGen_haploinsufficiency_gene_30            | 4.80E-03 | ClinGen_region_curation_Triplosensitivity_40 | 1.01E-02 |
| ClinGen_haploinsufficiency_gene_40            | 1.14E-03 | ClinGen_triplosensitivity_gene               | 0        |
| ClinGen_region_curation_Haploinsufficiency_0  | 4.63E-03 | ClinGen_triplosensitivity_gene_0             | 6.16E-03 |
| ClinGen_region_curation_Haploinsufficiency_1  | 0        | ClinGen_triplosensitivity_gene_1             | 0        |
| ClinGen_region_curation_Haploinsufficiency_2  | 2.59E-03 | ClinGen_triplosensitivity_gene_2             | 0        |
| ClinGen_region_curation_Haploinsufficiency_3  | 4.81E-03 | ClinGen_triplosensitivity_gene_3             | 0        |
| ClinGen_region_curation_Haploinsufficiency_30 | 0        | ClinGen_triplosensitivity_gene_30            | 0        |
| ClinGen_region_curation_Haploinsufficiency_40 | 1.05E-02 | ClinGen_triplosensitivity_gene_40            | 0        |
| Collins_rCNV_PLIgenes_PHI                     | 5.24E-02 | Collins_rCNV_PLIgenes_PTS                    | 6.53E-02 |
| ctcf                                          | 5.27E-03 | ctcf                                         | 4.46E-03 |
| CTCF_observed_Brain                           | 4.34E-03 | CTCF_observed_Brain                          | 5.10E-03 |
| DacMapExclude                                 | 5.65E-03 | DacMapExclude                                | 8.93E-03 |
| ddg2p_loss                                    | 7.51E-03 | ddg2p_gain                                   | 3.54E-03 |
| DNaseIClusterd                                | 4.23E-03 | DNaseIClusterd                               | 4.51E-03 |
| DnaseMaster                                   | 5.52E-03 | DnaseMaster                                  | 4.98E-03 |
| DNase-seq_observed_Brain                      | 1.11E-02 | DNase-seq_observed_Brain                     | 1.08E-02 |
| DNase-seq_observed_NeurospH                   | 2.30E-02 | DNase-seq_observed_NeurospH                  | 2.24E-02 |

|                             |          |                             |          |
|-----------------------------|----------|-----------------------------|----------|
| DukeMapExclude              | 6.33E-03 | DukeMapExclude              | 8.47E-03 |
| EncodeAwgTfbsBroadNhaCtcf   | 5.10E-03 | EncodeAwgTfbsBroadNhaCtcf   | 4.79E-03 |
| EncodeRegTfbsClustered      | 4.86E-03 | EncodeRegTfbsClustered      | 5.60E-03 |
| enhancerAtlas_Astrocyte_EP  | 3.41E-03 | enhancerAtlas_Astrocyte_EP  | 6.82E-03 |
| enhancerAtlas_Cerebellum_EP | 4.23E-03 | enhancerAtlas_Cerebellum_EP | 4.91E-03 |
| enhancerAtlas_ESC_neuron_EP | 3.34E-03 | enhancerAtlas_ESC_neuron_EP | 4.45E-03 |
| EP300_imputed_Brain         | 4.79E-03 | EP300_imputed_Brain         | 4.00E-03 |
| EP300_imputed_Neuropsph     | 5.06E-03 | EP300_imputed_Neuropsph     | 5.47E-03 |
| Essential_in_culture_CRISPR | 3.85E-03 | Essential_in_culture_CRISPR | 5.13E-03 |
| famton_astrocyte            | 3.93E-03 | famton_astrocyte            | 6.99E-03 |
| famton_brain                | 6.68E-03 | famton_brain                | 5.28E-03 |
| famton_CL:0000127           | 3.45E-03 | famton_CL:0000127           | 3.77E-03 |
| famton_count                | 5.37E-03 | famton_count                | 6.22E-03 |
| famton_neuronal_stem_cell   | 4.61E-03 | famton_neuronal_stem_cell   | 3.17E-03 |
| famton_permssive            | 4.56E-03 | famton_permssive            | 5.03E-03 |
| FDA-approved_drug_targets   | 4.03E-03 | FDA-approved_drug_targets   | 4.57E-03 |
| GC                          | 6.47E-03 | gain_activating_score1      | 0        |
| gencode_CDS                 | 9.24E-03 | gain_activating_score2      | 0        |
| gencode_exon                | 7.74E-03 | gain_activating_score3      | 1.80E-03 |
| gencode_gene                | 7.42E-03 | GC                          | 5.89E-03 |
| gencode_Selenocysteine      | 0        | gencode_CDS                 | 9.60E-03 |
| gencode_start_codon         | 2.08E-02 | gencode_exon                | 2.11E-02 |
| gencode_stop_codon          | 3.54E-03 | gencode_gene                | 7.17E-03 |
| gencode_transcript          | 4.69E-03 | gencode_Selenocysteine      | 4.83E-04 |
| gencode_UTR                 | 5.77E-03 | gencode_start_codon         | 8.60E-03 |

1  
2  
3  
4  
5  
6  
7  
8  
9  
10  
11  
12  
13  
14  
15  
16  
17  
18  
19  
20  
21  
22  
23  
24  
25  
26  
27  
28  
29  
30  
31  
32  
33  
34  
35  
36  
37  
38  
39  
40  
41  
42  
43  
44  
45  
46

|                                        |          |                                        |          |
|----------------------------------------|----------|----------------------------------------|----------|
| gene_enhancer_links_brain_enhcenter    | 5.55E-03 | gencode_stop_codon                     | 4.29E-03 |
| gene_enhancer_links_neurosph_enhcenter | 6.37E-03 | gencode_transcript                     | 5.05E-03 |
| gpcr_union                             | 3.95E-03 | gencode_UTR                            | 4.27E-03 |
| H2AFZ_imputed_Brain                    | 4.28E-03 | gene_enhancer_links_brain_enhcenter    | 4.33E-03 |
| H2AFZ_imputed_Neurosph                 | 4.71E-03 | gene_enhancer_links_neurosph_enhcenter | 6.14E-03 |
| H2AFZ_observed_Brain                   | 5.17E-03 | gpcr_union                             | 3.52E-03 |
| H3k27ac                                | 4.88E-03 | H2AFZ_imputed_Brain                    | 4.46E-03 |
| H3K27ac_imputed_Brain                  | 4.59E-03 | H2AFZ_imputed_Neurosph                 | 5.95E-03 |
| H3K27ac_imputed_Neurosph               | 5.14E-03 | H2AFZ_observed_Brain                   | 5.61E-03 |
| H3K27ac_observed_Brain                 | 4.54E-03 | H3k27ac                                | 5.37E-03 |
| H3K27ac_observed_Neurosph              | 5.79E-03 | H3K27ac_imputed_Brain                  | 6.32E-03 |
| H3K27me3_imputed_Brain                 | 5.02E-03 | H3K27ac_imputed_Neurosph               | 6.64E-03 |
| H3K27me3_imputed_Neurosph              | 6.51E-03 | H3K27ac_observed_Brain                 | 4.71E-03 |
| H3K27me3_observed_Brain                | 6.65E-03 | H3K27ac_observed_Neurosph              | 6.18E-03 |
| H3k4me1                                | 6.11E-03 | H3K27me3_imputed_Brain                 | 5.09E-03 |
| H3K4me1_imputed_Brain                  | 4.14E-03 | H3K27me3_imputed_Neurosph              | 6.37E-03 |
| H3K4me1_imputed_Neurosph               | 5.30E-03 | H3K27me3_observed_Brain                | 7.70E-03 |
| H3K4me1_observed_Brain                 | 5.63E-03 | H3k4me1                                | 7.23E-03 |
| H3K4me1_observed_Neurosph              | 4.32E-03 | H3K4me1_imputed_Brain                  | 5.71E-03 |
| H3K4me2_observed_Brain                 | 5.20E-03 | H3K4me1_imputed_Neurosph               | 6.01E-03 |
| H3k4me3                                | 7.73E-03 | H3K4me1_observed_Brain                 | 5.83E-03 |
| H3K4me3_imputed_Brain                  | 6.09E-03 | H3K4me1_observed_Neurosph              | 5.33E-03 |
| H3K4me3_imputed_Neurosph               | 5.11E-03 | H3K4me2_observed_Brain                 | 5.29E-03 |
| H3K4me3_observed_Brain                 | 5.38E-03 | H3k4me3                                | 5.32E-03 |
| H3K4me3_observed_Neurosph              | 5.40E-03 | H3K4me3_imputed_Brain                  | 5.26E-03 |

|                           |          |                           |          |
|---------------------------|----------|---------------------------|----------|
| H3K9ac_imputed_Brain      | 5.52E-03 | H3K4me3_imputed_Neurosph  | 4.10E-03 |
| H3K9ac_imputed_Neurosph   | 5.54E-03 | H3K4me3_observed_Brain    | 6.84E-03 |
| H3K9me3_imputed_Brain     | 5.66E-03 | H3K4me3_observed_Neurosph | 6.45E-03 |
| H3K9me3_imputed_Neurosph  | 5.85E-03 | H3K9ac_imputed_Brain      | 4.98E-03 |
| H3K9me3_observed_Brain    | 5.53E-03 | H3K9ac_imputed_Neurosph   | 6.92E-03 |
| H3K9me3_observed_Neurosph | 4.70E-03 | H3K9me3_imputed_Brain     | 6.78E-03 |
| H4K20me1_imputed_Neurosph | 4.40E-03 | H3K9me3_imputed_Neurosph  | 6.60E-03 |
| H4K20me1_observed_Brain   | 5.01E-03 | H3K9me3_observed_Brain    | 6.58E-03 |
| hacer_T1                  | 5.06E-03 | H3K9me3_observed_Neurosph | 7.87E-03 |
| HAR                       | 4.44E-03 | H4K20me1_imputed_Neurosph | 5.54E-03 |
| HetDomain                 | 1.13E-02 | H4K20me1_observed_Brain   | 5.35E-03 |
| HP_0000707                | 3.42E-03 | hacer_T1                  | 6.26E-03 |
| HP_0000708                | 4.66E-03 | HAR                       | 5.29E-03 |
| HP_0000717                | 9.17E-03 | HetDomain                 | 6.86E-03 |
| HP_0000729                | 3.13E-03 | HP_0000707                | 4.05E-03 |
| HP_0000752                | 3.17E-03 | HP_0000708                | 4.61E-03 |
| HP_0001197                | 4.68E-03 | HP_0000717                | 4.45E-03 |
| HP_0001250                | 3.83E-03 | HP_0000729                | 5.33E-03 |
| HP_0001507                | 4.22E-03 | HP_0000752                | 5.64E-03 |
| HP_0002011                | 5.61E-03 | HP_0001197                | 4.52E-03 |
| HP_0002715                | 7.74E-03 | HP_0001250                | 2.60E-03 |
| HP_0002960                | 9.04E-03 | HP_0001507                | 5.80E-03 |
| HP_0011446                | 5.33E-03 | HP_0002011                | 4.32E-03 |
| HP_0012443                | 6.80E-03 | HP_0002715                | 4.48E-03 |
| HP_0012638                | 3.39E-03 | HP_0002960                | 3.96E-03 |

|                                |          |                                |          |
|--------------------------------|----------|--------------------------------|----------|
| HP_0012639                     | 5.11E-03 | HP_0011446                     | 6.29E-03 |
| HP_0012759                     | 7.35E-03 | HP_0012443                     | 2.78E-03 |
| HP_0025031                     | 4.49E-03 | HP_0012638                     | 4.53E-03 |
| HP_0031466                     | 5.46E-03 | HP_0012639                     | 2.91E-03 |
| HP_0100022                     | 6.53E-03 | HP_0012759                     | 5.83E-03 |
| HP_0100753                     | 0        | HP_0025031                     | 7.89E-03 |
| HP_0100852                     | 4.28E-03 | HP_0031466                     | 5.76E-03 |
| liu_csbj_targetgene            | 5.18E-03 | HP_0100022                     | 3.54E-03 |
| loss_of_function_score1        | 5.91E-03 | HP_0100753                     | 4.64E-03 |
| loss_of_function_score2        | 3.25E-03 | HP_0100852                     | 5.19E-03 |
| loss_of_function_score3        | 5.53E-03 | liu_csbj_targetgene            | 4.99E-03 |
| methMCRF                       | 6.51E-03 | methMCRF                       | 7.48E-03 |
| mgc_essential_gene             | 4.35E-03 | mgc_essential_gene             | 1.39E-02 |
| miRNA                          | 4.85E-03 | miRNA                          | 5.29E-03 |
| non-codingRNAs                 | 5.81E-03 | non-codingRNAs                 | 4.88E-03 |
| nonEssential_in_culture_CRISPR | 4.74E-03 | nonEssential_in_culture_CRISPR | 4.26E-03 |
| nott_Astrocyte_enhancers       | 3.95E-03 | nott_Astrocyte_enhancers       | 5.09E-03 |
| nott_Astrocyte_promoters       | 4.51E-03 | nott_Astrocyte_promoters       | 6.32E-03 |
| nott_H3K4me3_around_TSS        | 6.04E-03 | nott_H3K4me3_around_TSS        | 5.61E-03 |
| nott_Microglia_enhancers       | 4.68E-03 | nott_Microglia_enhancers       | 5.14E-03 |
| nott_Microglia_promoters       | 5.68E-03 | nott_Microglia_promoters       | 5.16E-03 |
| nott_Neuronal_enhancers        | 1.23E-02 | nott_Neuronal_enhancers        | 1.09E-02 |
| nott_Neuronal_promoters        | 4.69E-03 | nott_Neuronal_promoters        | 5.36E-03 |
| nott_Oligo_enhancers           | 4.86E-03 | nott_Oligo_enhancers           | 5.79E-03 |
| nott_Oligo_promoters           | 6.11E-03 | nott_Oligo_promoters           | 4.81E-03 |

|                               |          |                               |          |
|-------------------------------|----------|-------------------------------|----------|
| nott_superEnhancer            | 0        | nott_superEnhancer            | 0        |
| Olfactory_receptors_mainland  | 6.80E-03 | Olfactory_receptors_mainland  | 2.50E-03 |
| phastCons46way                | 6.22E-03 | phastCons46way                | 6.99E-03 |
| phyloP46way                   | 5.13E-03 | phyloP46way                   | 5.65E-03 |
| POLR2A_imputed_Neurosph       | 6.71E-03 | POLR2A_imputed_Neurosph       | 4.29E-03 |
| PsychENCODE_CBC_H3K27ac       | 6.66E-03 | PsychENCODE_CBC_H3K27ac       | 4.85E-03 |
| PsychENCODE_HiC_EP            | 4.96E-03 | PsychENCODE_HiC_EP            | 4.61E-03 |
| PsychENCODE_loops_interRegion | 4.33E-03 | PsychENCODE_loops_interRegion | 4.30E-03 |
| PsychENCODE_PEC_Enhancers     | 1.04E-02 | PsychENCODE_PEC_Enhancers     | 7.93E-03 |
| PsychENCODE_PFC_H3K27ac       | 6.18E-03 | PsychENCODE_PFC_H3K27ac       | 4.74E-03 |
| PsychENCODE_TAR               | 5.81E-03 | PsychENCODE_TAR               | 5.18E-03 |
| PsychENCODE_TC_H3K27ac        | 4.70E-03 | PsychENCODE_TC_H3K27ac        | 4.70E-03 |
| RAD21_imputed_Brain           | 5.53E-03 | RAD21_imputed_Brain           | 6.13E-03 |
| RAD21_imputed_Neurosph        | 5.69E-03 | RAD21_imputed_Neurosph        | 6.04E-03 |
| RoadmapDNasePromCount         | 4.78E-03 | RoadmapDNasePromCount         | 4.88E-03 |
| SE_ele                        | 4.32E-03 | SE_ele                        | 5.16E-03 |
| SEA00101                      | 4.63E-03 | SEA00101                      | 5.57E-03 |
| sfari_gene                    | 4.56E-03 | sfari_gene                    | 4.32E-03 |
| SMC3_imputed_Brain            | 6.01E-03 | SMC3_imputed_Brain            | 5.35E-03 |
| SMC3_imputed_Neurosph         | 4.65E-03 | SMC3_imputed_Neurosph         | 6.88E-03 |
| snp_selex                     | 8.40E-03 | snp_selex                     | 4.48E-03 |
| TAD56                         | 7.91E-03 | TAD56                         | 7.23E-03 |
| tss2000bp                     | 1.78E-02 | tss2000bp                     | 1.46E-02 |
| vista                         | 4.74E-03 | vista                         | 4.54E-03 |
| yue_loops_hippo               | 5.13E-03 | yue_loops_hippo               | 6.64E-03 |

## References

1. Hart T, Tong AHY, Chan K, et al. Evaluation and Design of Genome-Wide CRISPR/SpCas9 Knockout Screens. *G3 (Bethesda)* 2017;7:2719-27. doi: 10.1534/g3.117.041277
2. Karczewski KJ, Francioli LC, Tiao G, et al. The mutational constraint spectrum quantified from variation in 141,456 humans. *Nature* 2020;581:434-43. doi: 10.1038/s41586-020-2308-7
3. Strande NT, Riggs ER, Buchanan AH, et al. Evaluating the Clinical Validity of Gene-Disease Associations: An Evidence-Based Framework Developed by the Clinical Genome Resource. *Am J Hum Genet* 2017;100:895-906. doi: 10.1016/j.ajhg.2017.04.015
4. Wright CF, Fitzgerald TW, Jones WD, et al. Genetic diagnosis of developmental disorders in the DDD study: a scalable analysis of genome-wide research data. *Lancet* 2015;385:1305-14. doi: 10.1016/S0140-6736(14)61705-0
5. Collins RL, Glessner JT, Porcu E, et al. A cross-disorder dosage sensitivity map of the human genome. *Cell* 2022;185:3041-3055.e25. doi: 10.1101/2021.01.26.21250098
6. Wishart DS, Feunang YD, Guo AC, et al. DrugBank 5.0: a major update to the DrugBank database for 2018. *Nucleic Acids Res* 2018;46:D1074-D82. doi: 10.1093/nar/gkx1037
7. Motenko H, Neuhauser SB, O'Keefe M, et al. MouseMine: a new data warehouse for MGI. *Mamm Genome* 2015;26:325-30. doi: 10.1007/s00335-015-9573-z
8. Kohler S, Gargano M, Matentzoglou N, et al. The Human Phenotype Ontology in 2021. *Nucleic Acids Res* 2021;49:D1207-D17. doi: 10.1093/nar/gkaa1043
9. Braschi B, Denny P, Gray K, et al. Genenames.org: the HGNC and VGNC resources in 2019. *Nucleic Acids Res* 2019;47:D786-D92. doi: 10.1093/nar/gky930
10. Abrahams BS, Arking DE, Campbell DB, et al. SFARI Gene 2.0: a community-driven knowledgebase for the autism spectrum disorders (ASDs). *Mol Autism* 2013;4:36. doi: 10.1186/2040-2392-4-36
11. Ernst J, Kellis M. ChromHMM: automating chromatin-state discovery and characterization. *Nat Methods* 2012;9:215-6. doi: 10.1038/nmeth.1906
12. Boix CA, James BT, Park YP, et al. Regulatory genomic circuitry of human disease loci by integrative epigenomics. *Nature* 2021;590:300-07. doi: 10.1038/s41586-020-03145-z
13. Sabo PJ, Hawrylycz M, Wallace JC, et al. Discovery of functional noncoding elements by digital analysis of chromatin structure. *Proc Natl Acad Sci U.S.A.* 2004;101:16837-42. doi: 10.1073/pnas.0407387101
14. Davis CA, Hitz BC, Sloan CA, et al. The Encyclopedia of DNA elements (ENCODE): data portal update. *Nucleic Acids Res* 2018;46:D794-D801. doi: 10.1093/nar/gkx1081

15. Roadmap Epigenomics C, Kundaje A, Meuleman W, et al. Integrative analysis of 111 reference human epigenomes. *Nature* 2015;518:317-30. doi: 10.1038/nature14248
16. Nott A, Holtman IR, Coufal NG, et al. Brain cell type-specific enhancer-promoter interactome maps and disease-risk association. *Science* 2019;366:1134-39. doi: 10.1126/science.aay0793
17. Khan A, Zhang X. dbSUPER: a database of super-enhancers in mouse and human genome. *Nucleic Acids Res* 2016;44:D164-71. doi: 10.1093/nar/gkv1002
18. Gao T, Qian J. EnhancerAtlas 2.0: an updated resource with enhancer annotation in 586 tissue/cell types across nine species. *Nucleic Acids Res* 2020;48:D58-D64. doi: 10.1093/nar/gkz980
19. Andersson R, Gebhard C, Miguel-Escalada I, et al. An atlas of active enhancers across human cell types and tissues. *Nature* 2014;507:455-61. doi: 10.1038/nature12787
20. Wang J, Dai X, Berry LD, et al. HACER: an atlas of human active enhancers to interpret regulatory variants. *Nucleic Acids Res* 2019;47:D106-D12. doi: 10.1093/nar/gky864
21. Wang D, Liu S, Warrell J, et al. Comprehensive functional genomic resource and integrative model for the human brain. *Science* 2018;362:eaat8464. doi: 10.1126/science.aat8464
22. Jiang Y, Qian F, Bai X, et al. SEdb: a comprehensive human super-enhancer database. *Nucleic Acids Res* 2019;47:D235-D43. doi: 10.1093/nar/gky1025
23. Chen C, Zhou D, Gu Y, et al. SEA version 3.0: a comprehensive extension and update of the Super-Enhancer archive. *Nucleic Acids Res* 2020;48:D198-D203. doi: 10.1093/nar/gkz1028
24. Visel A, Minovitsky S, Dubchak I, et al. VISTA Enhancer Browser--a database of tissue-specific human enhancers. *Nucleic Acids Res* 2007;35:D88-92. doi: 10.1093/nar/gkl822
25. Harrow J, Frankish A, Gonzalez JM, et al. GENCODE: the reference human genome annotation for The ENCODE Project. *Genome Res* 2012;22:1760-74. doi: 10.1101/gr.135350.111
26. Liu X, Xu W, Leng F, et al. Prioritizing long range interactions in noncoding regions using GWAS and deletions perturbed TADs. *Comput Struct Biotechnol J* 2020;18:2945-52. doi: 10.1016/j.csbj.2020.10.014
27. Wang Y, Song F, Zhang B, et al. The 3D Genome Browser: a web-based browser for visualizing 3D genome organization and long-range chromatin interactions. *Genome Biol* 2018;19:151. doi: 10.1186/s13059-018-1519-9
28. Yan J, Qiu Y, Ribeiro Dos Santos AM, et al. Systematic analysis of binding of transcription factors to noncoding variants. *Nature* 2021;591:147-51. doi: 10.1038/s41586-021-03211-0



- 1  
2  
3  
4  
5 29. Karolchik D, Hinrichs AS, Furey TS, et al. The UCSC Table Browser data retrieval tool. *Nucleic Acids Res* 2004;32:D493-6. doi: 10.1093/nar/gkh103  
6 30. Ho JW, Jung YL, Liu T, et al. Comparative analysis of metazoan chromatin organization. *Nature* 2014;512:449-52. doi: 10.1038/nature13415  
7 31. Doan RN, Bae BI, Cubelos B, et al. Mutations in Human Accelerated Regions Disrupt Cognition and Social Behavior. *Cell* 2016;167:341-54 e12. doi:  
8 10.1016/j.cell.2016.08.071  
9 32. Harding SD, Sharman JL, Faccenda E, et al. The IUPHAR/BPS Guide to PHARMACOLOGY in 2018: updates and expansion to encompass the new guide to  
10 IMMUNOPHARMACOLOGY. *Nucleic Acids Res* 2018;46:D1091-D106. doi: 10.1093/nar/gkx1121  
11 33. Alexander SP, Christopoulos A, Davenport AP, et al. THE CONCISE GUIDE TO PHARMACOLOGY 2017/18: G protein-coupled receptors. *Br J Pharmacol*  
12 2017;174 Suppl 1:S17-S129. doi: 10.1111/bph.13878  
13 34. Collins RL, Glessner JT, Porcu E, et al. A cross-disorder dosage sensitivity map of the human genome. *Cell* 2022;185:3041-55.e25. doi: 10.1016/j.cell.2022.06.036  
14 35. UniProt Consortium T. UniProt: the universal protein knowledgebase. *Nucleic Acids Res* 2018;46:2699. doi: 10.1093/nar/gky092  
15 36. Howe KL, Achuthan P, Allen J, et al. Ensembl 2021. *Nucleic Acids Res* 2021;49:D884-D91. doi: 10.1093/nar/gkaa942  
16  
17  
18  
19  
20  
21  
22  
23  
24  
25  
26  
27  
28  
29  
30  
31  
32  
33  
34  
35  
36  
37  
38  
39  
40  
41  
42  
43  
44  
45  
46

# BMJ Paediatrics Open

## NeuroCNVscore: A tissue-specific framework to prioritize the pathogenicity of CNVs in neurodevelopmental disorders

|                               |                                                                                                                                                                                                                                                                                                                                                                                                                                                           |
|-------------------------------|-----------------------------------------------------------------------------------------------------------------------------------------------------------------------------------------------------------------------------------------------------------------------------------------------------------------------------------------------------------------------------------------------------------------------------------------------------------|
| Journal:                      | <i>BMJ Paediatrics Open</i>                                                                                                                                                                                                                                                                                                                                                                                                                               |
| Manuscript ID                 | bmjpo-2023-001966.R1                                                                                                                                                                                                                                                                                                                                                                                                                                      |
| Article Type:                 | Original research                                                                                                                                                                                                                                                                                                                                                                                                                                         |
| Date Submitted by the Author: | 05-Jun-2023                                                                                                                                                                                                                                                                                                                                                                                                                                               |
| Complete List of Authors:     | Liu, Xuanshi; Beijing Children's Hospital<br>Xu, Wenjian; Beijing Children's Hospital, Biology<br>Leng, Fei; Beijing Children's Hospital<br>Zhang, Peng; Beijing Children's Hospital<br>Guo, Ruolan; Beijing Children's Hospital<br>Zhang, Yue; Beijing Children's Hospital<br>Hao, Chanjuan; Beijing Children's Hospital<br>Ni, Xin; Beijing Children's Hospital, Department of Otolaryngology, Head and Surgery<br>Li, Wei; Beijing Children's Hospital |
| Keywords:                     | Genetics, Neurology                                                                                                                                                                                                                                                                                                                                                                                                                                       |
|                               |                                                                                                                                                                                                                                                                                                                                                                                                                                                           |

SCHOLARONE™  
Manuscripts



I, the Submitting Author has the right to grant and does grant on behalf of all authors of the Work (as defined in the below author licence), an exclusive licence and/or a non-exclusive licence for contributions from authors who are: i) UK Crown employees; ii) where BMJ has agreed a CC-BY licence shall apply, and/or iii) in accordance with the terms applicable for US Federal Government officers or employees acting as part of their official duties; on a worldwide, perpetual, irrevocable, royalty-free basis to BMJ Publishing Group Ltd ("BMJ") its licensees and where the relevant Journal is co-owned by BMJ to the co-owners of the Journal, to publish the Work in this journal and any other BMJ products and to exploit all rights, as set out in our [licence](#).

The Submitting Author accepts and understands that any supply made under these terms is made by BMJ to the Submitting Author unless you are acting as an employee on behalf of your employer or a postgraduate student of an affiliated institution which is paying any applicable article publishing charge ("APC") for Open Access articles. Where the Submitting Author wishes to make the Work available on an Open Access basis (and intends to pay the relevant APC), the terms of reuse of such Open Access shall be governed by a Creative Commons licence – details of these licences and which [Creative Commons](#) licence will apply to this Work are set out in our licence referred to above.

Other than as permitted in any relevant BMJ Author's Self Archiving Policies, I confirm this Work has not been accepted for publication elsewhere, is not being considered for publication elsewhere and does not duplicate material already published. I confirm all authors consent to publication of this Work and authorise the granting of this licence.

1  
2  
3  
4 **Title: NeuroCNVscore: A Tissue-Specific Framework to Prioritize the**  
5  
6 **Pathogenicity of CNVs in Neurodevelopmental Disorders**  
7  
8

9 **Short title:** Prioritizing the pathogenicity of CNVs  
10

11 **Authors:** Xuanshi Liu<sup>1</sup>, Wenjian Xu<sup>1</sup>, Fei Leng<sup>1</sup>, Peng Zhang<sup>1</sup>, Ruolan Guo<sup>1</sup>, Yue  
12  
13 Zhang<sup>1</sup>, Chanjuan Hao<sup>1\*</sup>, Xin Ni<sup>2\*</sup>, Wei Li<sup>1\*</sup>  
14  
15  
16

17 **Affiliations:**  
18

19  
20 <sup>1</sup>*Beijing Key Laboratory for Genetics of Birth Defects, Beijing Paediatric Research*  
21  
22 *Institute; MOE Key Laboratory of Major Diseases in Children; Genetics and Birth*  
23  
24 *Defects Control Centre, Beijing Children's Hospital, Capital Medical University,*  
25  
26 *National Centre for Children's Health, Beijing, China;*  
27  
28  
29

30  
31 <sup>2</sup>*Department of Otolaryngology, Head and Surgery, Beijing Children's Hospital,*  
32  
33 *Capital Medical University, National Centre for Children's Health, Beijing, China.*  
34  
35

36 **\* Corresponding authors.** Emails: liwei@bch.com.cn (Li W.), nixin@bch.com.cn (Ni  
37  
38 X.), hchjhchj@163.com (Hao C.).  
39  
40  
41

42  
43 **Word Count:** 2360 words through Introduction to Discussion.  
44  
45

46 **Fundings:** This work was partially supported by the Ministry of Science and  
47  
48 Technology of China (2019YFA0802104; 2016YFC1000306); the National Natural  
49  
50 Science Foundation of China (31830054); the Beijing Natural Science Foundation  
51  
52 (5222007); and the Beijing Municipal Health Commission (JingYiYan 2018-5).  
53  
54  
55  
56  
57  
58  
59  
60

## Abstract

**Background:** Neurodevelopmental disorders (NDDs) are associated with altered development of the brain especially in childhood. Copy number variants (CNVs) play a crucial role in the genetic aetiology of NDDs by disturbing gene expression directly at linear sequence or remotely at three-dimensional genome level in a tissue-specific manner. Despite the substantial increase in NDD studies employing whole-genome sequencing, there is no specific tool for prioritizing the pathogenicity of CNVs in the context of NDDs. **Methods:** Using an XGBoost classifier, we integrated 189 features that represent genomic sequences, gene information, and functional/genomic segments for evaluating genome-wide CNVs in a neuro/brain-specific manner, to develop a new tool, neuroCNVscore. We utilized Human Phenotype Ontology to construct an independent NDD-related set. **Results:** Our neuroCNVscore framework (<https://github.com/lxsbcn/neuroCNVscore>) achieved high predictive performance (PR = 0.82; AUC = 0.85) and outperformed an existing reference method SVScore. Notably, the predicted pathogenic CNVs showed enrichment in known genes associated with autism. **Conclusions:** NeuroCNVscore prioritizes functional, deleterious and pathogenic CNVs in NDDs at whole genome-wide level, which is important for genetic studies and clinical genomic screening of NDDs as well as for providing novel biological insights into NDDs.

**Key Words:** Neurodevelopmental disorder; Copy number variant; Pathogenicity; Tissue specificity; Gene expression

**Key Messages:****• What is already known on this topic**

CNVs are important in the genetic aetiology of NDDs. Systematic identification of CNV pathogenicity by virtue of their size, number and impact on genome is challenge. Several tools are available to evaluate CNVs or structural variants, but none on CNVs specific for NDDs.

**• What this study adds**

NeuroCNVscore is a useful tool in prioritizing functional and/or pathogenic CNVs in NDDs at whole genome-wide level in a neuro/brain-specific manner.

**• How this study might affect research, practice or policy**

Given the expanding studies on NDDs and the usage of sequencing in clinical practice, our neuroCNVscore speeds up the screening on pathogenic CNVs, which facilitates the clinical diagnoses of CNVs with unknown significant, and thus may provide novel biological insights into NDDs.

## Introduction

Neurodevelopmental disorders (NDDs) are characterized by the inability to achieve cognitive, emotional, and motor developmental milestones including autism spectrum disorder (ASD), attention deficit hyperactivity disorder (ADHD) and schizophrenia. It is estimated to affect over 11.3%, and 15% of the population in low and middle-income countries (1) and US, (2) respectively. NDD's heritability is high that has been estimated from twin and family studies as 50% to 90% in ASD, (3) 88% in ADHD (4) and 85% in schizophrenia. (5) Genomic alterations are commonly found in children with NDDs. However, the explained genetic aetiology of NDDs accounts for only a small proportion.

Copy number variants (CNVs) are structural variants (SVs) in the genome that involve the gain or loss of large segments of DNA, which have been implicated in NDDs. (6,7) Systematic identification of CNV pathogenicity by virtue of their number, size and impact on the genome is still a challenge. It is approximately 1,000 CNVs per genome ranging in size from 50 base pairs (bp) to several mega bases (Mb). CNVs make effects by altering the dosage of gene regions (8) as well as by perturbing non-coding areas. (7,9) Growing number of studies by whole genome sequencing (WGS) and the complexity of identifying pathogenic CNVs call for computational prediction tools.

1  
2  
3  
4 Many assessing tools have been developed to evaluate the pathogenicity of single  
5  
6 nucleotide variants (SNVs), (10,11) but fewer studies have systematically focused on  
7  
8 assessing the pathogenic CNVs, especially none in NDD-related CNVs. Recently,  
9  
10 SVScore, (12) SVFX, (13) SVPath, (14) and AnnotSV (15) have been developed to  
11  
12 interpret the SVs by integrating results from prediction matrices of SNPs, using cancer  
13  
14 related SVs as inputs, counting SVs with overlapped exons, or integrating multiple  
15  
16 sources to annotate SVs. However, the aggregated effects on SNPs, somatic impacts of  
17  
18 SVs, or only overlapping exons without tissue-specific information may bias the effects  
19  
20 of CNVs. As germline variations are the major focus in NDDs, a specific tool is needed  
21  
22 for assessing the effects of CNVs on NDDs.  
23  
24  
25  
26  
27  
28  
29

30  
31 We here present a novel supervised machine learning framework, named as  
32  
33 neuroCNVScore (<https://github.com/lxsbch/neuroCNVscore>), to score the  
34  
35 pathogenicity of CNVs related to NDDs. We hypothesize that the computational  
36  
37 prediction on pathogenic CNVs would benefit from a set of comprehensive tissue-  
38  
39 specific features covering the whole genomic regions. Hence, we employed germline  
40  
41 CNVs obtained from published NDD studies, (16-19) and curated gene lists together  
42  
43 with a comprehensive set of neuro/brain-specific data on non-coding regions from  
44  
45 ENCODE, (20) Roadmap, (21) EpiMap (22) and PsychENCODE (23) to train our  
46  
47 models. Moreover, we constructed an independent dataset associated with NDDs by  
48  
49 filtering the phenotypes from Human Phenotype Ontology (HPO, <https://hpo.jax.org/>)  
50  
51 to evaluate the performance of our trained models. The performance of  
52  
53  
54  
55  
56  
57  
58  
59  
60



1  
2  
3  
4 neuroCNVScore was compared with a reference method SVScore. (12) This  
5  
6 neuroCNVScore is designed for assessing the pathogenicity of CNVs in NDDs  
7  
8  
9 generated from association studies or genetic tests.  
10

## 11 12 13 14 15 **Methods**

### 16 17 18 19 20 **Data collection and pre-processing/harmonization**

21  
22 We developed neuroCNVscore, which utilized XGBoost and comprehensive genome-  
23  
24 wide features to evaluate the likelihood that a given CNV contributes to the  
25  
26 development or manifestation of NDDs. To assess the pathogenicity associated with  
27  
28 CNV in NDDs, we gathered training set (identified by genomic coordinates) from  
29  
30 several case-control NDD studies. We assigned CNVs from cases as likely pathogenic  
31  
32 (LP). In contrast, the CNVs from unaffected individuals and parents served as the  
33  
34 control. Together, we collected 86,694 CNVs in the LP set and 786,058 in the control  
35  
36 set from four data sources, respectively (**Fig. 1**).  
37  
38  
39  
40  
41  
42  
43

44  
45 Initial data filtering and harmonization were performed on all autosomal  
46  
47 chromosome CNVs in three major steps. Firstly, we excluded CNVs with a size smaller  
48  
49 than 50 base pairs, and the remaining CNVs were categorized into two groups based on  
50  
51 their impact on the genome: copy number loss and copy number gain. Next, we deleted  
52  
53 CNVs which had 90% reciprocal overlap between LP and control. Finally, we applied  
54  
55 an empirical cumulative distribution function with bin size of 60 to generate size  
56  
57  
58  
59  
60

1  
2  
3  
4 matched LP and control to overcome the amount of disparity between groups. For each  
5  
6 CNV type, we sampled an equal number of LP CNVs ensuring the matching of control  
7  
8 CNVs in each bin. For training process, we retained 13,857 cleaned LP CNVs and  
9  
10  
11  
12 13,859 cleaned control CNVs.

13  
14  
15 Next, we constructed an independent test set by assembling 51,819 disease  
16  
17 associated variations from ClinVar database (<https://www.ncbi.nlm.nih.gov/clinvar/>)  
18  
19 and 136,181 common CNVs from GnomAD 2.1 (<http://www.gnomad-sg.org/>). For the  
20  
21 NDD related set, we retained CNVs with length > 50 bp, germline, pathogenic, and the  
22  
23 term of HPO: 0012759 (neurodevelopmental abnormality associated genes). For  
24  
25 common CNVs, we kept CNVs with quality record PASS, and allele frequency > 0.1.  
26  
27 To avoid over-estimation, we removed those CNVs with 90% reciprocal overlap within  
28  
29 the training dataset under the same variant type.  
30  
31  
32  
33  
34  
35

36  
37 Finally, we collected several NDD related gene lists to evaluate the biological  
38  
39 validity and robustness of neuroCNVscore including CHD8 target genes, (24) human  
40  
41 postsynaptic density (PSD) proteins (25) and ASD risk genes (FDR < 0.3). (18) The  
42  
43 overall workflow is outlined in **Fig. 1**.  
44  
45  
46  
47  
48  
49

### 50 **A comprehensive tissue-specific feature collection and feature matrix construction**

51  
52 For each CNV, a broad range of features was compiled into a feature matrix. We  
53  
54 leveraged 189 features in total from three different levels: (1) gene level (Gen), (2)  
55  
56  
57  
58  
59  
60

1  
2  
3  
4 functional/genomic segment level (Fun), and (3) sequence level (Seq). The description  
5  
6 of features is shown in **Table S1**.  
7

8  
9 In brief, a set of gene level features (N = 62) that contain gene entity, dosage  
10 sensitivity and neurodevelopmental phenotype were collected. Since non-coding CNVs  
11  
12 may disrupt regulatory regions to compromise gene expression and translation in a  
13  
14 linear or 3D manner, we obtained a regulatory cascade catalogue (N = 120 at  
15  
16 functional/genomic segment level). This catalogue integrated multi-omics data  
17  
18 encompassing experimentally identified or computational predicted regulatory regions  
19  
20 with a focus on tissue-specific annotation. Finally, the sequence level features (N = 7)  
21  
22 comprised of information of GC content, cross species conservation score  
23  
24 (phyloP46way and phastcon46way which are derived from phyloP or Hidden Markov  
25  
26 Model via multiple alignment of 45 vertebrate genomes to the human genome),  
27  
28 heterochromatin positions, collapsed repeat regions (DacMapExclude,  
29  
30 DukeMapExclude are genomic regions calculated by different algorithms) retrieved  
31  
32 from the UCSC genome browser (<http://genome.ucsc.edu/>), and human accelerated  
33  
34 regions accessed by Doan *et al.*. (26) These features were instrumental in identifying  
35  
36 functional genomic regions and/or filtering out the genomic regions which may cause  
37  
38 artefacts from downstream segments.  
39  
40  
41  
42  
43  
44  
45  
46  
47  
48  
49  
50  
51

52  
53 Based on a variety of features, annotations were performed in three distinct ways:  
54  
55 (1) counting the number of overlapped features with a given CNV, (2) assessing a  
56  
57 discrete value that denotes the number of the features which has >50% reciprocal  
58  
59  
60

1  
2  
3  
4 overlapped regions with a given CNV, (3) calculating the average value of overlapped  
5  
6 regions between the feature and a given CNV. After initial annotation, we divided the  
7  
8 entire feature matrix based on the length of each CNV and then applied min-max  
9  
10 scaling. Considering the differences in features, e.g. triplosensitivity is a measurement  
11  
12 only for the copy number gain, we kept 172 features out of 189 for the copy number  
13  
14 loss model and 172 features out of 189 in the copy number gain model, respectively.  
15  
16  
17  
18  
19  
20  
21  
22

### 23 **Design of XGBoost model and the training strategy**

24  
25 To choose an appropriate model, we compared the performances among different  
26  
27 algorithms (Naïve Bayes, Logistic Regression, Support Vector Machine, and  
28  
29 XGBoost), and we found that XGBoost had the best performance in the python  
30  
31 framework from Scikit 0.22.1 with the binary logistic objective function. A total of  
32  
33 80%/20% of the variant sets was used as training/test sets, respectively. Next, we  
34  
35 trained the XGBoost model with optimized parameters by using grid search and  
36  
37 evaluated our models through an independent test set. Additionally, we assessed the  
38  
39 performance by comparing our model with SVScore, which can evaluate various types  
40  
41 of SV including CNV.  
42  
43  
44  
45  
46  
47  
48  
49  
50  
51  
52

### 53 **Statistics**

54  
55 Statistical analyses were performed using Python (version 2.7). The performance was  
56  
57 measured by precision-recall (PR) and receiver operating characteristic (ROC) curves.  
58  
59  
60

1  
2  
3  
4 For individual feature comparison, we applied two-tailed Wilcoxon rank-sum tests. All  
5  
6 genomic data is in GRCh37 genome build. Figures were generated by the ggplot  
7  
8 package in R (version 3.6.1) or matplotlib in Python.  
9  
10

### 11 12 13 14 15 **Patient and public involvement**

16  
17 Patients or the public were not involved in the design, or conduct, or reporting, or  
18  
19 dissemination plans of our research. No ethical issues are involved in this study as this  
20  
21 paper only used the data deposited in the public accessible databases.  
22  
23  
24  
25

### 26 27 28 **Results**

#### 29 30 31 32 33 **Feature analyses pinpoint comprehensive feature sets**

34  
35 To understand the characteristics of CNVs in NDDs, we investigated the distribution  
36  
37 of features between LP and control sets. In total, we observed 121 and 106 significant  
38  
39 features at the threshold of  $P = 0.05$  in copy number loss and copy number gain models,  
40  
41 respectively (**Table S2**). These findings demonstrated that a large spectrum of features  
42  
43 have significant differences between sets.  
44  
45  
46  
47  
48

49  
50 Among these significant features, functional/genomic segment features ranked  
51  
52 higher than the others. Most of the highly ranked features were related to histone  
53  
54 modification markers (e.g. H3K27me3, H3K27ac) and 3D chromatin related features  
55  
56 (e.g. enhancers) (**Fig. 2**). This is as expected since noncoding regions account for 98%  
57  
58  
59  
60

1  
2  
3  
4 of the human genome and CNVs can affect the gene function by interrupting the  
5  
6  
7 regulatory regions.  
8  
9

### 10 11 12 **Comparisons among four algorithms reveal the superior performance of XGBoost**

13  
14 To find an optimal model for identifying pathogenic CNVs, we evaluated the predictive  
15  
16 performance of Naïve Bayes, Logistic Regression, Support Vector Machine (SVM) and  
17  
18 XGBoost on the test sets (**Fig. 3**). The XGBoost model showed the highest performance  
19  
20 (average precision (AP) and area under curve (AUC) were 0.82, 0.85 for copy number  
21  
22 loss; AP and AUC were 0.80, 0.84 for copy number gain). Therefore, we applied the  
23  
24 XGBoost model to construct our neuroScoreCNV framework.  
25  
26  
27  
28  
29  
30  
31  
32  
33

### 34 **Accuracy assessments reveal better performance of neuroScoreCNV than** 35 36 **SVScore**

37  
38 We evaluated the performance of neuroScoreCNV and SVScore by an independent set  
39  
40 as described in the flowchart (**Fig. 1**). NeuroScoreCNV achieved relatively better  
41  
42 performance evaluated by both AP and AUC values compared to SVScore (**Fig. 4**). The  
43  
44 different performances between models are in agreement with a previous study. (13)  
45  
46  
47  
48  
49

50 Moreover, we investigated the biological validity and robustness from two aspects.  
51  
52 It was shown that interruptions at conserved regions could cause diseases since these  
53  
54 regions are normally functional. (27) Therefore, we first computed the CNV pathogenic  
55  
56 scores generated with the new feature matrices in which a conservation score (i.e.  
57  
58  
59  
60

1  
2  
3  
4 PhyloP46way, one of the commonly used conservation score that considering  
5  
6 individual base conservation) was excluded. We observed that higher CNV pathogenic  
7  
8 scores ( $\geq 0.7$ ) tended to have higher conservation scores, as indicated by the correlation  
9  
10 between  $\log_{10}(\text{PhyloP46way})$  and the new pathogenic scores (**Fig. 5A, B**). Then, we  
11  
12 checked if our predicted scores were capable of prioritizing CNVs with known NDD-  
13  
14 associated genes. LP CNVs covered significantly ( $P < 0.05$ ) more NDD-related genes  
15  
16 than the control group (**Fig. 5B**). Overall, our approach achieved higher performance  
17  
18 in discriminating LP CNVs from control or benign CNVs.  
19  
20  
21  
22  
23  
24  
25  
26  
27

### 28 **Feature importance highlights the important role of regulatory regions in NDDs**

29  
30 We categorized model features into three groups: functional/genomic level (Fun), gene  
31  
32 level (Gen) and sequence level (Seq) and computed the feature importance by  
33  
34 permutation. (**Fig. 6** **Figure 6**, **Table S3**). The most important features were genes with  
35  
36 haploinsufficiency scores (PHI) and triplosensitivity scores (PTS). PHI reflects the  
37  
38 probability of one single functional copy to be sufficient to maintain function, whereas  
39  
40 PTS suggests the probability of an additional copy of a gene for generating phenotypes.  
41  
42 PHI and PTS are important parameters for evaluating the pathogenicity in clinical  
43  
44 diagnoses based on the ACMG guidelines. (28) This is also true in neuroCNVScore. In  
45  
46 NDDs, several studies found pathogenic CNVs were sensitive to dosage. (29)  
47  
48  
49  
50  
51  
52  
53

54  
55 Additionally, we noticed several prominent phenotypes such as HPO: 000717  
56  
57 (autism associated genes), HPO: 0002960 (autoimmunity associated genes) and HPO:  
58  
59  
60

1  
2  
3  
4 0025031 (abnormality of the digestive system associated genes). It is known that  
5  
6 immune system abnormalities and/or gastrointestinal symptoms can co-occur with  
7  
8 ASD (30) and schizophrenia. (31) Compelling evidence has demonstrated the  
9  
10 importance of autoimmune response in ASD. (32) Purified IgG containing antibodies  
11  
12 from the mothers of children with ASD can cause abnormal behaviours in animal  
13  
14 models. (33,34)  
15  
16  
17  
18  
19

20 Among the important features at the functional/genomic segment level, we  
21  
22 observed several key players in 3D chromatin conformation including enhancers and  
23  
24 topologically associated domains (TADs). Meanwhile, DNase-Seq which suggests  
25  
26 active regulatory elements at open chromatin was also an important feature. The  
27  
28 emerging evidence has highlighted the role of 3D chromatin conformation in relation  
29  
30 to NDDs. (23, 35) Collectively, studying the interaction between CNVs and the higher  
31  
32 order of chromatin conformation could provide novel insights into the aetiology of  
33  
34 NDDs and explain the missing heredity of NDDs.  
35  
36  
37  
38  
39  
40  
41  
42  
43  
44

## 45 **Discussion**

46  
47  
48  
49  
50 In this study, we have introduced a novel framework, neuroCNVscore, to evaluate the  
51  
52 pathogenicity of CNVs in NDDs. NeuroCNVscore outperformed a commonly used tool  
53  
54 SVScore on independent datasets from ClinVar and gnomAD. Importantly,  
55  
56 neuroCNVscore has unique ability to prioritize the functional, deleterious and  
57  
58  
59  
60



1  
2  
3  
4 pathogenic CNVs derived from either NDD's association studies or clinical diagnoses,  
5  
6  
7 which may provide biological insights into NDDs, especially at the three-dimensional  
8  
9  
10 genome level.

11  
12 There are several factors contribute to the accuracy and robustness of  
13  
14 neuroCNVscore. First, we used a high-quality set of germline CNVs from published  
15  
16 NDD studies as the training set, ensuring the high reliability of this model. Secondly,  
17  
18 we validated our models by using an independent dataset associated with NDD, which  
19  
20  
21  
22  
23 outperformed a published tool, SVScore. Furthermore, we curated a comprehensive  
24  
25  
26 feature collection (N = 189) at gene, functional genomic, and sequence levels.  
27  
28 Specifically, we incorporated a significant amount of tissue-specific functional  
29  
30  
31  
32  
33  
34  
35  
36  
37  
38  
39  
40  
41  
42  
43  
44  
45  
46  
47  
48  
49  
50  
51  
52  
53  
54  
55  
56  
57  
58  
59  
60  
Specifically, we incorporated a significant amount of tissue-specific functional  
genomic data, enabling the identification of disrupted genes and regulatory elements  
that act in a tissue-specific manner during development. This is especially important  
for the studies in NDD since brain tissue is normally hard to access.

While the neuroCNVscore performed well, it may be improved by incorporating  
expert-curated CNVs from whole genome sequencing studies in NDDs and healthy  
controls. Along with the increased knowledge and functional genomics data on non-  
coding regions, additional informative features can be integrated into the model to  
better address the underlying mechanisms. Moreover, we developed neuroCNVscore  
based on XGBoost, but it is worth exploring deep learning algorithms in future  
investigation.

1  
2  
3  
4 In summary, our neuroCNVscore is a useful tool for generating hypotheses in  
5  
6 genome-wide association studies in NDDs and could facilitate the understanding of  
7  
8 genetic aetiology of NDDs.  
9  
10

### 11 12 13 14 15 **Competing Interests** 16

17  
18  
19  
20 The authors declare that they have no competing interests.  
21  
22

### 23 24 25 26 **Author Contributions** 27

28  
29  
30  
31 XL designed the study, performed the analysis and drafted the manuscript. WX and FL  
32  
33 participated in the design and interpretation of the data and revised the manuscript. PZ,  
34  
35 RG and YZ participated in the interpretation of data. CH coordinated the project and  
36  
37 supervised the study. XN coordinated the project and acquisition the funding. WL  
38  
39 coordinated the project, supervised the study, critically reviewed and revised the  
40  
41 manuscript. All authors read and approved the final manuscript.  
42  
43  
44  
45  
46  
47  
48  
49  
50

### 51 **Availability of Data and Materials** 52 53 54

55 All features analysed during this study are collected from public datasets. Sources can  
56  
57 be found from [https://github.com/macarthur-lab/gene\\_lists](https://github.com/macarthur-lab/gene_lists). All CNV training data are  
58  
59  
60

1  
2  
3  
4 included in these publications <sup>16-19</sup> and testing data are from the ClinVar database. The  
5  
6  
7 source code is available at <https://github.com/lxsbcn/neuroCNVscore>.  
8  
9  
10

## 11 12 **Ethics Statement**

13  
14  
15  
16  
17 This study has been approved by the Ethics Committee of Beijing Children's Hospital,  
18  
19  
20  
21  
22  
23  
24  
25  
26  
27  
28  
29  
30  
31  
32  
33  
34  
35  
36  
37  
38  
39  
40  
41  
42  
43  
44  
45  
46  
47  
48  
49  
50  
51  
52  
53  
54  
55  
56  
57  
58  
59  
60  
Capital Medical University (2018-k-62).

## 26 **Acknowledgements**

30  
31 We thank MacArthur's Lab for sharing the comprehensive collections of gene lists. We  
32  
33  
34  
35  
36  
37  
38  
39  
40  
41  
42  
43  
44  
45  
46  
47  
48  
49  
50  
51  
52  
53  
54  
55  
56  
57  
58  
59  
60  
thank Dr. Sree Rohit Raj Kolora for reviewing, revising the manuscript and useful  
discussion.

## 42 **References**

1. Bitta M, Kariuki SM, Abubakar A, et al. Burden of neurodevelopmental disorders in  
low and middle-income countries: A systematic review and meta-analysis.  
*Wellcome Open Res* 2017;2:121. doi: 10.12688/wellcomeopenres.13540.3
2. America's Children and the Environment. Health: Neurodevelopmental Disorders –  
Report Contents, 2019.

- 1  
2  
3  
4 3. Gaugler T, Klei L, Sanders SJ, et al. Most genetic risk for autism resides with  
5  
6 common variation. *Nat Genet* 2014;46:881-5. doi: 10.1038/ng.3039  
7  
8
- 9  
10 4. Larsson H, Chang Z, D'Onofrio BM, et al. The heritability of clinically diagnosed  
11  
12 attention deficit hyperactivity disorder across the lifespan. *Psychol Med*  
13  
14 2014;44:2223-9. doi: 10.1017/S0033291713002493  
15  
16
- 17  
18 5. Cardno AG, Marshall EJ, Coid B, et al. Heritability estimates for psychotic disorders:  
19  
20 the Maudsley twin psychosis series. *Arch Gen Psychiatry* 1999;56:162-8. doi:  
21  
22 10.1001/archpsyc.56.2.162  
23  
24
- 25  
26 6. Marshall CR, Howrigan DP, Merico D, et al. Contribution of copy number variants  
27  
28 to schizophrenia from a genome-wide study of 41,321 subjects. *Nat Genet*  
29  
30 2017;49:27-35. doi: 10.1038/ng.3725  
31  
32
- 33  
34 7. Brandler WM, Antaki D, Gujral M, et al. Paternally inherited cis-regulatory structural  
35  
36 variants are associated with autism. *Science* 2018;360:327-31. doi:  
37  
38 10.1126/science.aan2261  
39  
40
- 41  
42 8. Coe BP, Stessman HAF, Sulovari A, et al. Neurodevelopmental disease genes  
43  
44 implicated by de novo mutation and copy number variation morbidity. *Nat*  
45  
46 *Genet* 2019;51:106-16. doi: 10.1038/s41588-018-0288-4  
47  
48
- 49  
50 9. Devanna P, Chen XS, Ho J, et al. Next-gen sequencing identifies non-coding  
51  
52 variation disrupting miRNA-binding sites in neurological disorders. *Mol*  
53  
54 *Psychiatry* 2018;23:1375-84. doi: 10.1038/mp.2017.30  
55  
56
- 57  
58 10. Adzhubei IA, Schmidt S, Peshkin L, et al. A method and server for predicting  
59  
60

- 1  
2  
3  
4 damaging missense mutations. *Nat Methods* 2010;7:248-9. doi:  
5  
6 10.1038/nmeth0410-248  
7  
8  
9  
10 11. Jaganathan K, Kyriazopoulou Panagiotopoulou S, McRae JF, et al. Predicting  
11  
12 Splicing from Primary Sequence with Deep Learning. *Cell* 2019;176:535-48  
13  
14 e24. doi: 10.1016/j.cell.2018.12.015  
15  
16  
17  
18 12. Ganel L, Abel HJ, FinMetSeq C, et al. SVScore: an impact prediction tool for  
19  
20 structural variation. *Bioinformatics* 2017;33:1083-85. doi:  
21  
22 10.1093/bioinformatics/btw789  
23  
24  
25  
26 13. Kumar S, Harmanci A, Vytheeswaran J, et al. SVFX: a machine learning framework  
27  
28 to quantify the pathogenicity of structural variants. *Genome Biol* 2020;21:274.  
29  
30 doi: 10.1186/s13059-020-02178-x  
31  
32  
33  
34 14. Yang Y, Wang X, Zhou D, et al. SVPath: an accurate pipeline for predicting the  
35  
36 pathogenicity of human exon structural variants. *Brief Bioinform* 2022;23:  
37  
38 bbac014 doi: 10.1093/bib/bbac014  
39  
40  
41  
42 15. Geoffroy V, Guignard T, Kress A, et al. AnnotSV and knotAnnotSV: a web server  
43  
44 for human structural variations annotations, ranking and analysis. *Nucleic Acids*  
45  
46 *Res* 2021;49:W21-W28. doi: 10.1093/nar/gkab402  
47  
48  
49  
50 16. Coe BP, Witherspoon K, Rosenfeld JA, et al. Refining analyses of copy number  
51  
52 variation identifies specific genes associated with developmental delay. *Nat*  
53  
54 *Genet* 2014;46:1063-71. doi: 10.1038/ng.3092  
55  
56  
57  
58 17. Cooper GM, Coe BP, Girirajan S, et al. A copy number variation morbidity map of  
59  
60

- developmental delay. *Nat Genet* 2011;43:838-46. doi: 10.1038/ng.909
18. Sanders SJ, He X, Willsey AJ, et al. Insights into Autism Spectrum Disorder Genomic Architecture and Biology from 71 Risk Loci. *Neuron* 2015;87:1215-33. doi: 10.1016/j.neuron.2015.09.016
19. Zarrei M, Burton CL, Engchuan W, et al. A large data resource of genomic copy number variation across neurodevelopmental disorders. *NPJ Genom Med* 2019;4:26. doi: 10.1038/s41525-019-0098-3
20. Davis CA, Hitz BC, Sloan CA, et al. The Encyclopedia of DNA elements (ENCODE): data portal update. *Nucleic Acids Res* 2018;46:D794-D801. doi: 10.1093/nar/gkx1081
21. Roadmap Epigenomics C, Kundaje A, Meuleman W, et al. Integrative analysis of 111 reference human epigenomes. *Nature* 2015;518:317-30. doi: 10.1038/nature14248
22. Boix CA, James BT, Park YP, et al. Regulatory genomic circuitry of human disease loci by integrative epigenomics. *Nature* 2021;590:300-07. doi: 10.1038/s41586-020-03145-z
23. Wang D, Liu S, Warrell J, et al. Comprehensive functional genomic resource and integrative model for the human brain. *Science* 2018;362:eaat8464. doi: 10.1126/science.aat8464
24. Sugathan A, Biagioli M, Golzio C, et al. CHD8 regulates neurodevelopmental pathways associated with autism spectrum disorder in neural progenitors. *Proc*

- 1  
2  
3  
4 *Natl Acad Sci U.S.A.* 2014;111:E4468-77. doi: 10.1073/pnas.1405266111  
5  
6  
7 25. Bayes A, van de Lagemaat LN, Collins MO, et al. Characterization of the proteome,  
8  
9 diseases and evolution of the human postsynaptic density. *Nat Neurosci*  
10  
11 2011;14:19-21. doi: 10.1038/nn.2719  
12  
13  
14  
15 26. Doan RN, Bae BI, Cubelos B, et al. Mutations in Human Accelerated Regions  
16  
17 Disrupt Cognition and Social Behavior. *Cell* 2016;167:341-54 e12. doi:  
18  
19 10.1016/j.cell.2016.08.071  
20  
21  
22  
23 27. Kellis M, Wold B, Snyder MP, et al. Defining functional DNA elements in the  
24  
25 human genome. *Proc Natl Acad Sci U.S.A.* 2014;111:6131-8. doi:  
26  
27 10.1073/pnas.1318948111  
28  
29  
30  
31 28. Richards S, Aziz N, Bale S, et al. Standards and guidelines for the interpretation of  
32  
33 sequence variants: a joint consensus recommendation of the American College  
34  
35 of Medical Genetics and Genomics and the Association for Molecular  
36  
37 Pathology. *Genet Med* 2015;17:405-24. doi: 10.1038/gim.2015.30  
38  
39  
40  
41  
42 29. Han X, Chen S, Flynn E, et al. Distinct epigenomic patterns are associated with  
43  
44 haploinsufficiency and predict risk genes of developmental disorders. *Nat*  
45  
46 *Commun* 2018;9:2138. doi: 10.1038/s41467-018-04552-7  
47  
48  
49  
50 30. Hughes HK, Mills Ko E, Rose D, et al. Immune Dysfunction and Autoimmunity as  
51  
52 Pathological Mechanisms in Autism Spectrum Disorders. *Front Cell Neurosci*  
53  
54 2018;12:405. doi: 10.3389/fncel.2018.00405  
55  
56  
57  
58 31. Severance EG, Prandovszky E, Castiglione J, et al. Gastroenterology issues in  
59  
60

- 1  
2  
3  
4 schizophrenia: why the gut matters. *Curr Psychiatry Rep* 2015;17:27. doi:  
5  
6 10.1007/s11920-015-0574-0  
7  
8  
9  
10 32. Wu S, Ding Y, Wu F, et al. Family history of autoimmune diseases is associated  
11 with an increased risk of autism in children: A systematic review and meta-  
12 analysis. *Neurosci Biobehav Rev* 2015;55:322-32. doi:  
13  
14 10.1016/j.neubiorev.2015.05.004  
15  
16  
17  
18  
19  
20 33. Bauman MD, Iosif AM, Ashwood P, et al. Maternal antibodies from mothers of  
21 children with autism alter brain growth and social behavior development in the  
22 rhesus monkey. *Transl Psychiatry* 2013;3:e278. doi: 10.1038/tp.2013.47  
23  
24  
25  
26  
27  
28 34. Hertz-Picciotto I, Croen LA, Hansen R, et al. The CHARGE study: an  
29 epidemiologic investigation of genetic and environmental factors contributing  
30 to autism. *Environ Health Perspect* 2006;114:1119-25. doi: 10.1289/ehp.8483  
31  
32  
33  
34  
35  
36 35. Won H, de la Torre-Ubieta L, Stein JL, et al. Chromosome conformation elucidates  
37 regulatory relationships in developing human brain. *Nature* 2016;538:523-27.  
38  
39  
40  
41  
42  
43  
44  
45  
46  
47  
48  
49  
50  
51  
52

### Figure Legends

53 **Figure 1.** The flowchart of neuroCNVscore development and evaluation in this study.  
54  
55 In Data Sets, the sources of training set and test set are listed. The training set was  
56  
57 derived from four NDDs studies under the case-control design, while the validation set  
58  
59  
60



1  
2  
3  
4 was from ClinVar and GnomAD. The numbers of raw and cleaned CNVs in the  
5  
6 brackets are indicated. LP, likely pathogenic. In Neuro-features, comprehensive  
7  
8 neuro/brain related features were gathered at gene, sequence, and functional/genomic  
9  
10 segments levels. In Prediction and Validation, biological validations were performed in  
11  
12 two ways: 1) correlation analyses between phyloP46way and the pathogenic scores  
13  
14 generated by the new model where phyloP46way was excluded from the feature matrix;  
15  
16 2) utilization of an independent set of NDD related gene lists including PSD genes to  
17  
18 cognition, CHD8 targets, and ASD risk genes.  
19  
20  
21  
22  
23  
24  
25  
26  
27

28 **Figure 2.** Comparisons of top three features between control and LP (likely pathogenic)  
29  
30 sets. The top three significant features between control and LP sets in copy number loss  
31  
32 (A) and copy number gain (B). The X-axis shows the types of significant features.  
33  
34 Fun\_level, Function/genomic segment level. The Y-axis displays the values of log-  
35  
36 transformed feature matrices. Unpaired *t*-tests were applied and significant levels were.  
37  
38  
39  
40  
41  
42 \*\*\*\*  $P < 0.0001$ .  
43  
44  
45  
46

47 **Figure 3.** Performances of Naïve Bayes, Logistic Regression, Support Vector Machine  
48  
49 (SVM) and XGBoost algorithms in evaluating CNVs. XGBoost showed superior  
50  
51 performance demonstrated by precision-recall curves and ROC curves for both copy  
52  
53 number loss (A, B) and copy number gain (C, D). AP: average precision; AUC: area  
54  
55 under curve.  
56  
57  
58  
59  
60

1  
2  
3  
4  
5  
6  
7 **Figure 4.** Performances of neuroCNVscore and SVScore in an independent set as  
8  
9 described in the flowchart of Figure 1. Precision-Recall (A) and ROC (B) curves were  
10  
11 calculated with copy number loss from the independent dataset; Precision-Recall (C)  
12  
13 and ROC (D) curves were calculated with copy number gain from the independent  
14  
15  
16  
17 dataset.  
18  
19

20  
21  
22  
23 **Figure 5.** Biological validation of neuroCNVscore. The plot (A) shows the  
24  
25 comparisons between PhyloP scores ( $\log_{10}(\text{PhyloP46way})$ ) and pathogenic scores  
26  
27 generated by excluding PhyloP46way from the original neuroCNVscore model, regions  
28  
29 with higher pathogenic scores tend to have higher PhyloP scores. The number of NDD  
30  
31 related genes (B) between the predicted LP and control groups in both copy number  
32  
33 loss and copy number gain models shows that more NDD related genes are found in LP  
34  
35 groups. For better presentation, log transformations were applied to PhyloP46way  
36  
37 scores and the gene counts.  $*P < 0.05$ .  
38  
39  
40  
41  
42  
43  
44  
45  
46  
47

48 **Figure 6.** Top 20 features obtained from feature importance analyses. Highly important  
49  
50 features of copy number loss model (A) and copy number gain model (B) are listed. All  
51  
52 the feature names were color-coded and formatted as following: feature type  
53  
54 (Fun\_/Gen\_/Seq\_feature names (original sources)\_tissue type (if applicable). Fun:  
55  
56 Function, in blue; Gen: Gene, in green; Seq: Sequence, in purple.  
57  
58  
59  
60

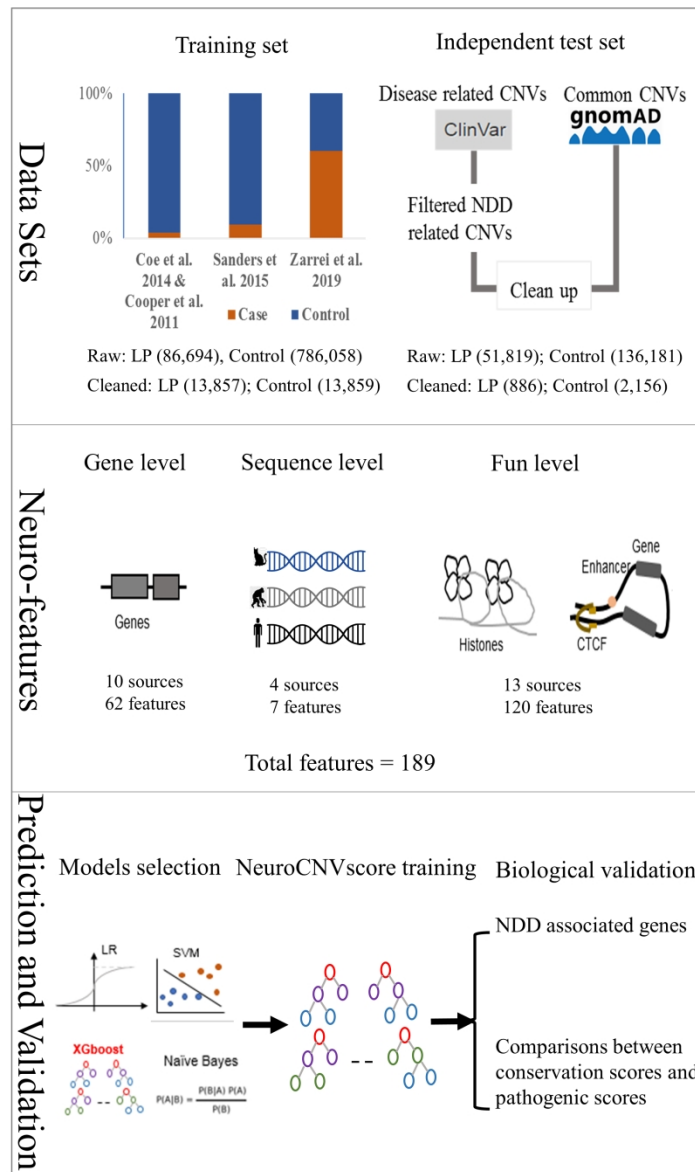

Figure 1

190x319mm (300 x 300 DPI)

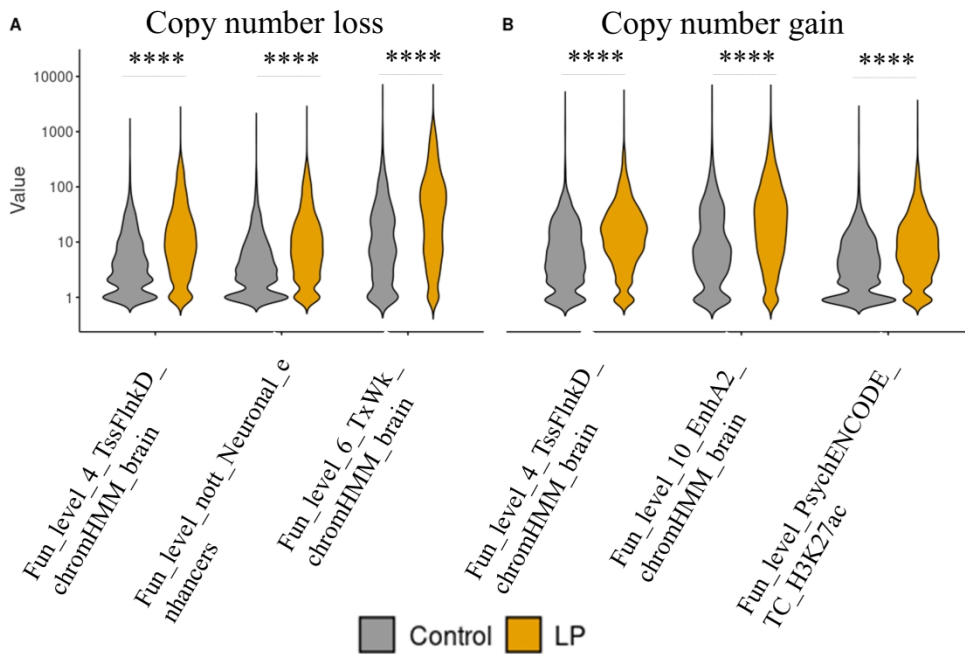

Figure 2

194x133mm (300 x 300 DPI)



Figure 3-XGBooster performance

252x172mm (300 x 300 DPI)



Figure 4-neuroCNV vs. SV

276x190mm (300 x 300 DPI)

1  
2  
3  
4  
5  
6  
7  
8  
9  
10  
11  
12  
13  
14  
15  
16  
17  
18  
19  
20  
21  
22  
23  
24  
25  
26  
27  
28  
29  
30  
31  
32  
33  
34  
35  
36  
37  
38  
39  
40  
41  
42  
43  
44  
45  
46  
47  
48  
49  
50  
51  
52  
53  
54  
55  
56  
57  
58  
59  
60

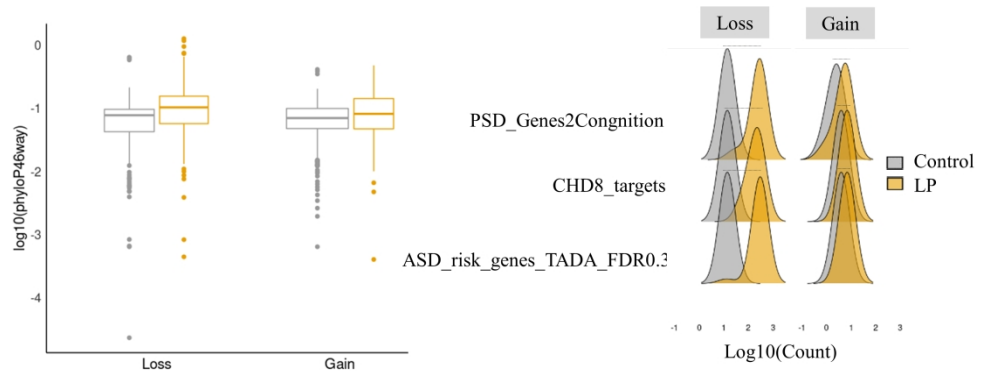

Figure 5

323x125mm (300 x 300 DPI)

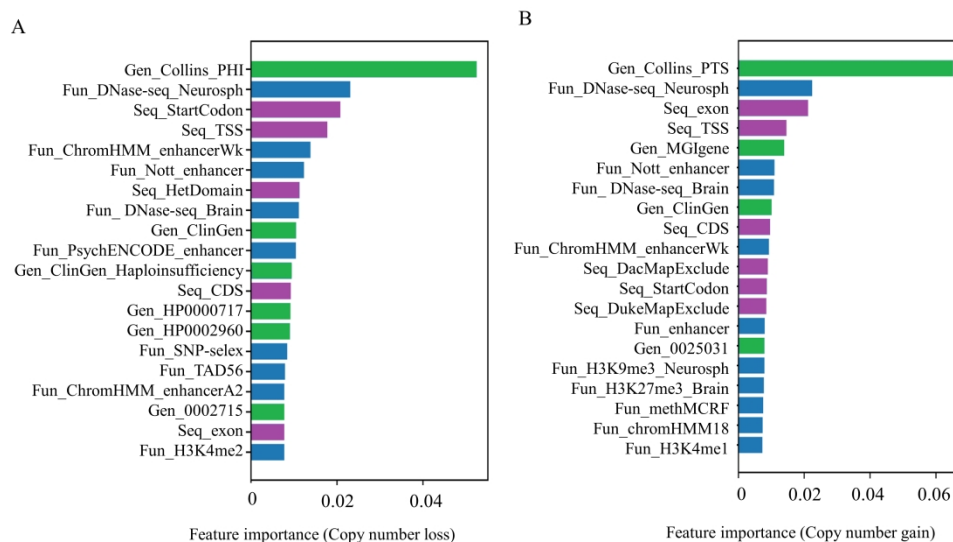

Figure 6

338x190mm (300 x 300 DPI)



## Supplementary Tables

**Table S1.** A detailed feature description. This table includes all features used in our model. These features are grouped into three levels: gene, functional/genomic segment and sequence. A brief description along with references is described on each feature.

| Feature category    | Feature set                               | Description                                                                                                                                                                                                                         | Feature type | References |
|---------------------|-------------------------------------------|-------------------------------------------------------------------------------------------------------------------------------------------------------------------------------------------------------------------------------------|--------------|------------|
| Gene level (N = 61) | Cell essential and nonessential genes     | CRISPR/Cas9 screens identified essential genes in human cell lines. Curated in <sup>2</sup>                                                                                                                                         | discrete     | 1          |
|                     | ClinGen curated genes and genomic regions | Genes and genomics regions were rated from 0 to 3, indicating an increased evidence on dosage sensitivity. Additional two levels (40,30) suggest unlikely dosage sensitive and genes associated with autosomal recessive phenotype. | discrete     | 3          |
|                     | DDG2P database                            | A curated list of genes linked to developmental disorders compiled by clinicians as part of the DDD study to facilitate clinical feedback on likely causal variants                                                                 | discrete     | 4          |
|                     | Dosage sensitive genes                    | Predicted score on dosage sensitive genes (i.e., haploinsufficiency or triplosensitivity)                                                                                                                                           | discrete     | 5, 34      |
|                     | FDA proved drug target                    | Genes with protein products that are mechanistic targets of FDA-approved drugs. Curated in <sup>2</sup>                                                                                                                             | discrete     | 6          |
|                     | G protein-coupled receptor                | GPCR list curated in <sup>2</sup>                                                                                                                                                                                                   | discrete     | 32, 33, 35 |
|                     | Mouse heterozygous LoF lethal             | Genes that are lethal in mouse models when inactivated heterozygous. Curated by <sup>2</sup>                                                                                                                                        | discrete     | 7          |
|                     | Neurodevelopmental process related genes  | Genes associated with various phenotypes from HPO: Abnormality of the nervous system (HP:0000707)-associated genes<br>Abnormality of nervous system physiology (HP:0012638)-associated                                              | discrete     | 8          |

|  |                     |                                                                                                                                                                                                                                                                                                                                                                                                                                                                                                                                                                                                                                                                                                                                                                                                                                                                                                                                                                                                                                                                                                                                                                                                                                                                                               |          |    |
|--|---------------------|-----------------------------------------------------------------------------------------------------------------------------------------------------------------------------------------------------------------------------------------------------------------------------------------------------------------------------------------------------------------------------------------------------------------------------------------------------------------------------------------------------------------------------------------------------------------------------------------------------------------------------------------------------------------------------------------------------------------------------------------------------------------------------------------------------------------------------------------------------------------------------------------------------------------------------------------------------------------------------------------------------------------------------------------------------------------------------------------------------------------------------------------------------------------------------------------------------------------------------------------------------------------------------------------------|----------|----|
|  |                     | <p>genes</p> <p>Behavioral abnormality (HP:0000708)-associated genes</p> <p>Abnormality of nervous system morphology (HP:0012639)-associated genes</p> <p>Abnormality of the immune system (HP:0002715)-associated genes</p> <p>Neurodevelopmental abnormality (HP:0012759)-associated genes</p> <p>Autoimmunity (HP:0002960)-associated genes</p> <p>Morphological abnormality of the central nervous system (HP:0002011)-associated genes</p> <p>Schizophrenia (HP:0100753)-associated genes</p> <p>Autistic behavior (HP:0000729)-associated genes</p> <p>Abnormality of movement (HP:0100022)-associated genes</p> <p>Seizures (HP:0001250)-associated genes</p> <p>Autism (HP:0000717)-associated genes</p> <p>Hyperactivity (HP:0000752)-associated genes</p> <p>Abnormality of prenatal development or birth (HP:0001197)-associated genes</p> <p>Impairment in personality functioning (HP:0031466)-associated genes</p> <p>Abnormality of the digestive system (HP:0025031)-associated genes</p> <p>Growth abnormality (HP:0001507)-associated genes</p> <p>Abnormal fear/anxiety-related behavior (HP:0100852)-associated genes</p> <p>Abnormality of brain morphology (HP:0012443)-associated genes</p> <p>Abnormality of higher mental function (HP:0011446)-associated genes</p> |          |    |
|  | Olfactory receptors | Any HUGO-recognized family of olfactory receptor genes                                                                                                                                                                                                                                                                                                                                                                                                                                                                                                                                                                                                                                                                                                                                                                                                                                                                                                                                                                                                                                                                                                                                                                                                                                        | discrete | 9  |
|  | SFARI gene          | Genes implicated in autism susceptibility                                                                                                                                                                                                                                                                                                                                                                                                                                                                                                                                                                                                                                                                                                                                                                                                                                                                                                                                                                                                                                                                                                                                                                                                                                                     | discrete | 10 |

1  
2  
3  
4  
5  
6  
7  
8  
9  
10  
11  
12  
13  
14  
15  
16  
17  
18  
19  
20  
21  
22  
23  
24  
25  
26  
27  
28  
29  
30  
31  
32  
33  
34  
35  
36  
37  
38  
39  
40  
41  
42  
43  
44  
45  
46

|                                                                                                                                   |                            |                                                                                                                                                          |            |    |
|-----------------------------------------------------------------------------------------------------------------------------------|----------------------------|----------------------------------------------------------------------------------------------------------------------------------------------------------|------------|----|
| Functional/genomic segment level (N = 121)                                                                                        | Chromatin states           | Brain related chromatin states inferred by the extended 18-way ChromHMM model across 98 tissues from the Roadmap Epigenomics Project                     | discrete   | 11 |
|                                                                                                                                   | CTCF binding sites         | Genome wide observed CTCF binding sites from Brain                                                                                                       | continuous | 12 |
|                                                                                                                                   |                            | Genome wide CTCF binding sites from 7 cell lines generated by CHIP-seq. Curated by UCSC                                                                  | continuous | 13 |
|                                                                                                                                   | DNA Accessibility          | ATAC-seq from brain and neurosph.                                                                                                                        | continuous | 13 |
|                                                                                                                                   | DNase hypersensitive sites | Observed DNase I hypersensitive areas from brain and neurosph.                                                                                           | continuous | 13 |
|                                                                                                                                   |                            | DNase hypersensitive sites assayed from a collection of cell types. Download from UCSC table browser NAR 2004                                            | continuous | 14 |
|                                                                                                                                   |                            | RoadmapDNasePromCount                                                                                                                                    | discrete   | 15 |
|                                                                                                                                   | Enhancers                  | Brain cell type-specific enhancers identified by PLAC-seq                                                                                                | discrete   | 16 |
|                                                                                                                                   |                            | dbSUPER: Super enhancers from Brain Angular Gyrus; Brain Anterior Caudate; Brain Cingulate Gyrus; Brain Hippocampus Middle; Brain Inferior Temporal Lobe | discrete   | 17 |
|                                                                                                                                   |                            | EpiMap: enhancers from the brain and neurosph.                                                                                                           | discrete   | 12 |
|                                                                                                                                   |                            | EnhancerAtlas 2.0: Enhancer predictions in 197 human cell lines & tissues                                                                                | discrete   | 18 |
|                                                                                                                                   |                            | FANTOM Enhancers: Enhancer predictions for human tissues and cell types from the FANTOM5 consortium                                                      | discrete   | 19 |
| HACER: Active enhancer predictions in human cell lines & tissues based on PRO-seq, GRO-seq, or CAGE data                          |                            | discrete                                                                                                                                                 | 20         |    |
| PsychENCODE: PEC EnhancersDER-03a_hg19_PEC_enhancers_clean.bed                                                                    |                            | discrete                                                                                                                                                 | 21         |    |
| SEA: Super enhancer predictions from 143 human cell lines and tissues (mapped back to hg19 using liftOver with minimum 75% match) | discrete                   | 23                                                                                                                                                       |            |    |

|  |                                                                                     |                                                                                                                                                                                                |            |    |
|--|-------------------------------------------------------------------------------------|------------------------------------------------------------------------------------------------------------------------------------------------------------------------------------------------|------------|----|
|  |                                                                                     | Sedb: Super enhancer and typical enhancer predictions from 541 human cell lines and tissues                                                                                                    | discrete   | 22 |
|  |                                                                                     | VISTA: Experimentally-validated mammalian enhancers                                                                                                                                            | discrete   | 24 |
|  | Genomic segmentations                                                               | All autosomal, protein-coding genes; CDS; exon; Selenocysteine; start_codon; stop_codon; transcript UTR                                                                                        | discrete   | 25 |
|  | Histone markers                                                                     | H2AFZ, H2AK5ac, H2AK9ac, H2BK120ac, H2BK12ac, H2BK15ac, H2BK20ac, H2BK5ac, H3F3A, H3K27ac, H3K4ac, H3K4me1, H3K4me2, H3K4me3, H3K9ac, H3K9me1, H3K9me2, H3K9me3 from the brain or neurosph     | continuous | 12 |
|  |                                                                                     | H3K27ac peaks for the Prefrontal Cortex, the Temporal Cortex, and the Cerebellar Cortex                                                                                                        | continuous | 21 |
|  | Long range probable genes                                                           | Target genes by prediction on GWAS hits and 3D chromatin structures                                                                                                                            | discrete   | 26 |
|  | Loop anchors and topological associated domains in higher-order chromatin structure | TAD boundaries (defined as the start and end coordinates for each TAD $\pm$ 5kb) from 30 samples meeting our ENCODE data inclusion criteria available for download from the ENCODE Data Portal | continuous | 14 |
|  |                                                                                     | Selected "derived" datasets from PsychENCODE Integrated Analysis Package, including cortex enhancers, transcriptionally active regions, TAD boundaries, and H3k27ac peaks                      | continuous | 21 |
|  |                                                                                     | Yue labs                                                                                                                                                                                       | continuous | 27 |
|  | Methylation                                                                         | MeDIP/MRE (mCRF) methylation calls                                                                                                                                                             | continuous | 15 |
|  | Transcript active regions                                                           | Cortex Transcriptionally Active Regions are found within at least 70% of the individuals                                                                                                       | continuous | 21 |
|  | Transcript factor binding sites                                                     | SNP-SELEX                                                                                                                                                                                      | discrete   | 28 |
|  | Transcript starting sites                                                           | The 2000bp flanking regions about transcript starting sites                                                                                                                                    | discrete   | 36 |

1  
2  
3  
4  
5  
6  
7  
8  
9  
10  
11  
12  
13  
14  
15  
16  
17  
18  
19  
20  
21  
22  
23  
24  
25  
26  
27  
28  
29  
30  
31  
32  
33  
34  
35  
36  
37  
38  
39  
40  
41  
42  
43  
44  
45  
46

|                        |                                  |                                                                                                                                                                    |            |    |
|------------------------|----------------------------------|--------------------------------------------------------------------------------------------------------------------------------------------------------------------|------------|----|
| Sequence level (N = 7) | Blacklisted regions              | Genome regions have anomalous, unstructured, high signal/read counts (DacMapExclude), problematic regions for short sequence tag signal detection (DukeMapExclude) | discrete   | 29 |
|                        | Cross species conservation score | The conservation scoring (phylop46way, phastcon46way) for multiple alignments of 45 vertebrate genomes to the human genome                                         | continuous | 29 |
|                        | GC content                       | GC content calculated with a "span" size of 5 bases                                                                                                                | continuous | 29 |
|                        | Heterochromatin positions        | It is calculated based on H3K9me3 enrichment regions                                                                                                               | discrete   | 30 |
|                        | Human accelerated regions        | Human accelerated regions are conserved genomic loci with elevated divergence in humans                                                                            | discrete   | 31 |

**Table S2.** Individual feature comparisons. This table compares all of the features used in the copy number loss and copy number gain models. The comparisons were made using the two-tailed Wilcoxon rank-sum test, with a significant cut off of  $P = 0.05$ . All the feature names were reformatted as followed: feature type (Fun\_level/Gen\_level/Seq\_level)\_feature names(original sources)\_tissue type (if applicable). Fun: Function; Gen: Gene; Seq: Sequence.

| Source                                                         | Features in copy number loss model                      | P value                          | Source                                                         | Features in copy number gain model                      | P value |
|----------------------------------------------------------------|---------------------------------------------------------|----------------------------------|----------------------------------------------------------------|---------------------------------------------------------|---------|
| <b>Functional/<br/>genomic<br/>segment<br/>level</b>           | <i>Fun_level_significant features are 80 out of 120</i> |                                  | <b>Functional/<br/>genomic<br/>segment<br/>level</b>           | <i>Fun_level_significant features are 75 out of 120</i> |         |
| Chromatin<br>states from<br>Roadmap<br>Epigenomic<br>s Project | Fun_level_1_TssA_chromHMM_brain                         | ~0                               | Chromatin<br>states from<br>Roadmap<br>Epigenomic<br>s Project | Fun_level_1_TssA_chromHMM_brain                         | ~0      |
|                                                                | Fun_level_10_EnhA2_chromHMM_brain                       | ~0                               |                                                                | Fun_level_10_EnhA2_chromHMM_brain                       | ~0      |
|                                                                | Fun_level_11_EnhWk_chromHMM_brain                       | ~0                               |                                                                | Fun_level_11_EnhWk_chromHMM_brain                       | ~0      |
|                                                                | Fun_level_12_ZNF_chromHMM_brain                         | ~0                               |                                                                | Fun_level_12_ZNF_chromHMM_brain                         | 0.0003  |
|                                                                | Fun_level_13_Het_chromHMM_brain                         | ~0                               |                                                                | Fun_level_13_Het_chromHMM_brain                         | ~0      |
|                                                                | Fun_level_14_TssBiv_chromHMM_brain                      | 0.1050                           |                                                                | Fun_level_14_TssBiv_chromHMM_brain                      | ~0      |
|                                                                | Fun_level_15_EnhBiv_chromHMM_brain                      | ~0                               |                                                                | Fun_level_15_EnhBiv_chromHMM_brain                      | ~0      |
|                                                                | Fun_level_16_ReprPC_chromHMM_brain                      | ~0                               |                                                                | Fun_level_16_ReprPC_chromHMM_brain                      | 0.9910  |
|                                                                | Fun_level_17_ReprPCWk_chromHMM_brain                    | 0.0498                           |                                                                | Fun_level_17_ReprPCWk_chromHMM_brain                    | ~0      |
|                                                                | Fun_level_18_Quies_chromHMM_brain                       | ~0                               |                                                                | Fun_level_18_Quies_chromHMM_brain                       | ~0      |
|                                                                | Fun_level_2_TssFlnk_chromHMM_brain                      | ~0                               |                                                                | Fun_level_2_TssFlnk_chromHMM_brain                      | ~0      |
|                                                                | Fun_level_3_TssFlnkU_chromHMM_brain                     | ~0                               |                                                                | Fun_level_3_TssFlnkU_chromHMM_brain                     | ~0      |
|                                                                | Fun_level_4_TssFlnkD_chromHMM_brain                     | ~0                               |                                                                | Fun_level_4_TssFlnkD_chromHMM_brain                     | ~0      |
|                                                                | Fun_level_5_Tx_chromHMM_brain                           | ~0                               |                                                                | Fun_level_5_Tx_chromHMM_brain                           | ~0      |
| Fun_level_6_TxWk_chromHMM_brain                                | ~0                                                      | Fun_level_6_TxWk_chromHMM_brain  | ~0                                                             |                                                         |         |
| Fun_level_7_EnhG1_chromHMM_brain                               | ~0                                                      | Fun_level_7_EnhG1_chromHMM_brain | ~0                                                             |                                                         |         |

1  
2  
3  
4  
5  
6  
7  
8  
9  
10  
11  
12  
13  
14  
15  
16  
17  
18  
19  
20  
21  
22  
23  
24  
25  
26  
27  
28  
29  
30  
31  
32  
33  
34  
35  
36  
37  
38  
39  
40  
41  
42  
43  
44  
45  
46

|           |                                                  |        |           |                                                  |        |
|-----------|--------------------------------------------------|--------|-----------|--------------------------------------------------|--------|
|           | Fun_level_8_EnhG2_chromHMM_brain                 | ~0     |           | Fun_level_8_EnhG2_chromHMM_brain                 | ~0     |
|           | Fun_level_9_EnhA1_chromHMM_brain                 | ~0     |           | Fun_level_9_EnhA1_chromHMM_brain                 | ~0     |
| Enhancers | Fun_level_dbsuper_Brain_Angular_Gyrus            | ~0     | Enhancers | Fun_level_dbsuper_Brain_Angular_Gyrus            | ~0     |
|           | Fun_level_dbsuper_Brain_Anterior_Caudate         | ~0     |           | Fun_level_dbsuper_Brain_Anterior_Caudate         | ~0     |
|           | Fun_level_dbsuper_Brain_Cingulate_Gyrus          | ~0     |           | Fun_level_dbsuper_Brain_Cingulate_Gyrus          | ~0     |
|           | Fun_level_dbsuper_Brain_Hippocampus_Middle_150   | ~0     |           | Fun_level_dbsuper_Brain_Hippocampus_Middle_150   | ~0     |
|           | Fun_level_dbsuper_Brain_Hippocampus_Middle       | ~0     |           | Fun_level_dbsuper_Brain_Hippocampus_Middle       | ~0     |
|           | Fun_level_dbsuper_Brain_Inferior_Temporal_Lobe   | ~0     |           | Fun_level_dbsuper_Brain_Inferior_Temporal_Lobe   | ~0     |
|           | Fun_level_dbsuper_Brain_Mid_Frontal_Lobe         | 0.0293 |           | Fun_level_dbsuper_Brain_Mid_Frontal_Lobe         | 0.0266 |
|           | Fun_level_famton_astrocyte                       | 0.0004 |           | Fun_level_famton_astrocyte                       | 0.0230 |
|           | Fun_level_famton_brain                           | 0.4890 |           | Fun_level_famton_brain                           | 0.6620 |
|           | Fun_level_famton_CL:0000127                      | 0.0001 |           | Fun_level_famton_CL:0000127                      | ~0     |
|           | Fun_level_famton_count                           | ~0     |           | Fun_level_famton_count                           | ~0     |
|           | Fun_level_famton_neuronal_stem_cell              | 0.3280 |           | Fun_level_famton_neuronal_stem_cell              | 0.6990 |
|           | Fun_level_famton_permssive                       | ~0     |           | Fun_level_famton_permssive                       | ~0     |
|           | Fun_level_enhancerAtlas_Astrocyte_EP             | ~0     |           | Fun_level_enhancerAtlas_Astrocyte_EP             | ~0     |
|           | Fun_level_enhancerAtlas_Cerebellum_EP            | ~0     |           | Fun_level_enhancerAtlas_Cerebellum_EP            | ~0     |
|           | Fun_level_enhancerAtlas_ESC_neuron_EP            | ~0     |           | Fun_level_enhancerAtlas_ESC_neuron_EP            | ~0     |
|           | Fun_level_gene_enhancer_links_brain_enhcenter    | ~0     |           | Fun_level_gene_enhancer_links_brain_enhcenter    | ~0     |
|           | Fun_level_gene_enhancer_links_neurosph_enhcenter | ~0     |           | Fun_level_gene_enhancer_links_neurosph_enhcenter | ~0     |
|           | Fun_level_hacer_T1                               | ~0     |           | Fun_level_hacer_T1                               | ~0     |
|           | Fun_level_SE_ele                                 | ~0     |           | Fun_level_SE_ele                                 | ~0     |

|                                    |                                      |        |                                    |                                      |        |
|------------------------------------|--------------------------------------|--------|------------------------------------|--------------------------------------|--------|
|                                    | Fun_level_SEA00101                   | ~0     |                                    | Fun_level_SEA00101                   | ~0     |
|                                    | Fun_level_nott_Astrocyte_enhancers   | ~0     |                                    | Fun_level_nott_Astrocyte_enhancers   | ~0     |
|                                    | Fun_level_nott_Astrocyte_promoters   | ~0     |                                    | Fun_level_nott_Astrocyte_promoters   | ~0     |
|                                    | Fun_level_nott_H3K4me3_around_TSS    | ~0     |                                    | Fun_level_nott_H3K4me3_around_TSS    | ~0     |
|                                    | Fun_level_nott_Microglia_enhancers   | ~0     |                                    | Fun_level_nott_Microglia_enhancers   | ~0     |
|                                    | Fun_level_nott_Microglia_promoters   | ~0     |                                    | Fun_level_nott_Microglia_promoters   | ~0     |
|                                    | Fun_level_nott_Neuronal_enhancers    | ~0     |                                    | Fun_level_nott_Neuronal_enhancers    | ~0     |
|                                    | Fun_level_nott_Neuronal_promoters    | ~0     |                                    | Fun_level_nott_Neuronal_promoters    | ~0     |
|                                    | Fun_level_nott_Oligo_enhancers       | ~0     |                                    | Fun_level_nott_Oligo_enhancers       | ~0     |
|                                    | Fun_level_nott_Oligo_promoters       | ~0     |                                    | Fun_level_nott_Oligo_promoters       | ~0     |
|                                    | Fun_level_nott_superEnhancer         | 1      |                                    | Fun_level_nott_superEnhancer         | 1      |
|                                    | Fun_level_vista                      | ~0     |                                    | Fun_level_vista                      | ~0     |
| CTCF binding sites                 | Fun_level_ctcf                       | ~0     | CTCF binding sites                 | Fun_level_ctcf                       | ~0     |
|                                    | Fun_level_CTCF_observed_Brain        | ~0     |                                    | Fun_level_CTCF_observed_Brain        | ~0     |
| DNase hypersensitive sites         | Fun_level_DNaseIClusterd             | ~0     | DNase hypersensitive sites         | Fun_level_DNaseIClusterd             | ~0     |
|                                    | Fun_level_DnaseMaster                | ~0     |                                    | Fun_level_DnaseMaster                | ~0     |
|                                    | Fun_level_DNase-seq_observed_Brain   | ~0     |                                    | Fun_level_DNase-seq_observed_Brain   | ~0     |
|                                    | Fun_level_DNase-seq_observed_Neurosp | ~0     |                                    | Fun_level_DNase-seq_observed_Neurosp | ~0     |
| Genomic segmentations from Gencode | Fun_level_EncodeAvgTfbsBroadNhaCtcf  | ~0     | Genomic segmentations from Gencode | Fun_level_EncodeAvgTfbsBroadNhaCtcf  | ~0     |
|                                    | Fun_level_EncodeRegTfbsClustered     | ~0     |                                    | Fun_level_EncodeRegTfbsClustered     | ~0     |
|                                    | Fun_level_gencode_CDS                | ~0     |                                    | Fun_level_gencode_CDS                | ~0     |
|                                    | Fun_level_gencode_exon               | 0.5440 |                                    | Fun_level_gencode_exon               | ~0     |
|                                    | Fun_level_gencode_gene               | ~0     |                                    | Fun_level_gencode_gene               | ~0     |
|                                    | Fun_level_gencode_Selenocysteine     | 0.5450 |                                    | Fun_level_gencode_Selenocysteine     | 0.6280 |
|                                    | Fun_level_gencode_start_codon        | 0.2450 |                                    | Fun_level_gencode_start_codon        | ~0     |



1  
2  
3  
4  
5  
6  
7  
8  
9  
10  
11  
12  
13  
14  
15  
16  
17  
18  
19  
20  
21  
22  
23  
24  
25  
26  
27  
28  
29  
30  
31  
32  
33  
34  
35  
36  
37  
38  
39  
40  
41  
42  
43  
44  
45  
46

|                                     |                                     |                                     |                 |                                     |        |
|-------------------------------------|-------------------------------------|-------------------------------------|-----------------|-------------------------------------|--------|
|                                     | Fun_level_gencode_stop_codon        | ~0                                  |                 | Fun_level_gencode_stop_codon        | ~0     |
|                                     | Fun_level_gencode_transcript        | 0.8590                              |                 | Fun_level_gencode_transcript        | 0.8330 |
|                                     | Fun_level_gencode_UTR               | ~0                                  |                 | Fun_level_gencode_UTR               | ~0     |
|                                     | Fun_level_miRNA                     | ~0                                  |                 | Fun_level_miRNA                     | ~0     |
|                                     | Fun_level_non-codingRNAs            | ~0                                  |                 | Fun_level_non-codingRNAs            | 0.0010 |
| Histone markers                     | Fun_level_ATAC-seq_observed_Brain   | ~0                                  | Histone markers | Fun_level_ATAC-seq_observed_Brain   | ~0     |
|                                     | Fun_level_H2AFZ_imputed_Brain       | ~0                                  |                 | Fun_level_H2AFZ_imputed_Brain       | ~0     |
|                                     | Fun_level_EP300_imputed_Brain       | ~0                                  |                 | Fun_level_EP300_imputed_Brain       | ~0     |
|                                     | Fun_level_EP300_imputed_Neurosph    | ~0                                  |                 | Fun_level_EP300_imputed_Neurosph    | ~0     |
|                                     | Fun_level_H2AFZ_imputed_Neurosph    | ~0                                  |                 | Fun_level_H2AFZ_imputed_Neurosph    | ~0     |
|                                     | Fun_level_H2AFZ_observed_Brain      | ~0                                  |                 | Fun_level_H2AFZ_observed_Brain      | ~0     |
|                                     | Fun_level_H3k27ac                   | ~0                                  |                 | Fun_level_H3k27ac                   | ~0     |
|                                     | Fun_level_H3K27ac_imputed_Brain     | ~0                                  |                 | Fun_level_H3K27ac_imputed_Brain     | ~0     |
|                                     | Fun_level_H3K27ac_imputed_Neurosph  | ~0                                  |                 | Fun_level_H3K27ac_imputed_Neurosph  | ~0     |
|                                     | Fun_level_H3K27ac_observed_Brain    | ~0                                  |                 | Fun_level_H3K27ac_observed_Brain    | ~0     |
|                                     | Fun_level_H3K27ac_observed_Neurosph | ~0                                  |                 | Fun_level_H3K27ac_observed_Neurosph | ~0     |
|                                     | Fun_level_H3K27me3_imputed_Brain    | ~0                                  |                 | Fun_level_H3K27me3_imputed_Brain    | ~0     |
|                                     | Fun_level_H3K27me3_imputed_Neurosph | ~0                                  |                 | Fun_level_H3K27me3_imputed_Neurosph | ~0     |
|                                     | Fun_level_H3K27me3_observed_Brain   | ~0                                  |                 | Fun_level_H3K27me3_observed_Brain   | ~0     |
|                                     | Fun_level_H3k4me1                   | ~0                                  |                 | Fun_level_H3k4me1                   | ~0     |
|                                     | Fun_level_H3K4me1_imputed_Brain     | ~0                                  |                 | Fun_level_H3K4me1_imputed_Brain     | ~0     |
|                                     | Fun_level_H3K4me1_imputed_Neurosph  | ~0                                  |                 | Fun_level_H3K4me1_imputed_Neurosph  | ~0     |
|                                     | Fun_level_H3K4me1_observed_Brain    | ~0                                  |                 | Fun_level_H3K4me1_observed_Brain    | ~0     |
| Fun_level_H3K4me1_observed_Neurosph | ~0                                  | Fun_level_H3K4me1_observed_Neurosph | ~0              |                                     |        |
|                                     | Fun_level_H3K4me2_observed_Brain    | ~0                                  |                 | Fun_level_H3K4me2_observed_Brain    | ~0     |

|                              |                                         |        |                              |                                         |        |
|------------------------------|-----------------------------------------|--------|------------------------------|-----------------------------------------|--------|
|                              | Fun_level_H3k4me3                       | ~0     |                              | Fun_level_H3k4me3                       | ~0     |
|                              | Fun_level_H3K4me3_imputed_Brain         | 0.0580 |                              | Fun_level_H3K4me3_imputed_Brain         | 0.4680 |
|                              | Fun_level_H3K4me3_imputed_Neuropsych    | ~0     |                              | Fun_level_H3K4me3_imputed_Neuropsych    | ~0     |
|                              | Fun_level_H3K4me3_observed_Brain        | 0.0592 |                              | Fun_level_H3K4me3_observed_Brain        | 0.4710 |
|                              | Fun_level_H3K4me3_observed_Neuropsych   | ~0     |                              | Fun_level_H3K4me3_observed_Neuropsych   | ~0     |
|                              | Fun_level_H3K9ac_imputed_Brain          | ~0     |                              | Fun_level_H3K9ac_imputed_Brain          | ~0     |
|                              | Fun_level_H3K9ac_imputed_Neuropsych     | ~0     |                              | Fun_level_H3K9ac_imputed_Neuropsych     | ~0     |
|                              | Fun_level_H3K9me3_imputed_Brain         | ~0     |                              | Fun_level_H3K9me3_imputed_Brain         | ~0     |
|                              | Fun_level_H3K9me3_imputed_Neuropsych    | ~0     |                              | Fun_level_H3K9me3_imputed_Neuropsych    | ~0     |
|                              | Fun_level_H3K9me3_observed_Brain        | ~0     |                              | Fun_level_H3K9me3_observed_Brain        | ~0     |
|                              | Fun_level_H3K9me3_observed_Neuropsych   | ~0     |                              | Fun_level_H3K9me3_observed_Neuropsych   | ~0     |
|                              | Fun_level_H4K20me1_imputed_Neuropsych   | ~0     |                              | Fun_level_H4K20me1_imputed_Neuropsych   | ~0     |
|                              | Fun_level_H4K20me1_observed_Brain       | ~0     |                              | Fun_level_H4K20me1_observed_Brain       | ~0     |
|                              | Fun_level_POLR2A_imputed_Neuropsych     | ~0     |                              | Fun_level_POLR2A_imputed_Neuropsych     | ~0     |
|                              | Fun_level_RAD21_imputed_Brain           | ~0     |                              | Fun_level_RAD21_imputed_Brain           | ~0     |
|                              | Fun_level_RAD21_imputed_Neuropsych      | ~0     |                              | Fun_level_RAD21_imputed_Neuropsych      | ~0     |
|                              | Fun_level_SMC3_imputed_Brain            | ~0     |                              | Fun_level_SMC3_imputed_Brain            | ~0     |
|                              | Fun_level_SMC3_imputed_Neuropsych       | ~0     |                              | Fun_level_SMC3_imputed_Neuropsych       | ~0     |
| Long range probable genes    | Fun_level_liu_csbj_targetgene           | ~0     | Long range probable genes    | Fun_level_liu_csbj_targetgene           | ~0     |
| Methylation                  | Fun_level_methMCRF                      | ~0     | Methylation                  | Fun_level_methMCRF                      | ~0     |
| Loop anchors and topological | Fun_level_PsychENCODE_CBC_H3K27ac       | ~0     | Loop anchors and topological | Fun_level_PsychENCODE_CBC_H3K27ac       | ~0     |
|                              | Fun_level_PsychENCODE_HiC_EP            | ~0     |                              | Fun_level_PsychENCODE_HiC_EP            | ~0     |
|                              | Fun_level_PsychENCODE_loops_interRegion | ~0     |                              | Fun_level_PsychENCODE_loops_interRegion | 0.1890 |

1  
2  
3  
4  
5  
6  
7  
8  
9  
10  
11  
12  
13  
14  
15  
16  
17  
18  
19  
20  
21  
22  
23  
24  
25  
26  
27  
28  
29  
30  
31  
32  
33  
34  
35  
36  
37  
38  
39  
40  
41  
42  
43  
44  
45  
46

|                                                        |                                                            |        |                                                        |                                                            |        |
|--------------------------------------------------------|------------------------------------------------------------|--------|--------------------------------------------------------|------------------------------------------------------------|--------|
| associated domains in higher-order chromatin structure | Fun_level_PsychENCODE_PEC_Enhancers                        | ~0     | associated domains in higher-order chromatin structure | Fun_level_PsychENCODE_PEC_Enhancers                        | ~0     |
|                                                        | Fun_level_PsychENCODE_PFC_H3K27ac                          | ~0     |                                                        | Fun_level_PsychENCODE_PFC_H3K27ac                          | ~0     |
|                                                        | Fun_level_PsychENCODE_TAR                                  | ~0     |                                                        | Fun_level_PsychENCODE_TAR                                  | ~0     |
|                                                        | Fun_level_PsychENCODE_TC_H3K27ac                           | ~0     |                                                        | Fun_level_PsychENCODE_TC_H3K27ac                           | ~0     |
|                                                        | Fun_level_TAD56                                            | ~0     |                                                        | Fun_level_TAD56                                            | ~0     |
| DNase hypersensitive sites                             | Fun_level_RoadmapDNasePromCount                            | ~0     | DNase hypersensitive sites                             | Fun_level_RoadmapDNasePromCount                            | ~0     |
| Transcript factor binding sites from snp-selex         | Fun_level_snp_selex                                        | 0.0860 | Transcript factor binding sites from snp-selex         | Fun_level_snp_selex                                        | 0.0403 |
| Transcript starting sites                              | Fun_level_tss2000bp                                        | ~0     | Transcript starting sites                              | Fun_level_tss2000bp                                        | 0.1450 |
| Higher-order chromatin structure from Yue lab          | Fun_level_yue_loops_hippo                                  | ~0     | Higher-order chromatin structure from Yue lab          | Fun_level_yue_loops_hippo                                  | ~0     |
| <b>Gene level</b>                                      | <i>The Gen_level_significant features are 34 out of 45</i> |        | <b>Gene level</b>                                      | <i>The Gen_level_significant features are 25 out of 45</i> |        |
| ClinGen curated                                        | Gen_level_ClinGen_haploinsufficiency_gene_0                | 0.0013 | ClinGen curated                                        | Gen_level_ClinGen_region_curation_Triplosensitivity_0      | 0.4450 |

|                           |                                                         |        |                           |                                                        |        |
|---------------------------|---------------------------------------------------------|--------|---------------------------|--------------------------------------------------------|--------|
| genes and genomic regions | Gen_level_ClinGen_haploinsufficiency_gene_1             | 0.0086 | genes and genomic regions | Gen_level_ClinGen_region_curation_Triplosensitivity_1  | 0.4030 |
|                           | Gen_level_ClinGen_haploinsufficiency_gene_2             | 0.5950 |                           | Gen_level_ClinGen_region_curation_Triplosensitivity_2  | 0.0603 |
|                           | Gen_level_ClinGen_haploinsufficiency_gene_3             | ~0     |                           | Gen_level_ClinGen_region_curation_Triplosensitivity_3  | 0.3880 |
|                           | Gen_level_ClinGen_haploinsufficiency_gene_30            | ~0     |                           | Gen_level_ClinGen_region_curation_Triplosensitivity_40 | ~0     |
|                           | Gen_level_ClinGen_haploinsufficiency_gene_40            | 0.7010 |                           | Gen_level_ClinGen_triplosensitivity_gene               | 0.7800 |
|                           | Gen_level_ClinGen_region_curation_Haploinsufficiency_0  | 0.8020 |                           | Gen_level_ClinGen_triplosensitivity_gene_0             | ~0     |
|                           | Gen_level_ClinGen_region_curation_Haploinsufficiency_1  | 0.8830 |                           | Gen_level_ClinGen_triplosensitivity_gene_1             | 0.9070 |
|                           | Gen_level_ClinGen_region_curation_Haploinsufficiency_2  | 0.8130 |                           | Gen_level_ClinGen_triplosensitivity_gene_2             | 0.9410 |
|                           | Gen_level_ClinGen_region_curation_Haploinsufficiency_3  | 0.0011 |                           | Gen_level_ClinGen_triplosensitivity_gene_3             | 1.0000 |
|                           | Gen_level_ClinGen_region_curation_Haploinsufficiency_30 | 0.9290 |                           | Gen_level_ClinGen_triplosensitivity_gene_30            | 1.0000 |
|                           | Gen_level_ClinGen_region_curation_Haploinsufficiency_40 | ~0     |                           | Gen_level_ClinGen_triplosensitivity_gene_40            | 1.0000 |
|                           | Gen_level_loss_of_function_score1                       | 0.0026 |                           | Gen_level_gain_activating_score1                       | 0.8030 |
|                           | Gen_level_loss_of_function_score2                       | ~0     |                           | Gen_level_gain_activating_score2                       | 0.6810 |
|                           | Gen_level_loss_of_function_score3                       | ~0     |                           | Gen_level_gain_activating_score3                       | 0.2840 |

1  
2  
3  
4  
5  
6  
7  
8  
9  
10  
11  
12  
13  
14  
15  
16  
17  
18  
19  
20  
21  
22  
23  
24  
25  
26  
27  
28  
29  
30  
31  
32  
33  
34  
35  
36  
37  
38  
39  
40  
41  
42  
43  
44  
45  
46

|                                          |                                       |                      |                                          |                                       |        |
|------------------------------------------|---------------------------------------|----------------------|------------------------------------------|---------------------------------------|--------|
| Dosage sensitive genes                   | Gen_level_Collins_rCNV_PLIgenes_PHI   | ~0                   | Dosage sensitive genes                   | Gen_level_Collins_rCNV_PLIgenes_PTS   | ~0     |
| DDG2P database                           | Gen_level_ddg2p_loss                  | ~0                   | DDG2P database                           | Gen_level_ddg2p_gain                  | 0.0690 |
| Cell essential and nonessential genes    | Gen_level_Essential_in_culture_CRISPR | 0.0001               | Cell essential and nonessential genes    | Gen_level_Essential_in_culture_CRISPR | ~0     |
|                                          | Gen_nonEssential_in_culture_CRISPR    | 0.3020               |                                          | Gen_nonEssential_in_culture_CRISPR    | 0.6100 |
| FDA proved drug target                   | Gen_level_FDA-approved_drug_targets   | 0.0013               | FDA proved drug target                   | Gen_level_FDA-approved_drug_targets   | ~0     |
| G protein-coupled receptor               | Gen_level_gpcr_union                  | 0.4010               | G protein-coupled receptor               | Gen_level_gpcr_union                  | 0.0003 |
| Neurodevelopmental process related genes | Gen_level_HP_0000707                  | ~0                   | Neurodevelopmental process related genes | Gen_level_HP_0000707                  | ~0     |
|                                          | Gen_level_HP_0000708                  | ~0                   |                                          | Gen_level_HP_0000708                  | ~0     |
|                                          | Gen_level_HP_0000717                  | 0.0008               |                                          | Gen_level_HP_0000717                  | 0.0032 |
|                                          | Gen_level_HP_0000729                  | ~0                   |                                          | Gen_level_HP_0000729                  | ~0     |
|                                          | Gen_level_HP_0000752                  | ~0                   |                                          | Gen_level_HP_0000752                  | ~0     |
|                                          | Gen_level_HP_0001197                  | ~0                   |                                          | Gen_level_HP_0001197                  | ~0     |
|                                          | Gen_level_HP_0001250                  | ~0                   |                                          | Gen_level_HP_0001250                  | ~0     |
|                                          | Gen_level_HP_0001507                  | ~0                   |                                          | Gen_level_HP_0001507                  | ~0     |
|                                          | Gen_level_HP_0002011                  | ~0                   |                                          | Gen_level_HP_0002011                  | ~0     |
| Gen_level_HP_0002715                     | ~0                                    | Gen_level_HP_0002715 | ~0                                       |                                       |        |

|                               |                                                          |        |                               |                                                          |        |
|-------------------------------|----------------------------------------------------------|--------|-------------------------------|----------------------------------------------------------|--------|
|                               | Gen_level_HP_0002960                                     | 0.7040 |                               | Gen_level_HP_0002960                                     | 0.3470 |
|                               | Gen_level_HP_0011446                                     | ~0     |                               | Gen_level_HP_0011446                                     | ~0     |
|                               | Gen_level_HP_0012443                                     | ~0     |                               | Gen_level_HP_0012443                                     | ~0     |
|                               | Gen_level_HP_0012638                                     | ~0     |                               | Gen_level_HP_0012638                                     | ~0     |
|                               | Gen_level_HP_0012639                                     | ~0     |                               | Gen_level_HP_0012639                                     | ~0     |
|                               | Gen_level_HP_0012759                                     | ~0     |                               | Gen_level_HP_0012759                                     | ~0     |
|                               | Gen_level_HP_0025031                                     | ~0     |                               | Gen_level_HP_0025031                                     | ~0     |
|                               | Gen_level_HP_0031466                                     | ~0     |                               | Gen_level_HP_0031466                                     | ~0     |
|                               | Gen_level_HP_0100022                                     | ~0     |                               | Gen_level_HP_0100022                                     | ~0     |
|                               | Gen_level_HP_0100753                                     | 0.1320 |                               | Gen_level_HP_0100753                                     | 0.8250 |
|                               | Gen_level_HP_0100852                                     | ~0     |                               | Gen_level_HP_0100852                                     | 0.0009 |
| Mouse heterozygous LoF lethal | Gen_level_mgi_essential_gene                             | ~0     | Mouse heterozygous LoF lethal | Gen_level_mgi_essential_gene                             | ~0     |
| Olfactory receptors           | Gen_level_Olfactory_receptors_mainland                   | 0.0066 | Olfactory receptors           | Gen_level_Olfactory_receptors_mainland                   | 0.6100 |
| Sfari gene                    | Gen_level_sfari_gene                                     | ~0     | Sfari gene                    | Gen_level_sfari_gene                                     | ~0     |
| <b>Sequence level</b>         | <i>The Seq_level_significant features are 7 out of 7</i> |        | <b>Sequence level</b>         | <i>The Seq_level_significant features are 6 out of 7</i> |        |
| Blacklisted regions           | Seq_level_DacMapExclude                                  | ~0     | Blacklisted regions           | Seq_level_DacMapExclude                                  | ~0     |
| Sfari gene                    | Seq_level_DukeMapExclude                                 | ~0     | Sfari gene                    | Seq_level_DukeMapExclude                                 | ~0     |
| GC content                    | Seq_level_GC                                             | ~0     | GC content                    | Seq_level_GC                                             | ~0     |
| Human                         | Seq_level_HAR                                            | 0.0085 | Human                         | Seq_level_HAR                                            | 0.2010 |

1  
2  
3  
4  
5  
6  
7  
8  
9  
10  
11  
12  
13  
14  
15  
16  
17  
18  
19  
20  
21  
22  
23  
24  
25  
26  
27  
28  
29  
30  
31  
32  
33  
34  
35  
36  
37  
38  
39  
40  
41  
42  
43  
44  
45  
46

|                                                                                      |                          |    |                                                                                      |                          |    |
|--------------------------------------------------------------------------------------|--------------------------|----|--------------------------------------------------------------------------------------|--------------------------|----|
| accelerated regions Heterochromatin positions                                        |                          |    | accelerated regions Heterochromatin positions                                        |                          |    |
| Human accelerated regions Heterochromatin positions Cross species conservation score | Seq_level_HetDomain      | ~0 | Human accelerated regions Heterochromatin positions Cross species conservation score | Seq_level_HetDomain      | ~0 |
|                                                                                      | Seq_level_phastCons46way | ~0 |                                                                                      | Seq_level_phastCons46way | ~0 |
| Human accelerated regions                                                            | Seq_level_phyloP46way    | ~0 | Human accelerated regions                                                            | Seq_level_phyloP46way    | ~0 |

p-values: when  $P < 1 \times 10^{-4}$ , it is shown as ~0, and when  $1 \times 10^{-4} < P < 1$ , it is shown as a decimal mode.

**Table S3.** Feature importancy. All the feature names were shown as feature names (original sources)\_tissue type (if applicable). p-values: when  $P < 1 \times 10^{-4}$ , it is shown as  $\sim 0$ , and when  $1 \times 10^{-4} < P < 1$ , it is shown as a decimal mode.  $P = 0.05$  is set as the significant level.

| Features in copy number loss model | Feature importancy | Features in copy number gain model | Feature importancy |
|------------------------------------|--------------------|------------------------------------|--------------------|
| 1_TssA_chromHMM_brain              | 0.0053             | 1_TssA_chromHMM_brain              | 0.0056             |
| 10_EnhA2_chromHMM_brain            | 0.0078             | 10_EnhA2_chromHMM_brain            | 0.0049             |
| 11_EnhWk_chromHMM_brain            | 0.0138             | 11_EnhWk_chromHMM_brain            | 0.0093             |
| 12_ZNF_chromHMM_brain              | 0.0046             | 12_ZNF_chromHMM_brain              | 0.0049             |
| 13_Het_chromHMM_brain              | 0.0058             | 13_Het_chromHMM_brain              | 0.0058             |
| 14_TssBiv_chromHMM_brain           | 0.0043             | 14_TssBiv_chromHMM_brain           | 0.0041             |
| 15_EnhBiv_chromHMM_brain           | 0.0057             | 15_EnhBiv_chromHMM_brain           | 0.0062             |
| 16_ReprPC_chromHMM_brain           | 0.0043             | 16_ReprPC_chromHMM_brain           | 0.0041             |
| 17_ReprPCWk_chromHMM_brain         | 0.0054             | 17_ReprPCWk_chromHMM_brain         | 0.0055             |
| 18_Quies_chromHMM_brain            | 0.0062             | 18_Quies_chromHMM_brain            | 0.0073             |
| 2_TssFlnk_chromHMM_brain           | 0.0045             | 2_TssFlnk_chromHMM_brain           | 0.0043             |
| 3_TssFlnkU_chromHMM_brain          | 0.0047             | 3_TssFlnkU_chromHMM_brain          | 0.0046             |
| 4_TssFlnkD_chromHMM_brain          | 0.0073             | 4_TssFlnkD_chromHMM_brain          | 0.0053             |
| 5_Tx_chromHMM_brain                | 0.0046             | 5_Tx_chromHMM_brain                | 0.0051             |
| 6_TxWk_chromHMM_brain              | 0.0050             | 6_TxWk_chromHMM_brain              | 0.0048             |
| 7_EnhG1_chromHMM_brain             | 0.0045             | 7_EnhG1_chromHMM_brain             | 0.0044             |
| 8_EnhG2_chromHMM_brain             | 0.0047             | 8_EnhG2_chromHMM_brain             | 0.0054             |
| 9_EnhA1_chromHMM_brain             | 0.0055             | 9_EnhA1_chromHMM_brain             | 0.0048             |
| ATAC-seq_observed_Brain            | 0.0058             | ATAC-seq_observed_Brain            | 0.0060             |
| Brain_Angular_Gyrus_dbSUPER        | 0.0042             | Brain_Angular_Gyrus_dbSUPER        | 0.0035             |
| Brain_Anterior_Caudate_dbSUPER     | 0.0043             | Brain_Anterior_Caudate_dbSUPER     | 0.0051             |
| Brain_Cingulate_Gyrus_dbSUPER      | 0.0040             | Brain_Cingulate_Gyrus_dbSUPER      | 0.0039             |



|                                               |        |                                              |        |
|-----------------------------------------------|--------|----------------------------------------------|--------|
| Brain_Hippocampus_Middle_150_dbSUPER          | 0.0045 | Brain_Hippocampus_Middle_150_dbSUPER         | 0.0063 |
| Brain_Hippocampus_Middle_dbSUPER              | 0.0039 | Brain_Hippocampus_Middle_dbSUPER             | 0.0042 |
| Brain_Inferior_Temporal_Lobe_dbSUPER          | 0.0035 | Brain_Inferior_Temporal_Lobe_dbSUPER         | 0.0054 |
| Brain_Mid_Frontal_Lobe_dbSUPER                | 0.0050 | Brain_Mid_Frontal_Lobe_dbSUPER               | 0.0070 |
| ClinGen_haploinsufficiency_gene_0             | 0.0037 | ClinGen_region_curation_Triplosensitivity_0  | 0.0022 |
| ClinGen_haploinsufficiency_gene_1             | 0.0059 | ClinGen_region_curation_Triplosensitivity_1  | 0.0071 |
| ClinGen_haploinsufficiency_gene_2             | ~0     | ClinGen_region_curation_Triplosensitivity_2  | 0.0061 |
| ClinGen_haploinsufficiency_gene_3             | 0.0094 | ClinGen_region_curation_Triplosensitivity_3  | 0.0054 |
| ClinGen_haploinsufficiency_gene_30            | 0.0048 | ClinGen_region_curation_Triplosensitivity_40 | 0.0101 |
| ClinGen_haploinsufficiency_gene_40            | 0.0011 | ClinGen_triplosensitivity_gene               | ~0     |
| ClinGen_region_curation_Haploinsufficiency_0  | 0.0046 | ClinGen_triplosensitivity_gene_0             | 0.0062 |
| ClinGen_region_curation_Haploinsufficiency_1  | ~0     | ClinGen_triplosensitivity_gene_1             | ~0     |
| ClinGen_region_curation_Haploinsufficiency_2  | 0.0026 | ClinGen_triplosensitivity_gene_2             | ~0     |
| ClinGen_region_curation_Haploinsufficiency_3  | 0.0048 | ClinGen_triplosensitivity_gene_3             | ~0     |
| ClinGen_region_curation_Haploinsufficiency_30 | ~0     | ClinGen_triplosensitivity_gene_30            | ~0     |
| ClinGen_region_curation_Haploinsufficiency_40 | 0.0105 | ClinGen_triplosensitivity_gene_40            | ~0     |
| Collins_rCNV_PLIgenes_PHI                     | 0.0524 | Collins_rCNV_PLIgenes_PTS                    | 0.0653 |
| ctcf                                          | 0.0053 | ctcf                                         | 0.0045 |
| CTCF_observed_Brain                           | 0.0043 | CTCF_observed_Brain                          | 0.0051 |
| DacMapExclude                                 | 0.0057 | DacMapExclude                                | 0.0089 |
| ddg2p_loss                                    | 0.0075 | ddg2p_gain                                   | 0.0035 |
| DNaseIClusterd                                | 0.0042 | DNaseIClusterd                               | 0.0045 |
| DnaseMaster                                   | 0.0055 | DnaseMaster                                  | 0.0050 |
| DNase-seq_observed_Brain                      | 0.0111 | DNase-seq_observed_Brain                     | 0.0108 |
| DNase-seq_observed_NeurospH                   | 0.0230 | DNase-seq_observed_NeurospH                  | 0.0224 |

|                             |        |                             |        |
|-----------------------------|--------|-----------------------------|--------|
| DukeMapExclude              | 0.0063 | DukeMapExclude              | 0.0085 |
| EncodeAwgTfbsBroadNhaCtcf   | 0.0051 | EncodeAwgTfbsBroadNhaCtcf   | 0.0048 |
| EncodeRegTfbsClustered      | 0.0049 | EncodeRegTfbsClustered      | 0.0056 |
| enhancerAtlas_Astrocyte_EP  | 0.0034 | enhancerAtlas_Astrocyte_EP  | 0.0068 |
| enhancerAtlas_Cerebellum_EP | 0.0042 | enhancerAtlas_Cerebellum_EP | 0.0049 |
| enhancerAtlas_ESC_neuron_EP | 0.0033 | enhancerAtlas_ESC_neuron_EP | 0.0045 |
| EP300_imputed_Brain         | 0.0048 | EP300_imputed_Brain         | 0.0040 |
| EP300_imputed_Neuropsph     | 0.0051 | EP300_imputed_Neuropsph     | 0.0055 |
| Essential_in_culture_CRISPR | 0.0039 | Essential_in_culture_CRISPR | 0.0051 |
| famton_astrocyte            | 0.0039 | famton_astrocyte            | 0.0070 |
| famton_brain                | 0.0067 | famton_brain                | 0.0053 |
| famton_CL:0000127           | 0.0035 | famton_CL:0000127           | 0.0038 |
| famton_count                | 0.0054 | famton_count                | 0.0062 |
| famton_neuronal_stem_cell   | 0.0046 | famton_neuronal_stem_cell   | 0.0032 |
| famton_permssive            | 0.0046 | famton_permssive            | 0.0050 |
| FDA-approved_drug_targets   | 0.0040 | FDA-approved_drug_targets   | 0.0046 |
| GC                          | 0.0065 | gain_activating_score1      | ~0     |
| gencode_CDS                 | 0.0092 | gain_activating_score2      | ~0     |
| gencode_exon                | 0.0077 | gain_activating_score3      | 0.0018 |
| gencode_gene                | 0.0074 | GC                          | 0.0059 |
| gencode_Selenocysteine      | ~0     | gencode_CDS                 | 0.0096 |
| gencode_start_codon         | 0.0208 | gencode_exon                | 0.0211 |
| gencode_stop_codon          | 0.0035 | gencode_gene                | 0.0072 |
| gencode_transcript          | 0.0047 | gencode_Selenocysteine      | 0.0005 |
| gencode_UTR                 | 0.0058 | gencode_start_codon         | 0.0086 |

1  
2  
3  
4  
5  
6  
7  
8  
9  
10  
11  
12  
13  
14  
15  
16  
17  
18  
19  
20  
21  
22  
23  
24  
25  
26  
27  
28  
29  
30  
31  
32  
33  
34  
35  
36  
37  
38  
39  
40  
41  
42  
43  
44  
45  
46

|                                        |        |                                        |        |
|----------------------------------------|--------|----------------------------------------|--------|
| gene_enhancer_links_brain_enhcenter    | 0.0056 | gencode_stop_codon                     | 0.0043 |
| gene_enhancer_links_neurosph_enhcenter | 0.0064 | gencode_transcript                     | 0.0051 |
| gpcr_union                             | 0.0040 | gencode_UTR                            | 0.0043 |
| H2AFZ_imputed_Brain                    | 0.0043 | gene_enhancer_links_brain_enhcenter    | 0.0043 |
| H2AFZ_imputed_Neurosph                 | 0.0047 | gene_enhancer_links_neurosph_enhcenter | 0.0061 |
| H2AFZ_observed_Brain                   | 0.0052 | gpcr_union                             | 0.0035 |
| H3k27ac                                | 0.0049 | H2AFZ_imputed_Brain                    | 0.0045 |
| H3K27ac_imputed_Brain                  | 0.0046 | H2AFZ_imputed_Neurosph                 | 0.0060 |
| H3K27ac_imputed_Neurosph               | 0.0051 | H2AFZ_observed_Brain                   | 0.0056 |
| H3K27ac_observed_Brain                 | 0.0045 | H3k27ac                                | 0.0054 |
| H3K27ac_observed_Neurosph              | 0.0058 | H3K27ac_imputed_Brain                  | 0.0063 |
| H3K27me3_imputed_Brain                 | 0.0050 | H3K27ac_imputed_Neurosph               | 0.0066 |
| H3K27me3_imputed_Neurosph              | 0.0065 | H3K27ac_observed_Brain                 | 0.0047 |
| H3K27me3_observed_Brain                | 0.0067 | H3K27ac_observed_Neurosph              | 0.0062 |
| H3k4me1                                | 0.0061 | H3K27me3_imputed_Brain                 | 0.0051 |
| H3K4me1_imputed_Brain                  | 0.0041 | H3K27me3_imputed_Neurosph              | 0.0064 |
| H3K4me1_imputed_Neurosph               | 0.0053 | H3K27me3_observed_Brain                | 0.0077 |
| H3K4me1_observed_Brain                 | 0.0056 | H3k4me1                                | 0.0072 |
| H3K4me1_observed_Neurosph              | 0.0043 | H3K4me1_imputed_Brain                  | 0.0057 |
| H3K4me2_observed_Brain                 | 0.0052 | H3K4me1_imputed_Neurosph               | 0.0060 |
| H3k4me3                                | 0.0077 | H3K4me1_observed_Brain                 | 0.0058 |
| H3K4me3_imputed_Brain                  | 0.0061 | H3K4me1_observed_Neurosph              | 0.0053 |
| H3K4me3_imputed_Neurosph               | 0.0051 | H3K4me2_observed_Brain                 | 0.0053 |
| H3K4me3_observed_Brain                 | 0.0054 | H3k4me3                                | 0.0053 |
| H3K4me3_observed_Neurosph              | 0.0054 | H3K4me3_imputed_Brain                  | 0.0053 |

|                            |        |                            |        |
|----------------------------|--------|----------------------------|--------|
| H3K9ac_imputed_Brain       | 0.0055 | H3K4me3_imputed_Neuropsph  | 0.0041 |
| H3K9ac_imputed_Neuropsph   | 0.0055 | H3K4me3_observed_Brain     | 0.0068 |
| H3K9me3_imputed_Brain      | 0.0057 | H3K4me3_observed_Neuropsph | 0.0065 |
| H3K9me3_imputed_Neuropsph  | 0.0059 | H3K9ac_imputed_Brain       | 0.0050 |
| H3K9me3_observed_Brain     | 0.0055 | H3K9ac_imputed_Neuropsph   | 0.0069 |
| H3K9me3_observed_Neuropsph | 0.0047 | H3K9me3_imputed_Brain      | 0.0068 |
| H4K20me1_imputed_Neuropsph | 0.0044 | H3K9me3_imputed_Neuropsph  | 0.0066 |
| H4K20me1_observed_Brain    | 0.0050 | H3K9me3_observed_Brain     | 0.0066 |
| hacer_T1                   | 0.0051 | H3K9me3_observed_Neuropsph | 0.0079 |
| HAR                        | 0.0044 | H4K20me1_imputed_Neuropsph | 0.0055 |
| HetDomain                  | 0.0113 | H4K20me1_observed_Brain    | 0.0054 |
| HP_0000707                 | 0.0034 | hacer_T1                   | 0.0063 |
| HP_0000708                 | 0.0047 | HAR                        | 0.0053 |
| HP_0000717                 | 0.0092 | HetDomain                  | 0.0069 |
| HP_0000729                 | 0.0031 | HP_0000707                 | 0.0041 |
| HP_0000752                 | 0.0032 | HP_0000708                 | 0.0046 |
| HP_0001197                 | 0.0047 | HP_0000717                 | 0.0045 |
| HP_0001250                 | 0.0038 | HP_0000729                 | 0.0053 |
| HP_0001507                 | 0.0042 | HP_0000752                 | 0.0056 |
| HP_0002011                 | 0.0056 | HP_0001197                 | 0.0045 |
| HP_0002715                 | 0.0077 | HP_0001250                 | 0.0026 |
| HP_0002960                 | 0.0090 | HP_0001507                 | 0.0058 |
| HP_0011446                 | 0.0053 | HP_0002011                 | 0.0043 |
| HP_0012443                 | 0.0068 | HP_0002715                 | 0.0045 |
| HP_0012638                 | 0.0034 | HP_0002960                 | 0.0040 |

1  
2  
3  
4  
5  
6  
7  
8  
9  
10  
11  
12  
13  
14  
15  
16  
17  
18  
19  
20  
21  
22  
23  
24  
25  
26  
27  
28  
29  
30  
31  
32  
33  
34  
35  
36  
37  
38  
39  
40  
41  
42  
43  
44  
45  
46

|                                |        |                                |        |
|--------------------------------|--------|--------------------------------|--------|
| HP_0012639                     | 0.0051 | HP_0011446                     | 0.0063 |
| HP_0012759                     | 0.0074 | HP_0012443                     | 0.0028 |
| HP_0025031                     | 0.0045 | HP_0012638                     | 0.0045 |
| HP_0031466                     | 0.0055 | HP_0012639                     | 0.0029 |
| HP_0100022                     | 0.0065 | HP_0012759                     | 0.0058 |
| HP_0100753                     | ~0     | HP_0025031                     | 0.0079 |
| HP_0100852                     | 0.0043 | HP_0031466                     | 0.0058 |
| liu_csbj_targetgene            | 0.0052 | HP_0100022                     | 0.0035 |
| loss_of_function_score1        | 0.0059 | HP_0100753                     | 0.0046 |
| loss_of_function_score2        | 0.0033 | HP_0100852                     | 0.0052 |
| loss_of_function_score3        | 0.0055 | liu_csbj_targetgene            | 0.0050 |
| methMCRF                       | 0.0065 | methMCRF                       | 0.0075 |
| mgi_essential_gene             | 0.0044 | mgi_essential_gene             | 0.0139 |
| miRNA                          | 0.0049 | miRNA                          | 0.0053 |
| non-codingRNAs                 | 0.0058 | non-codingRNAs                 | 0.0049 |
| nonEssential_in_culture_CRISPR | 0.0047 | nonEssential_in_culture_CRISPR | 0.0043 |
| nott_Astrocyte_enhancers       | 0.0040 | nott_Astrocyte_enhancers       | 0.0051 |
| nott_Astrocyte_promoters       | 0.0045 | nott_Astrocyte_promoters       | 0.0063 |
| nott_H3K4me3_around_TSS        | 0.0060 | nott_H3K4me3_around_TSS        | 0.0056 |
| nott_Microglia_enhancers       | 0.0047 | nott_Microglia_enhancers       | 0.0051 |
| nott_Microglia_promoters       | 0.0057 | nott_Microglia_promoters       | 0.0052 |
| nott_Neuronal_enhancers        | 0.0123 | nott_Neuronal_enhancers        | 0.0109 |
| nott_Neuronal_promoters        | 0.0047 | nott_Neuronal_promoters        | 0.0054 |
| nott_Oligo_enhancers           | 0.0049 | nott_Oligo_enhancers           | 0.0058 |
| nott_Oligo_promoters           | 0.0061 | nott_Oligo_promoters           | 0.0048 |

|                               |        |                               |        |
|-------------------------------|--------|-------------------------------|--------|
| nott_superEnhancer            | ~0     | nott_superEnhancer            | ~0     |
| Olfactory_receptors_mainland  | 0.0068 | Olfactory_receptors_mainland  | 0.0025 |
| phastCons46way                | 0.0062 | phastCons46way                | 0.0070 |
| phyloP46way                   | 0.0051 | phyloP46way                   | 0.0057 |
| POLR2A_imputed_Neurosph       | 0.0067 | POLR2A_imputed_Neurosph       | 0.0043 |
| PsychENCODE_CBC_H3K27ac       | 0.0067 | PsychENCODE_CBC_H3K27ac       | 0.0049 |
| PsychENCODE_HiC_EP            | 0.0050 | PsychENCODE_HiC_EP            | 0.0046 |
| PsychENCODE_loops_interRegion | 0.0043 | PsychENCODE_loops_interRegion | 0.0043 |
| PsychENCODE_PEC_Enhancers     | 0.0104 | PsychENCODE_PEC_Enhancers     | 0.0079 |
| PsychENCODE_PFC_H3K27ac       | 0.0062 | PsychENCODE_PFC_H3K27ac       | 0.0047 |
| PsychENCODE_TAR               | 0.0058 | PsychENCODE_TAR               | 0.0052 |
| PsychENCODE_TC_H3K27ac        | 0.0047 | PsychENCODE_TC_H3K27ac        | 0.0047 |
| RAD21_imputed_Brain           | 0.0055 | RAD21_imputed_Brain           | 0.0061 |
| RAD21_imputed_Neurosph        | 0.0057 | RAD21_imputed_Neurosph        | 0.0060 |
| RoadmapDNasePromCount         | 0.0048 | RoadmapDNasePromCount         | 0.0049 |
| SE_ele                        | 0.0043 | SE_ele                        | 0.0052 |
| SEA00101                      | 0.0046 | SEA00101                      | 0.0056 |
| sfari_gene                    | 0.0046 | sfari_gene                    | 0.0043 |
| SMC3_imputed_Brain            | 0.0060 | SMC3_imputed_Brain            | 0.0054 |
| SMC3_imputed_Neurosph         | 0.0047 | SMC3_imputed_Neurosph         | 0.0069 |
| snp_selex                     | 0.0084 | snp_selex                     | 0.0045 |
| TAD56                         | 0.0079 | TAD56                         | 0.0072 |
| tss2000bp                     | 0.0178 | tss2000bp                     | 0.0146 |
| vista                         | 0.0047 | vista                         | 0.0045 |
| yue_loops_hippo               | 0.0051 | yue_loops_hippo               | 0.0066 |

## References

1. Hart T, Tong AHY, Chan K, et al. Evaluation and Design of Genome-Wide CRISPR/SpCas9 Knockout Screens. *G3 (Bethesda)* 2017;7:2719-27. doi: 10.1534/g3.117.041277
2. Karczewski KJ, Francioli LC, Tiao G, et al. The mutational constraint spectrum quantified from variation in 141,456 humans. *Nature* 2020;581:434-43. doi: 10.1038/s41586-020-2308-7
3. Strande NT, Riggs ER, Buchanan AH, et al. Evaluating the Clinical Validity of Gene-Disease Associations: An Evidence-Based Framework Developed by the Clinical Genome Resource. *Am J Hum Genet* 2017;100:895-906. doi: 10.1016/j.ajhg.2017.04.015
4. Wright CF, Fitzgerald TW, Jones WD, et al. Genetic diagnosis of developmental disorders in the DDD study: a scalable analysis of genome-wide research data. *Lancet* 2015;385:1305-14. doi: 10.1016/S0140-6736(14)61705-0
5. Collins RL, Glessner JT, Porcu E, et al. A cross-disorder dosage sensitivity map of the human genome. *Cell* 2022;185:3041-3055.e25. doi: 10.1101/2021.01.26.21250098
6. Wishart DS, Feunang YD, Guo AC, et al. DrugBank 5.0: a major update to the DrugBank database for 2018. *Nucleic Acids Res* 2018;46:D1074-D82. doi: 10.1093/nar/gkx1037
7. Motenko H, Neuhauser SB, O'Keefe M, et al. MouseMine: a new data warehouse for MGI. *Mamm Genome* 2015;26:325-30. doi: 10.1007/s00335-015-9573-z
8. Kohler S, Gargano M, Matentzoglou N, et al. The Human Phenotype Ontology in 2021. *Nucleic Acids Res* 2021;49:D1207-D17. doi: 10.1093/nar/gkaa1043
9. Braschi B, Denny P, Gray K, et al. Genenames.org: the HGNC and VGNC resources in 2019. *Nucleic Acids Res* 2019;47:D786-D92. doi: 10.1093/nar/gky930
10. Abrahams BS, Arking DE, Campbell DB, et al. SFARI Gene 2.0: a community-driven knowledgebase for the autism spectrum disorders (ASDs). *Mol Autism* 2013;4:36. doi: 10.1186/2040-2392-4-36
11. Ernst J, Kellis M. ChromHMM: automating chromatin-state discovery and characterization. *Nat Methods* 2012;9:215-6. doi: 10.1038/nmeth.1906
12. Boix CA, James BT, Park YP, et al. Regulatory genomic circuitry of human disease loci by integrative epigenomics. *Nature* 2021;590:300-07. doi: 10.1038/s41586-020-03145-z
13. Sabo PJ, Hawrylycz M, Wallace JC, et al. Discovery of functional noncoding elements by digital analysis of chromatin structure. *Proc Natl Acad Sci U.S.A.* 2004;101:16837-42. doi: 10.1073/pnas.0407387101
14. Davis CA, Hitz BC, Sloan CA, et al. The Encyclopedia of DNA elements (ENCODE): data portal update. *Nucleic Acids Res* 2018;46:D794-D801. doi: 10.1093/nar/gkx1081

- 1  
2  
3  
4  
5 15. Roadmap Epigenomics C, Kundaje A, Meuleman W, et al. Integrative analysis of 111 reference human epigenomes. *Nature* 2015;518:317-30. doi:  
6 10.1038/nature14248  
7  
8 16. Nott A, Holtman IR, Coufal NG, et al. Brain cell type-specific enhancer-promoter interactome maps and disease-risk association. *Science* 2019;366:1134-39. doi:  
9 10.1126/science.aay0793  
10  
11 17. Khan A, Zhang X. dbSUPER: a database of super-enhancers in mouse and human genome. *Nucleic Acids Res* 2016;44:D164-71. doi: 10.1093/nar/gkv1002  
12  
13 18. Gao T, Qian J. EnhancerAtlas 2.0: an updated resource with enhancer annotation in 586 tissue/cell types across nine species. *Nucleic Acids Res* 2020;48:D58-D64.  
14 doi: 10.1093/nar/gkz980  
15  
16 19. Andersson R, Gebhard C, Miguel-Escalada I, et al. An atlas of active enhancers across human cell types and tissues. *Nature* 2014;507:455-61. doi:  
17 10.1038/nature12787  
18  
19 20. Wang J, Dai X, Berry LD, et al. HACER: an atlas of human active enhancers to interpret regulatory variants. *Nucleic Acids Res* 2019;47:D106-D12. doi:  
20 10.1093/nar/gky864  
21  
22 21. Wang D, Liu S, Warrell J, et al. Comprehensive functional genomic resource and integrative model for the human brain. *Science* 2018;362:eaat8464. doi:  
23 10.1126/science.aat8464  
24  
25 22. Jiang Y, Qian F, Bai X, et al. SEdb: a comprehensive human super-enhancer database. *Nucleic Acids Res* 2019;47:D235-D43. doi: 10.1093/nar/gky1025  
26  
27 23. Chen C, Zhou D, Gu Y, et al. SEA version 3.0: a comprehensive extension and update of the Super-Enhancer archive. *Nucleic Acids Res* 2020;48:D198-D203. doi:  
28 10.1093/nar/gkz1028  
29  
30 24. Visel A, Minovitsky S, Dubchak I, et al. VISTA Enhancer Browser--a database of tissue-specific human enhancers. *Nucleic Acids Res* 2007;35:D88-92. doi:  
31 10.1093/nar/gkl822  
32  
33 25. Harrow J, Frankish A, Gonzalez JM, et al. GENCODE: the reference human genome annotation for The ENCODE Project. *Genome Res* 2012;22:1760-74. doi:  
34 10.1101/gr.135350.111  
35  
36 26. Liu X, Xu W, Leng F, et al. Prioritizing long range interactions in noncoding regions using GWAS and deletions perturbed TADs. *Comput Struct Biotechnol J*  
37 2020;18:2945-52. doi: 10.1016/j.csbj.2020.10.014  
38  
39 27. Wang Y, Song F, Zhang B, et al. The 3D Genome Browser: a web-based browser for visualizing 3D genome organization and long-range chromatin interactions.  
40 *Genome Biol* 2018;19:151. doi: 10.1186/s13059-018-1519-9  
41  
42 28. Yan J, Qiu Y, Ribeiro Dos Santos AM, et al. Systematic analysis of binding of transcription factors to noncoding variants. *Nature* 2021;591:147-51. doi:  
43 10.1038/s41586-021-03211-0  
44  
45  
46



- 1  
2  
3  
4  
5 29. Karolchik D, Hinrichs AS, Furey TS, et al. The UCSC Table Browser data retrieval tool. *Nucleic Acids Res* 2004;32:D493-6. doi: 10.1093/nar/gkh103  
6 30. Ho JW, Jung YL, Liu T, et al. Comparative analysis of metazoan chromatin organization. *Nature* 2014;512:449-52. doi: 10.1038/nature13415  
7 31. Doan RN, Bae BI, Cubelos B, et al. Mutations in Human Accelerated Regions Disrupt Cognition and Social Behavior. *Cell* 2016;167:341-54 e12. doi:  
8 10.1016/j.cell.2016.08.071  
9 32. Harding SD, Sharman JL, Faccenda E, et al. The IUPHAR/BPS Guide to PHARMACOLOGY in 2018: updates and expansion to encompass the new guide to  
10 IMMUNOPHARMACOLOGY. *Nucleic Acids Res* 2018;46:D1091-D106. doi: 10.1093/nar/gkx1121  
11 33. Alexander SP, Christopoulos A, Davenport AP, et al. THE CONCISE GUIDE TO PHARMACOLOGY 2017/18: G protein-coupled receptors. *Br J Pharmacol*  
12 2017;174 Suppl 1:S17-S129. doi: 10.1111/bph.13878  
13 34. Collins RL, Glessner JT, Porcu E, et al. A cross-disorder dosage sensitivity map of the human genome. *Cell* 2022;185:3041-55.e25. doi: 10.1016/j.cell.2022.06.036  
14 35. UniProt Consortium T. UniProt: the universal protein knowledgebase. *Nucleic Acids Res* 2018;46:2699. doi: 10.1093/nar/gky092  
15 36. Howe KL, Achuthan P, Allen J, et al. Ensembl 2021. *Nucleic Acids Res* 2021;49:D884-D91. doi: 10.1093/nar/gkaa942  
16  
17  
18  
19  
20  
21  
22  
23  
24  
25  
26  
27  
28  
29  
30  
31  
32  
33  
34  
35  
36  
37  
38  
39  
40  
41  
42  
43  
44  
45  
46
