# Supplementary material for: NeuroCNVscore: a tissue-specific framework to prioritise the pathogenicity of CNVs in neurodevelopmental disorders
Source: PubMed Central journal article supplement — BMJ Paediatr Open. 2023 Jul 5;7(1):e001966. doi: 10.1136/bmjpo-2023-001966 (PMC10335557; doi:10.1136/bmjpo-2023-001966), 2023-07-05
Supplement: bmjpo-2023-001966supp001.pdf [file bmjpo-2023-001966supp001.pdf]

## Supplementary Tables

**Table S1.** A detailed feature description. This table includes all features used in our model. These features are grouped into three levels: gene, functional/genomic segment and sequence. A brief description along with references is described on each feature.

| Feature category    | Feature set                               | Description                                                                                                                                                                                                                         | Feature type | References |
|---------------------|-------------------------------------------|-------------------------------------------------------------------------------------------------------------------------------------------------------------------------------------------------------------------------------------|--------------|------------|
| Gene level (N = 61) | Cell essential and nonessential genes     | CRISPR/Cas9 screens identified essential genes in human cell lines. Curated in <sup>2</sup>                                                                                                                                         | discrete     | 1          |
|                     | ClinGen curated genes and genomic regions | Genes and genomics regions were rated from 0 to 3, indicating an increased evidence on dosage sensitivity. Additional two levels (40,30) suggest unlikely dosage sensitive and genes associated with autosomal recessive phenotype. | discrete     | 3          |
|                     | DDG2P database                            | A curated list of genes linked to developmental disorders compiled by clinicians as part of the DDD study to facilitate clinical feedback on likely causal variants                                                                 | discrete     | 4          |
|                     | Dosage sensitive genes                    | Predicted score on dosage sensitive genes (i.e., haploinsufficiency or triplosensitivity)                                                                                                                                           | discrete     | 5, 34      |
|                     | FDA proved drug target                    | Genes with protein products that are mechanistic targets of FDA-approved drugs. Curated in <sup>2</sup>                                                                                                                             | discrete     | 6          |
|                     | G protein-coupled receptor                | GPCR list curated in <sup>2</sup>                                                                                                                                                                                                   | discrete     | 32, 33, 35 |
|                     | Mouse heterozygous LoF lethal             | Genes that are lethal in mouse models when inactivated heterozygous. Curated by <sup>2</sup>                                                                                                                                        | discrete     | 7          |
|                     | Neurodevelopmental process related genes  | Genes associated with various phenotypes from HPO: Abnormality of the nervous system (HP:0000707)-associated genes<br>Abnormality of nervous system physiology (HP:0012638)-associated                                              | discrete     | 8          |

|  |                     |                                                                                                                                                                                                                                                                                                                                                                                                                                                                                                                                                                                                                                                                                                                                                                                                                                                                                                                                                                                                                                                                                                                                                                                                                                                                                               |          |               |
|--|---------------------|-----------------------------------------------------------------------------------------------------------------------------------------------------------------------------------------------------------------------------------------------------------------------------------------------------------------------------------------------------------------------------------------------------------------------------------------------------------------------------------------------------------------------------------------------------------------------------------------------------------------------------------------------------------------------------------------------------------------------------------------------------------------------------------------------------------------------------------------------------------------------------------------------------------------------------------------------------------------------------------------------------------------------------------------------------------------------------------------------------------------------------------------------------------------------------------------------------------------------------------------------------------------------------------------------|----------|---------------|
|  |                     | <p>genes</p> <p>Behavioral abnormality (HP:0000708)-associated genes</p> <p>Abnormality of nervous system morphology (HP:0012639)-associated genes</p> <p>Abnormality of the immune system (HP:0002715)-associated genes</p> <p>Neurodevelopmental abnormality (HP:0012759)-associated genes</p> <p>Autoimmunity (HP:0002960)-associated genes</p> <p>Morphological abnormality of the central nervous system (HP:0002011)-associated genes</p> <p>Schizophrenia (HP:0100753)-associated genes</p> <p>Autistic behavior (HP:0000729)-associated genes</p> <p>Abnormality of movement (HP:0100022)-associated genes</p> <p>Seizures (HP:0001250)-associated genes</p> <p>Autism (HP:0000717)-associated genes</p> <p>Hyperactivity (HP:0000752)-associated genes</p> <p>Abnormality of prenatal development or birth (HP:0001197)-associated genes</p> <p>Impairment in personality functioning (HP:0031466)-associated genes</p> <p>Abnormality of the digestive system (HP:0025031)-associated genes</p> <p>Growth abnormality (HP:0001507)-associated genes</p> <p>Abnormal fear/anxiety-related behavior (HP:0100852)-associated genes</p> <p>Abnormality of brain morphology (HP:0012443)-associated genes</p> <p>Abnormality of higher mental function (HP:0011446)-associated genes</p> |          |               |
|  | Olfactory receptors | Any HUGO-recognized family of olfactory receptor genes                                                                                                                                                                                                                                                                                                                                                                                                                                                                                                                                                                                                                                                                                                                                                                                                                                                                                                                                                                                                                                                                                                                                                                                                                                        | discrete | <sup>9</sup>  |
|  | SFARI gene          | Genes implicated in autism susceptibility                                                                                                                                                                                                                                                                                                                                                                                                                                                                                                                                                                                                                                                                                                                                                                                                                                                                                                                                                                                                                                                                                                                                                                                                                                                     | discrete | <sup>10</sup> |

|                                                                                                                                   |                            |                                                                                                                                                          |            |    |
|-----------------------------------------------------------------------------------------------------------------------------------|----------------------------|----------------------------------------------------------------------------------------------------------------------------------------------------------|------------|----|
| Functional/genomic segment level (N = 121)                                                                                        | Chromatin states           | Brain related chromatin states inferred by the extended 18-way ChromHMM model across 98 tissues from the Roadmap Epigenomics Project                     | discrete   | 11 |
|                                                                                                                                   | CTCF binding sites         | Genome wide observed CTCF binding sites from Brain                                                                                                       | continuous | 12 |
|                                                                                                                                   |                            | Genome wide CTCF binding sites from 7 cell lines generated by ChIP-seq. Curated by UCSC                                                                  | continuous | 13 |
|                                                                                                                                   | DNA Accessibility          | ATAC-seq from brain and neurosph.                                                                                                                        | continuous | 13 |
|                                                                                                                                   | DNase hypersensitive sites | Observed DNase I hypersensitive areas from brain and neurosph.                                                                                           | continuous | 13 |
|                                                                                                                                   |                            | DNase hypersensitive sites assayed from a collection of cell types. Download from UCSC table browser NAR 2004                                            | continuous | 14 |
|                                                                                                                                   |                            | RoadmapDNasePromCount                                                                                                                                    | discrete   | 15 |
|                                                                                                                                   | Enhancers                  | Brain cell type-specific enhancers identified by PLAC-seq                                                                                                | discrete   | 16 |
|                                                                                                                                   |                            | dbSUPER: Super enhancers from Brain Angular Gyrus; Brain Anterior Caudate; Brain Cingulate Gyrus; Brain Hippocampus Middle; Brain Inferior Temporal Lobe | discrete   | 17 |
|                                                                                                                                   |                            | EpiMap: enhancers from the brain and neurosph.                                                                                                           | discrete   | 12 |
|                                                                                                                                   |                            | EnhancerAtlas 2.0: Enhancer predictions in 197 human cell lines & tissues                                                                                | discrete   | 18 |
|                                                                                                                                   |                            | FANTOM Enhancers: Enhancer predictions for human tissues and cell types from the FANTOM5 consortium                                                      | discrete   | 19 |
|                                                                                                                                   |                            | HACER: Active enhancer predictions in human cell lines & tissues based on PRO-seq, GRO-seq, or CAGE data                                                 | discrete   | 20 |
| PsychENCODE: PEC EnhancersDER-03a_hg19_PEC_enhancers_clean.bed                                                                    |                            | discrete                                                                                                                                                 | 21         |    |
| SEA: Super enhancer predictions from 143 human cell lines and tissues (mapped back to hg19 using liftOver with minimum 75% match) |                            | discrete                                                                                                                                                 | 23         |    |

|  |                                                                                     |                                                                                                                                                                                                |            |    |
|--|-------------------------------------------------------------------------------------|------------------------------------------------------------------------------------------------------------------------------------------------------------------------------------------------|------------|----|
|  |                                                                                     | Sedb: Super enhancer and typical enhancer predictions from 541 human cell lines and tissues                                                                                                    | discrete   | 22 |
|  |                                                                                     | VISTA: Experimentally-validated mammalian enhancers                                                                                                                                            | discrete   | 24 |
|  | Genomic segmentations                                                               | All autosomal, protein-coding genes; CDS; exon; Selenocysteine; start_codon; stop_codon; transcript UTR                                                                                        | discrete   | 25 |
|  | Histone markers                                                                     | H2AFZ, H2AK5ac, H2AK9ac, H2BK120ac, H2BK12ac, H2BK15ac, H2BK20ac, H2BK5ac, H3F3A, H3K27ac, H3K4ac, H3K4me1, H3K4me2, H3K4me3, H3K9ac, H3K9me1, H3K9me2, H3K9me3 from the brain or neurosph     | continuous | 12 |
|  |                                                                                     | H3K27ac peaks for the Prefrontal Cortex, the Temporal Cortex, and the Cerebellar Cortex                                                                                                        | continuous | 21 |
|  | Long range probable genes                                                           | Target genes by prediction on GWAS hits and 3D chromatin structures                                                                                                                            | discrete   | 26 |
|  | Loop anchors and topological associated domains in higher-order chromatin structure | TAD boundaries (defined as the start and end coordinates for each TAD $\pm$ 5kb) from 30 samples meeting our ENCODE data inclusion criteria available for download from the ENCODE Data Portal | continuous | 14 |
|  |                                                                                     | Selected "derived" datasets from PsychENCODE Integrated Analysis Package, including cortex enhancers, transcriptionally active regions, TAD boundaries, and H3k27ac peaks                      | continuous | 21 |
|  |                                                                                     | Yue labs                                                                                                                                                                                       | continuous | 27 |
|  | Methylation                                                                         | MeDIP/MRE (mCRF) methylation calls                                                                                                                                                             | continuous | 15 |
|  | Transcript active regions                                                           | Cortex Transcriptionally Active Regions are found within at least 70% of the individuals                                                                                                       | continuous | 21 |
|  | Transcript factor binding sites                                                     | SNP-SELEX                                                                                                                                                                                      | discrete   | 28 |
|  | Transcript starting sites                                                           | The 2000bp flanking regions about transcript starting sites                                                                                                                                    | discrete   | 36 |

|                        |                                  |                                                                                                                                                                    |            |               |
|------------------------|----------------------------------|--------------------------------------------------------------------------------------------------------------------------------------------------------------------|------------|---------------|
| Sequence level (N = 7) | Blacklisted regions              | Genome regions have anomalous, unstructured, high signal/read counts (DacMapExclude), problematic regions for short sequence tag signal detection (DukeMapExclude) | discrete   | <sup>29</sup> |
|                        | Cross species conservation score | The conservation scoring (phylop46way, phastcon46way) for multiple alignments of 45 vertebrate genomes to the human genome                                         | continuous | <sup>29</sup> |
|                        | GC content                       | GC content calculated with a "span" size of 5 bases                                                                                                                | continuous | <sup>29</sup> |
|                        | Heterochromatin positions        | It is calculated based on H3K9me3 enrichment regions                                                                                                               | discrete   | <sup>30</sup> |
|                        | Human accelerated regions        | Human accelerated regions are conserved genomic loci with elevated divergence in humans                                                                            | discrete   | <sup>31</sup> |

**Table S2.** Individual feature comparisons. This table compares all of the features used in the copy number loss and copy number gain models. The comparisons were made using the two-tailed Wilcoxon rank-sum test, with a significant cut off of  $P = 0.05$ . All the feature names were reformatted as followed: feature type (Fun\_level/Gen\_level/Seq\_level)\_feature names(original sources)\_tissue type (if applicable). Fun: Function; Gen: Gene; Seq: Sequence.

| Source                                                         | Features in copy number loss model                      | P value | Source                                                         | Features in copy number gain model                      | P value |
|----------------------------------------------------------------|---------------------------------------------------------|---------|----------------------------------------------------------------|---------------------------------------------------------|---------|
| <b>Functional/<br/>genomic<br/>segment<br/>level</b>           | <i>Fun_level_significant features are 80 out of 120</i> |         | <b>Functional/<br/>genomic<br/>segment<br/>level</b>           | <i>Fun_level_significant features are 75 out of 120</i> |         |
| Chromatin<br>states from<br>Roadmap<br>Epigenomic<br>s Project | Fun_level_1_TssA_chromHMM_brain                         | ~0      | Chromatin<br>states from<br>Roadmap<br>Epigenomic<br>s Project | Fun_level_1_TssA_chromHMM_brain                         | ~0      |
|                                                                | Fun_level_10_EnhA2_chromHMM_brain                       | ~0      |                                                                | Fun_level_10_EnhA2_chromHMM_brain                       | ~0      |
|                                                                | Fun_level_11_EnhWk_chromHMM_brain                       | ~0      |                                                                | Fun_level_11_EnhWk_chromHMM_brain                       | ~0      |
|                                                                | Fun_level_12_ZNF_chromHMM_brain                         | ~0      |                                                                | Fun_level_12_ZNF_chromHMM_brain                         | 0.0003  |
|                                                                | Fun_level_13_Het_chromHMM_brain                         | ~0      |                                                                | Fun_level_13_Het_chromHMM_brain                         | ~0      |
|                                                                | Fun_level_14_TssBiv_chromHMM_brain                      | 0.1050  |                                                                | Fun_level_14_TssBiv_chromHMM_brain                      | ~0      |
|                                                                | Fun_level_15_EnhBiv_chromHMM_brain                      | ~0      |                                                                | Fun_level_15_EnhBiv_chromHMM_brain                      | ~0      |
|                                                                | Fun_level_16_ReprPC_chromHMM_brain                      | ~0      |                                                                | Fun_level_16_ReprPC_chromHMM_brain                      | 0.9910  |
|                                                                | Fun_level_17_ReprPCWk_chromHMM_brain                    | 0.0498  |                                                                | Fun_level_17_ReprPCWk_chromHMM_brain                    | ~0      |
|                                                                | Fun_level_18_Quies_chromHMM_brain                       | ~0      |                                                                | Fun_level_18_Quies_chromHMM_brain                       | ~0      |
|                                                                | Fun_level_2_TssFlnk_chromHMM_brain                      | ~0      |                                                                | Fun_level_2_TssFlnk_chromHMM_brain                      | ~0      |
|                                                                | Fun_level_3_TssFlnkU_chromHMM_brain                     | ~0      |                                                                | Fun_level_3_TssFlnkU_chromHMM_brain                     | ~0      |
|                                                                | Fun_level_4_TssFlnkD_chromHMM_brain                     | ~0      |                                                                | Fun_level_4_TssFlnkD_chromHMM_brain                     | ~0      |
|                                                                | Fun_level_5_Tx_chromHMM_brain                           | ~0      |                                                                | Fun_level_5_Tx_chromHMM_brain                           | ~0      |
|                                                                | Fun_level_6_TxWk_chromHMM_brain                         | ~0      |                                                                | Fun_level_6_TxWk_chromHMM_brain                         | ~0      |
|                                                                | Fun_level_7_EnhG1_chromHMM_brain                        | ~0      |                                                                | Fun_level_7_EnhG1_chromHMM_brain                        | ~0      |

|           |                                                  |        |           |                                                  |        |
|-----------|--------------------------------------------------|--------|-----------|--------------------------------------------------|--------|
|           | Fun_level_8_EnhG2_chromHMM_brain                 | ~0     |           | Fun_level_8_EnhG2_chromHMM_brain                 | ~0     |
|           | Fun_level_9_EnhA1_chromHMM_brain                 | ~0     |           | Fun_level_9_EnhA1_chromHMM_brain                 | ~0     |
| Enhancers | Fun_level_dbsuper_Brain_Angular_Gyrus            | ~0     | Enhancers | Fun_level_dbsuper_Brain_Angular_Gyrus            | ~0     |
|           | Fun_level_dbsuper_Brain_Anterior_Caudate         | ~0     |           | Fun_level_dbsuper_Brain_Anterior_Caudate         | ~0     |
|           | Fun_level_dbsuper_Brain_Cingulate_Gyrus          | ~0     |           | Fun_level_dbsuper_Brain_Cingulate_Gyrus          | ~0     |
|           | Fun_level_dbsuper_Brain_Hippocampus_Middle_150   | ~0     |           | Fun_level_dbsuper_Brain_Hippocampus_Middle_150   | ~0     |
|           | Fun_level_dbsuper_Brain_Hippocampus_Middle       | ~0     |           | Fun_level_dbsuper_Brain_Hippocampus_Middle       | ~0     |
|           | Fun_level_dbsuper_Brain_Inferior_Temporal_Lobe   | ~0     |           | Fun_level_dbsuper_Brain_Inferior_Temporal_Lobe   | ~0     |
|           | Fun_level_dbsuper_Brain_Mid_Frontal_Lobe         | 0.0293 |           | Fun_level_dbsuper_Brain_Mid_Frontal_Lobe         | 0.0266 |
|           | Fun_level_famton_astrocyte                       | 0.0004 |           | Fun_level_famton_astrocyte                       | 0.0230 |
|           | Fun_level_famton_brain                           | 0.4890 |           | Fun_level_famton_brain                           | 0.6620 |
|           | Fun_level_famton_CL:0000127                      | 0.0001 |           | Fun_level_famton_CL:0000127                      | ~0     |
|           | Fun_level_famton_count                           | ~0     |           | Fun_level_famton_count                           | ~0     |
|           | Fun_level_famton_neuronal_stem_cell              | 0.3280 |           | Fun_level_famton_neuronal_stem_cell              | 0.6990 |
|           | Fun_level_famton_permssive                       | ~0     |           | Fun_level_famton_permssive                       | ~0     |
|           | Fun_level_enhancerAtlas_Astrocyte_EP             | ~0     |           | Fun_level_enhancerAtlas_Astrocyte_EP             | ~0     |
|           | Fun_level_enhancerAtlas_Cerebellum_EP            | ~0     |           | Fun_level_enhancerAtlas_Cerebellum_EP            | ~0     |
|           | Fun_level_enhancerAtlas_ESC_neuron_EP            | ~0     |           | Fun_level_enhancerAtlas_ESC_neuron_EP            | ~0     |
|           | Fun_level_gene_enhancer_links_brain_enhcenter    | ~0     |           | Fun_level_gene_enhancer_links_brain_enhcenter    | ~0     |
|           | Fun_level_gene_enhancer_links_neurosph_enhcenter | ~0     |           | Fun_level_gene_enhancer_links_neurosph_enhcenter | ~0     |
|           | Fun_level_hacer_T1                               | ~0     |           | Fun_level_hacer_T1                               | ~0     |
|           | Fun_level_SE_ele                                 | ~0     |           | Fun_level_SE_ele                                 | ~0     |

|                                    |                                      |        |                                    |                                      |        |
|------------------------------------|--------------------------------------|--------|------------------------------------|--------------------------------------|--------|
|                                    | Fun_level_SEA00101                   | ~0     |                                    | Fun_level_SEA00101                   | ~0     |
|                                    | Fun_level_nott_Astrocyte_enhancers   | ~0     |                                    | Fun_level_nott_Astrocyte_enhancers   | ~0     |
|                                    | Fun_level_nott_Astrocyte_promoters   | ~0     |                                    | Fun_level_nott_Astrocyte_promoters   | ~0     |
|                                    | Fun_level_nott_H3K4me3_around_TSS    | ~0     |                                    | Fun_level_nott_H3K4me3_around_TSS    | ~0     |
|                                    | Fun_level_nott_Microglia_enhancers   | ~0     |                                    | Fun_level_nott_Microglia_enhancers   | ~0     |
|                                    | Fun_level_nott_Microglia_promoters   | ~0     |                                    | Fun_level_nott_Microglia_promoters   | ~0     |
|                                    | Fun_level_nott_Neuronal_enhancers    | ~0     |                                    | Fun_level_nott_Neuronal_enhancers    | ~0     |
|                                    | Fun_level_nott_Neuronal_promoters    | ~0     |                                    | Fun_level_nott_Neuronal_promoters    | ~0     |
|                                    | Fun_level_nott_Oligo_enhancers       | ~0     |                                    | Fun_level_nott_Oligo_enhancers       | ~0     |
|                                    | Fun_level_nott_Oligo_promoters       | ~0     |                                    | Fun_level_nott_Oligo_promoters       | ~0     |
|                                    | Fun_level_nott_superEnhancer         | 1      |                                    | Fun_level_nott_superEnhancer         | 1      |
|                                    | Fun_level_vista                      | ~0     |                                    | Fun_level_vista                      | ~0     |
| CTCF binding sites                 | Fun_level_ctcf                       | ~0     | CTCF binding sites                 | Fun_level_ctcf                       | ~0     |
|                                    | Fun_level_CTCF_observed_Brain        | ~0     |                                    | Fun_level_CTCF_observed_Brain        | ~0     |
| DNase hypersensitive sites         | Fun_level_DNaseClusterd              | ~0     | DNase hypersensitive sites         | Fun_level_DNaseClusterd              | ~0     |
|                                    | Fun_level_DnaseMaster                | ~0     |                                    | Fun_level_DnaseMaster                | ~0     |
|                                    | Fun_level_DNase-seq_observed_Brain   | ~0     |                                    | Fun_level_DNase-seq_observed_Brain   | ~0     |
|                                    | Fun_level_DNase-seq_observed_Neurosp | ~0     |                                    | Fun_level_DNase-seq_observed_Neurosp | ~0     |
| Genomic segmentations from Gencode | Fun_level_EncodeAvgTfbsBroadNhaCtcf  | ~0     | Genomic segmentations from Gencode | Fun_level_EncodeAvgTfbsBroadNhaCtcf  | ~0     |
|                                    | Fun_level_EncodeRegTfbsClustered     | ~0     |                                    | Fun_level_EncodeRegTfbsClustered     | ~0     |
|                                    | Fun_level_gencode_CDS                | ~0     |                                    | Fun_level_gencode_CDS                | ~0     |
|                                    | Fun_level_gencode_exon               | 0.5440 |                                    | Fun_level_gencode_exon               | ~0     |
|                                    | Fun_level_gencode_gene               | ~0     |                                    | Fun_level_gencode_gene               | ~0     |
|                                    | Fun_level_gencode_Selenocysteine     | 0.5450 |                                    | Fun_level_gencode_Selenocysteine     | 0.6280 |
|                                    | Fun_level_gencode_start_codon        | 0.2450 |                                    | Fun_level_gencode_start_codon        | ~0     |

|                 |                                     |        |                 |                                     |        |
|-----------------|-------------------------------------|--------|-----------------|-------------------------------------|--------|
|                 | Fun_level_gencode_stop_codon        | ~0     |                 | Fun_level_gencode_stop_codon        | ~0     |
|                 | Fun_level_gencode_transcript        | 0.8590 |                 | Fun_level_gencode_transcript        | 0.8330 |
|                 | Fun_level_gencode_UTR               | ~0     |                 | Fun_level_gencode_UTR               | ~0     |
|                 | Fun_level_miRNA                     | ~0     |                 | Fun_level_miRNA                     | ~0     |
|                 | Fun_level_non-codingRNAs            | ~0     |                 | Fun_level_non-codingRNAs            | 0.0010 |
| Histone markers | Fun_level_ATAC-seq_observed_Brain   | ~0     | Histone markers | Fun_level_ATAC-seq_observed_Brain   | ~0     |
|                 | Fun_level_H2AFZ_imputed_Brain       | ~0     |                 | Fun_level_H2AFZ_imputed_Brain       | ~0     |
|                 | Fun_level_EP300_imputed_Brain       | ~0     |                 | Fun_level_EP300_imputed_Brain       | ~0     |
|                 | Fun_level_EP300_imputed_Neurosph    | ~0     |                 | Fun_level_EP300_imputed_Neurosph    | ~0     |
|                 | Fun_level_H2AFZ_imputed_Neurosph    | ~0     |                 | Fun_level_H2AFZ_imputed_Neurosph    | ~0     |
|                 | Fun_level_H2AFZ_observed_Brain      | ~0     |                 | Fun_level_H2AFZ_observed_Brain      | ~0     |
|                 | Fun_level_H3k27ac                   | ~0     |                 | Fun_level_H3k27ac                   | ~0     |
|                 | Fun_level_H3K27ac_imputed_Brain     | ~0     |                 | Fun_level_H3K27ac_imputed_Brain     | ~0     |
|                 | Fun_level_H3K27ac_imputed_Neurosph  | ~0     |                 | Fun_level_H3K27ac_imputed_Neurosph  | ~0     |
|                 | Fun_level_H3K27ac_observed_Brain    | ~0     |                 | Fun_level_H3K27ac_observed_Brain    | ~0     |
|                 | Fun_level_H3K27ac_observed_Neurosph | ~0     |                 | Fun_level_H3K27ac_observed_Neurosph | ~0     |
|                 | Fun_level_H3K27me3_imputed_Brain    | ~0     |                 | Fun_level_H3K27me3_imputed_Brain    | ~0     |
|                 | Fun_level_H3K27me3_imputed_Neurosph | ~0     |                 | Fun_level_H3K27me3_imputed_Neurosph | ~0     |
|                 | Fun_level_H3K27me3_observed_Brain   | ~0     |                 | Fun_level_H3K27me3_observed_Brain   | ~0     |
|                 | Fun_level_H3k4me1                   | ~0     |                 | Fun_level_H3k4me1                   | ~0     |
|                 | Fun_level_H3K4me1_imputed_Brain     | ~0     |                 | Fun_level_H3K4me1_imputed_Brain     | ~0     |
|                 | Fun_level_H3K4me1_imputed_Neurosph  | ~0     |                 | Fun_level_H3K4me1_imputed_Neurosph  | ~0     |
|                 | Fun_level_H3K4me1_observed_Brain    | ~0     |                 | Fun_level_H3K4me1_observed_Brain    | ~0     |
|                 | Fun_level_H3K4me1_observed_Neurosph | ~0     |                 | Fun_level_H3K4me1_observed_Neurosph | ~0     |
|                 | Fun_level_H3K4me2_observed_Brain    | ~0     |                 | Fun_level_H3K4me2_observed_Brain    | ~0     |

|                              |                                         |        |                              |                                         |        |
|------------------------------|-----------------------------------------|--------|------------------------------|-----------------------------------------|--------|
|                              | Fun_level_H3k4me3                       | ~0     |                              | Fun_level_H3k4me3                       | ~0     |
|                              | Fun_level_H3K4me3_imputed_Brain         | 0.0580 |                              | Fun_level_H3K4me3_imputed_Brain         | 0.4680 |
|                              | Fun_level_H3K4me3_imputed_Neurosph      | ~0     |                              | Fun_level_H3K4me3_imputed_Neurosph      | ~0     |
|                              | Fun_level_H3K4me3_observed_Brain        | 0.0592 |                              | Fun_level_H3K4me3_observed_Brain        | 0.4710 |
|                              | Fun_level_H3K4me3_observed_Neurosph     | ~0     |                              | Fun_level_H3K4me3_observed_Neurosph     | ~0     |
|                              | Fun_level_H3K9ac_imputed_Brain          | ~0     |                              | Fun_level_H3K9ac_imputed_Brain          | ~0     |
|                              | Fun_level_H3K9ac_imputed_Neurosph       | ~0     |                              | Fun_level_H3K9ac_imputed_Neurosph       | ~0     |
|                              | Fun_level_H3K9me3_imputed_Brain         | ~0     |                              | Fun_level_H3K9me3_imputed_Brain         | ~0     |
|                              | Fun_level_H3K9me3_imputed_Neurosph      | ~0     |                              | Fun_level_H3K9me3_imputed_Neurosph      | ~0     |
|                              | Fun_level_H3K9me3_observed_Brain        | ~0     |                              | Fun_level_H3K9me3_observed_Brain        | ~0     |
|                              | Fun_level_H3K9me3_observed_Neurosph     | ~0     |                              | Fun_level_H3K9me3_observed_Neurosph     | ~0     |
|                              | Fun_level_H4K20me1_imputed_Neurosph     | ~0     |                              | Fun_level_H4K20me1_imputed_Neurosph     | ~0     |
|                              | Fun_level_H4K20me1_observed_Brain       | ~0     |                              | Fun_level_H4K20me1_observed_Brain       | ~0     |
|                              | Fun_level_POLR2A_imputed_Neurosph       | ~0     |                              | Fun_level_POLR2A_imputed_Neurosph       | ~0     |
|                              | Fun_level_RAD21_imputed_Brain           | ~0     |                              | Fun_level_RAD21_imputed_Brain           | ~0     |
|                              | Fun_level_RAD21_imputed_Neurosph        | ~0     |                              | Fun_level_RAD21_imputed_Neurosph        | ~0     |
|                              | Fun_level_SMC3_imputed_Brain            | ~0     |                              | Fun_level_SMC3_imputed_Brain            | ~0     |
|                              | Fun_level_SMC3_imputed_Neurosph         | ~0     |                              | Fun_level_SMC3_imputed_Neurosph         | ~0     |
| Long range probable genes    | Fun_level_liu_csbj_targetgene           | ~0     | Long range probable genes    | Fun_level_liu_csbj_targetgene           | ~0     |
| Methylation                  | Fun_level_methMCRF                      | ~0     | Methylation                  | Fun_level_methMCRF                      | ~0     |
| Loop anchors and topological | Fun_level_PsychENCODE_CBC_H3K27ac       | ~0     | Loop anchors and topological | Fun_level_PsychENCODE_CBC_H3K27ac       | ~0     |
|                              | Fun_level_PsychENCODE_HiC_EP            | ~0     |                              | Fun_level_PsychENCODE_HiC_EP            | ~0     |
|                              | Fun_level_PsychENCODE_loops_interRegion | ~0     |                              | Fun_level_PsychENCODE_loops_interRegion | 0.1890 |

|                                                        |                                             |                                                            |                                                        |                                                       |        |                                                            |  |
|--------------------------------------------------------|---------------------------------------------|------------------------------------------------------------|--------------------------------------------------------|-------------------------------------------------------|--------|------------------------------------------------------------|--|
| associated domains in higher-order chromatin structure | Fun_level_PsychENCODE_PEC_Enhancers         | ~0                                                         | associated domains in higher-order chromatin structure | Fun_level_PsychENCODE_PEC_Enhancers                   | ~0     |                                                            |  |
|                                                        | Fun_level_PsychENCODE_PFC_H3K27ac           | ~0                                                         |                                                        | Fun_level_PsychENCODE_PFC_H3K27ac                     | ~0     |                                                            |  |
|                                                        | Fun_level_PsychENCODE_TAR                   | ~0                                                         |                                                        | Fun_level_PsychENCODE_TAR                             | ~0     |                                                            |  |
|                                                        | Fun_level_PsychENCODE_TC_H3K27ac            | ~0                                                         |                                                        | Fun_level_PsychENCODE_TC_H3K27ac                      | ~0     |                                                            |  |
|                                                        | Fun_level_TAD56                             | ~0                                                         |                                                        | Fun_level_TAD56                                       | ~0     |                                                            |  |
| DNase hypersensitive sites                             | Fun_level_RoadmapDNasePromCount             | ~0                                                         | DNase hypersensitive sites                             | Fun_level_RoadmapDNasePromCount                       | ~0     |                                                            |  |
| Transcript factor binding sites from snp-selex         | Fun_level_snp_selex                         | 0.0860                                                     | Transcript factor binding sites from snp-selex         | Fun_level_snp_selex                                   | 0.0403 |                                                            |  |
| Transcript starting sites                              | Fun_level_tss2000bp                         | ~0                                                         | Transcript starting sites                              | Fun_level_tss2000bp                                   | 0.1450 |                                                            |  |
| Higher-order chromatin structure from Yue lab          | Fun_level_yue_loops_hippo                   | ~0                                                         | Higher-order chromatin structure from Yue lab          | Fun_level_yue_loops_hippo                             | ~0     |                                                            |  |
| <b>Gene level</b>                                      |                                             | <i>The Gen_level_significant features are 34 out of 45</i> |                                                        | <b>Gene level</b>                                     |        | <i>The Gen_level_significant features are 25 out of 45</i> |  |
| ClinGen curated                                        | Gen_level_ClinGen_haploinsufficiency_gene_0 | 0.0013                                                     | ClinGen curated                                        | Gen_level_ClinGen_region_curation_Triplosensitivity_0 | 0.4450 |                                                            |  |

|                           |                                                         |        |                           |                                                        |        |
|---------------------------|---------------------------------------------------------|--------|---------------------------|--------------------------------------------------------|--------|
| genes and genomic regions | Gen_level_ClinGen_haploinsufficiency_gene_1             | 0.0086 | genes and genomic regions | Gen_level_ClinGen_region_curation_Triplosensitivity_1  | 0.4030 |
|                           | Gen_level_ClinGen_haploinsufficiency_gene_2             | 0.5950 |                           | Gen_level_ClinGen_region_curation_Triplosensitivity_2  | 0.0603 |
|                           | Gen_level_ClinGen_haploinsufficiency_gene_3             | ~0     |                           | Gen_level_ClinGen_region_curation_Triplosensitivity_3  | 0.3880 |
|                           | Gen_level_ClinGen_haploinsufficiency_gene_30            | ~0     |                           | Gen_level_ClinGen_region_curation_Triplosensitivity_40 | ~0     |
|                           | Gen_level_ClinGen_haploinsufficiency_gene_40            | 0.7010 |                           | Gen_level_ClinGen_triplosensitivity_gene               | 0.7800 |
|                           | Gen_level_ClinGen_region_curation_Haploinsufficiency_0  | 0.8020 |                           | Gen_level_ClinGen_triplosensitivity_gene_0             | ~0     |
|                           | Gen_level_ClinGen_region_curation_Haploinsufficiency_1  | 0.8830 |                           | Gen_level_ClinGen_triplosensitivity_gene_1             | 0.9070 |
|                           | Gen_level_ClinGen_region_curation_Haploinsufficiency_2  | 0.8130 |                           | Gen_level_ClinGen_triplosensitivity_gene_2             | 0.9410 |
|                           | Gen_level_ClinGen_region_curation_Haploinsufficiency_3  | 0.0011 |                           | Gen_level_ClinGen_triplosensitivity_gene_3             | 1.0000 |
|                           | Gen_level_ClinGen_region_curation_Haploinsufficiency_30 | 0.9290 |                           | Gen_level_ClinGen_triplosensitivity_gene_30            | 1.0000 |
|                           | Gen_level_ClinGen_region_curation_Haploinsufficiency_40 | ~0     |                           | Gen_level_ClinGen_triplosensitivity_gene_40            | 1.0000 |
|                           | Gen_level_loss_of_function_score1                       | 0.0026 |                           | Gen_level_gain_activating_score1                       | 0.8030 |
|                           | Gen_level_loss_of_function_score2                       | ~0     |                           | Gen_level_gain_activating_score2                       | 0.6810 |
|                           | Gen_level_loss_of_function_score3                       | ~0     |                           | Gen_level_gain_activating_score3                       | 0.2840 |

|                                          |                                       |                      |                                          |                                       |        |
|------------------------------------------|---------------------------------------|----------------------|------------------------------------------|---------------------------------------|--------|
| Dosage sensitive genes                   | Gen_level_Collins_rCNV_PLIgenes_PHI   | ~0                   | Dosage sensitive genes                   | Gen_level_Collins_rCNV_PLIgenes PTS   | ~0     |
| DDG2P database                           | Gen_level_ddg2p_loss                  | ~0                   | DDG2P database                           | Gen_level_ddg2p_gain                  | 0.0690 |
| Cell essential and nonessential genes    | Gen_level_Essential_in_culture_CRISPR | 0.0001               | Cell essential and nonessential genes    | Gen_level_Essential_in_culture_CRISPR | ~0     |
|                                          | Gen_nonEssential_in_culture_CRISPR    | 0.3020               |                                          | Gen_nonEssential_in_culture_CRISPR    | 0.6100 |
| FDA proved drug target                   | Gen_level_FDA-approved_drug_targets   | 0.0013               | FDA proved drug target                   | Gen_level_FDA-approved_drug_targets   | ~0     |
| G protein-coupled receptor               | Gen_level_gpcr_union                  | 0.4010               | G protein-coupled receptor               | Gen_level_gpcr_union                  | 0.0003 |
| Neurodevelopmental process related genes | Gen_level_HP_0000707                  | ~0                   | Neurodevelopmental process related genes | Gen_level_HP_0000707                  | ~0     |
|                                          | Gen_level_HP_0000708                  | ~0                   |                                          | Gen_level_HP_0000708                  | ~0     |
|                                          | Gen_level_HP_0000717                  | 0.0008               |                                          | Gen_level_HP_0000717                  | 0.0032 |
|                                          | Gen_level_HP_0000729                  | ~0                   |                                          | Gen_level_HP_0000729                  | ~0     |
|                                          | Gen_level_HP_0000752                  | ~0                   |                                          | Gen_level_HP_0000752                  | ~0     |
|                                          | Gen_level_HP_0001197                  | ~0                   |                                          | Gen_level_HP_0001197                  | ~0     |
|                                          | Gen_level_HP_0001250                  | ~0                   |                                          | Gen_level_HP_0001250                  | ~0     |
|                                          | Gen_level_HP_0001507                  | ~0                   |                                          | Gen_level_HP_0001507                  | ~0     |
|                                          | Gen_level_HP_0002011                  | ~0                   |                                          | Gen_level_HP_0002011                  | ~0     |
| Gen_level_HP_0002715                     | ~0                                    | Gen_level_HP_0002715 | ~0                                       |                                       |        |

|                               |                                                          |        |                               |                                                          |        |
|-------------------------------|----------------------------------------------------------|--------|-------------------------------|----------------------------------------------------------|--------|
|                               | Gen_level_HP_0002960                                     | 0.7040 |                               | Gen_level_HP_0002960                                     | 0.3470 |
|                               | Gen_level_HP_0011446                                     | ~0     |                               | Gen_level_HP_0011446                                     | ~0     |
|                               | Gen_level_HP_0012443                                     | ~0     |                               | Gen_level_HP_0012443                                     | ~0     |
|                               | Gen_level_HP_0012638                                     | ~0     |                               | Gen_level_HP_0012638                                     | ~0     |
|                               | Gen_level_HP_0012639                                     | ~0     |                               | Gen_level_HP_0012639                                     | ~0     |
|                               | Gen_level_HP_0012759                                     | ~0     |                               | Gen_level_HP_0012759                                     | ~0     |
|                               | Gen_level_HP_0025031                                     | ~0     |                               | Gen_level_HP_0025031                                     | ~0     |
|                               | Gen_level_HP_0031466                                     | ~0     |                               | Gen_level_HP_0031466                                     | ~0     |
|                               | Gen_level_HP_0100022                                     | ~0     |                               | Gen_level_HP_0100022                                     | ~0     |
|                               | Gen_level_HP_0100753                                     | 0.1320 |                               | Gen_level_HP_0100753                                     | 0.8250 |
|                               | Gen_level_HP_0100852                                     | ~0     |                               | Gen_level_HP_0100852                                     | 0.0009 |
| Mouse heterozygous LoF lethal | Gen_level_mgi_essential_gene                             | ~0     | Mouse heterozygous LoF lethal | Gen_level_mgi_essential_gene                             | ~0     |
| Olfactory receptors           | Gen_level_Olfactory_receptors_mainland                   | 0.0066 | Olfactory receptors           | Gen_level_Olfactory_receptors_mainland                   | 0.6100 |
| Sfari gene                    | Gen_level_sfari_gene                                     | ~0     | Sfari gene                    | Gen_level_sfari_gene                                     | ~0     |
| <b>Sequence level</b>         | <i>The Seq_level_significant features are 7 out of 7</i> |        | <b>Sequence level</b>         | <i>The Seq_level_significant features are 6 out of 7</i> |        |
| Blacklisted regions           | Seq_level_DacMapExclude                                  | ~0     | Blacklisted regions           | Seq_level_DacMapExclude                                  | ~0     |
| Sfari gene                    | Seq_level_DukeMapExclude                                 | ~0     | Sfari gene                    | Seq_level_DukeMapExclude                                 | ~0     |
| GC content                    | Seq_level_GC                                             | ~0     | GC content                    | Seq_level_GC                                             | ~0     |
| Human                         | Seq_level_HAR                                            | 0.0085 | Human                         | Seq_level_HAR                                            | 0.2010 |

|                                                                                            |                                                 |    |                                                                                            |                                                 |    |
|--------------------------------------------------------------------------------------------|-------------------------------------------------|----|--------------------------------------------------------------------------------------------|-------------------------------------------------|----|
| accelerated regions<br>Heterochromatin positions                                           |                                                 |    | accelerated regions<br>Heterochromatin positions                                           |                                                 |    |
| Human accelerated regions<br>Heterochromatin positions<br>Cross species conservation score | Seq_level_HetDomain<br>Seq_level_phastCons46way | ~0 | Human accelerated regions<br>Heterochromatin positions<br>Cross species conservation score | Seq_level_HetDomain<br>Seq_level_phastCons46way | ~0 |
| Human accelerated regions                                                                  | Seq_level_phyloP46way                           | ~0 | Human accelerated regions                                                                  | Seq_level_phyloP46way                           | ~0 |

p-values: when  $P < 1 \times 10^{-4}$ , it is shown as ~0, and when  $1 \times 10^{-4} < P < 1$ , it is shown as a decimal mode.

**Table S3.** Feature importancy. All the feature names were shown as feature names (original sources)\_tissue type (if applicable). p-values: when  $P < 1 \times 10^{-4}$ , it is shown as ~0, and when  $1 \times 10^{-4} < P < 1$ , it is shown as a decimal mode.  $P = 0.05$  is set as the significant level.

| Features in copy number loss model | Feature importancy | Features in copy number gain model | Feature importancy |
|------------------------------------|--------------------|------------------------------------|--------------------|
| 1_TssA_chromHMM_brain              | 0.0053             | 1_TssA_chromHMM_brain              | 0.0056             |
| 10_EnhA2_chromHMM_brain            | 0.0078             | 10_EnhA2_chromHMM_brain            | 0.0049             |
| 11_EnhWk_chromHMM_brain            | 0.0138             | 11_EnhWk_chromHMM_brain            | 0.0093             |
| 12_ZNF_chromHMM_brain              | 0.0046             | 12_ZNF_chromHMM_brain              | 0.0049             |
| 13_Het_chromHMM_brain              | 0.0058             | 13_Het_chromHMM_brain              | 0.0058             |
| 14_TssBiv_chromHMM_brain           | 0.0043             | 14_TssBiv_chromHMM_brain           | 0.0041             |
| 15_EnhBiv_chromHMM_brain           | 0.0057             | 15_EnhBiv_chromHMM_brain           | 0.0062             |
| 16_ReprPC_chromHMM_brain           | 0.0043             | 16_ReprPC_chromHMM_brain           | 0.0041             |
| 17_ReprPCWk_chromHMM_brain         | 0.0054             | 17_ReprPCWk_chromHMM_brain         | 0.0055             |
| 18_Quies_chromHMM_brain            | 0.0062             | 18_Quies_chromHMM_brain            | 0.0073             |
| 2_TssFlnk_chromHMM_brain           | 0.0045             | 2_TssFlnk_chromHMM_brain           | 0.0043             |
| 3_TssFlnkU_chromHMM_brain          | 0.0047             | 3_TssFlnkU_chromHMM_brain          | 0.0046             |
| 4_TssFlnkD_chromHMM_brain          | 0.0073             | 4_TssFlnkD_chromHMM_brain          | 0.0053             |
| 5_Tx_chromHMM_brain                | 0.0046             | 5_Tx_chromHMM_brain                | 0.0051             |
| 6_TxWk_chromHMM_brain              | 0.0050             | 6_TxWk_chromHMM_brain              | 0.0048             |
| 7_EnhG1_chromHMM_brain             | 0.0045             | 7_EnhG1_chromHMM_brain             | 0.0044             |
| 8_EnhG2_chromHMM_brain             | 0.0047             | 8_EnhG2_chromHMM_brain             | 0.0054             |
| 9_EnhA1_chromHMM_brain             | 0.0055             | 9_EnhA1_chromHMM_brain             | 0.0048             |
| ATAC-seq_observed_Brain            | 0.0058             | ATAC-seq_observed_Brain            | 0.0060             |
| Brain_Angular_Gyrus_dbSUPER        | 0.0042             | Brain_Angular_Gyrus_dbSUPER        | 0.0035             |
| Brain_Anterior_Caudate_dbSUPER     | 0.0043             | Brain_Anterior_Caudate_dbSUPER     | 0.0051             |
| Brain_Cingulate_Gyrus_dbSUPER      | 0.0040             | Brain_Cingulate_Gyrus_dbSUPER      | 0.0039             |

|                                               |        |                                              |        |
|-----------------------------------------------|--------|----------------------------------------------|--------|
| Brain_Hippocampus_Middle_150_dbsuper          | 0.0045 | Brain_Hippocampus_Middle_150_dbsuper         | 0.0063 |
| Brain_Hippocampus_Middle_dbsuper              | 0.0039 | Brain_Hippocampus_Middle_dbsuper             | 0.0042 |
| Brain_Inferior_Temporal_Lobe_dbsuper          | 0.0035 | Brain_Inferior_Temporal_Lobe_dbsuper         | 0.0054 |
| Brain_Mid_Frontal_Lobe_dbsuper                | 0.0050 | Brain_Mid_Frontal_Lobe_dbsuper               | 0.0070 |
| ClinGen_haploinsufficiency_gene_0             | 0.0037 | ClinGen_region_curation_Triplosensitivity_0  | 0.0022 |
| ClinGen_haploinsufficiency_gene_1             | 0.0059 | ClinGen_region_curation_Triplosensitivity_1  | 0.0071 |
| ClinGen_haploinsufficiency_gene_2             | ~0     | ClinGen_region_curation_Triplosensitivity_2  | 0.0061 |
| ClinGen_haploinsufficiency_gene_3             | 0.0094 | ClinGen_region_curation_Triplosensitivity_3  | 0.0054 |
| ClinGen_haploinsufficiency_gene_30            | 0.0048 | ClinGen_region_curation_Triplosensitivity_40 | 0.0101 |
| ClinGen_haploinsufficiency_gene_40            | 0.0011 | ClinGen_triplosensitivity_gene               | ~0     |
| ClinGen_region_curation_Haploinsufficiency_0  | 0.0046 | ClinGen_triplosensitivity_gene_0             | 0.0062 |
| ClinGen_region_curation_Haploinsufficiency_1  | ~0     | ClinGen_triplosensitivity_gene_1             | ~0     |
| ClinGen_region_curation_Haploinsufficiency_2  | 0.0026 | ClinGen_triplosensitivity_gene_2             | ~0     |
| ClinGen_region_curation_Haploinsufficiency_3  | 0.0048 | ClinGen_triplosensitivity_gene_3             | ~0     |
| ClinGen_region_curation_Haploinsufficiency_30 | ~0     | ClinGen_triplosensitivity_gene_30            | ~0     |
| ClinGen_region_curation_Haploinsufficiency_40 | 0.0105 | ClinGen_triplosensitivity_gene_40            | ~0     |
| Collins_rCNV_PLIgenes_PHI                     | 0.0524 | Collins_rCNV_PLIgenes PTS                    | 0.0653 |
| ctcf                                          | 0.0053 | ctcf                                         | 0.0045 |
| CTCF_observed_Brain                           | 0.0043 | CTCF_observed_Brain                          | 0.0051 |
| DacMapExclude                                 | 0.0057 | DacMapExclude                                | 0.0089 |
| ddg2p_loss                                    | 0.0075 | ddg2p_gain                                   | 0.0035 |
| DNaseIClusterd                                | 0.0042 | DNaseIClusterd                               | 0.0045 |
| DnaseMaster                                   | 0.0055 | DnaseMaster                                  | 0.0050 |
| DNase-seq_observed_Brain                      | 0.0111 | DNase-seq_observed_Brain                     | 0.0108 |
| DNase-seq_observed_Neurosph                   | 0.0230 | DNase-seq_observed_Neurosph                  | 0.0224 |

|                             |        |                             |        |
|-----------------------------|--------|-----------------------------|--------|
| DukeMapExclude              | 0.0063 | DukeMapExclude              | 0.0085 |
| EncodeAvgTfbsBroadNhaCtcf   | 0.0051 | EncodeAvgTfbsBroadNhaCtcf   | 0.0048 |
| EncodeRegTfbsClustered      | 0.0049 | EncodeRegTfbsClustered      | 0.0056 |
| enhancerAtlas_Astrocyte_EP  | 0.0034 | enhancerAtlas_Astrocyte_EP  | 0.0068 |
| enhancerAtlas_Cerebellum_EP | 0.0042 | enhancerAtlas_Cerebellum_EP | 0.0049 |
| enhancerAtlas_ESC_neuron_EP | 0.0033 | enhancerAtlas_ESC_neuron_EP | 0.0045 |
| EP300_imputed_Brain         | 0.0048 | EP300_imputed_Brain         | 0.0040 |
| EP300_imputed_NeurospH      | 0.0051 | EP300_imputed_NeurospH      | 0.0055 |
| Essential_in_culture_CRISPR | 0.0039 | Essential_in_culture_CRISPR | 0.0051 |
| famton_astrocyte            | 0.0039 | famton_astrocyte            | 0.0070 |
| famton_brain                | 0.0067 | famton_brain                | 0.0053 |
| famton_CL:0000127           | 0.0035 | famton_CL:0000127           | 0.0038 |
| famton_count                | 0.0054 | famton_count                | 0.0062 |
| famton_neuronal_stem_cell   | 0.0046 | famton_neuronal_stem_cell   | 0.0032 |
| famton_permssive            | 0.0046 | famton_permssive            | 0.0050 |
| FDA-approved_drug_targets   | 0.0040 | FDA-approved_drug_targets   | 0.0046 |
| GC                          | 0.0065 | gain_activating_score1      | ~0     |
| gencode_CDS                 | 0.0092 | gain_activating_score2      | ~0     |
| gencode_exon                | 0.0077 | gain_activating_score3      | 0.0018 |
| gencode_gene                | 0.0074 | GC                          | 0.0059 |
| gencode_Selenocysteine      | ~0     | gencode_CDS                 | 0.0096 |
| gencode_start_codon         | 0.0208 | gencode_exon                | 0.0211 |
| gencode_stop_codon          | 0.0035 | gencode_gene                | 0.0072 |
| gencode_transcript          | 0.0047 | gencode_Selenocysteine      | 0.0005 |
| gencode_UTR                 | 0.0058 | gencode_start_codon         | 0.0086 |

|                                        |        |                                        |        |
|----------------------------------------|--------|----------------------------------------|--------|
| gene_enhancer_links_brain_enhcenter    | 0.0056 | gencode_stop_codon                     | 0.0043 |
| gene_enhancer_links_neurosph_enhcenter | 0.0064 | gencode_transcript                     | 0.0051 |
| gpcr_union                             | 0.0040 | gencode_UTR                            | 0.0043 |
| H2AFZ_imputed_Brain                    | 0.0043 | gene_enhancer_links_brain_enhcenter    | 0.0043 |
| H2AFZ_imputed_Neurosph                 | 0.0047 | gene_enhancer_links_neurosph_enhcenter | 0.0061 |
| H2AFZ_observed_Brain                   | 0.0052 | gpcr_union                             | 0.0035 |
| H3k27ac                                | 0.0049 | H2AFZ_imputed_Brain                    | 0.0045 |
| H3K27ac_imputed_Brain                  | 0.0046 | H2AFZ_imputed_Neurosph                 | 0.0060 |
| H3K27ac_imputed_Neurosph               | 0.0051 | H2AFZ_observed_Brain                   | 0.0056 |
| H3K27ac_observed_Brain                 | 0.0045 | H3k27ac                                | 0.0054 |
| H3K27ac_observed_Neurosph              | 0.0058 | H3K27ac_imputed_Brain                  | 0.0063 |
| H3K27me3_imputed_Brain                 | 0.0050 | H3K27ac_imputed_Neurosph               | 0.0066 |
| H3K27me3_imputed_Neurosph              | 0.0065 | H3K27ac_observed_Brain                 | 0.0047 |
| H3K27me3_observed_Brain                | 0.0067 | H3K27ac_observed_Neurosph              | 0.0062 |
| H3k4me1                                | 0.0061 | H3K27me3_imputed_Brain                 | 0.0051 |
| H3K4me1_imputed_Brain                  | 0.0041 | H3K27me3_imputed_Neurosph              | 0.0064 |
| H3K4me1_imputed_Neurosph               | 0.0053 | H3K27me3_observed_Brain                | 0.0077 |
| H3K4me1_observed_Brain                 | 0.0056 | H3k4me1                                | 0.0072 |
| H3K4me1_observed_Neurosph              | 0.0043 | H3K4me1_imputed_Brain                  | 0.0057 |
| H3K4me2_observed_Brain                 | 0.0052 | H3K4me1_imputed_Neurosph               | 0.0060 |
| H3k4me3                                | 0.0077 | H3K4me1_observed_Brain                 | 0.0058 |
| H3K4me3_imputed_Brain                  | 0.0061 | H3K4me1_observed_Neurosph              | 0.0053 |
| H3K4me3_imputed_Neurosph               | 0.0051 | H3K4me2_observed_Brain                 | 0.0053 |
| H3K4me3_observed_Brain                 | 0.0054 | H3k4me3                                | 0.0053 |
| H3K4me3_observed_Neurosph              | 0.0054 | H3K4me3_imputed_Brain                  | 0.0053 |

|                           |        |                           |        |
|---------------------------|--------|---------------------------|--------|
| H3K9ac_imputed_Brain      | 0.0055 | H3K4me3_imputed_Neurosph  | 0.0041 |
| H3K9ac_imputed_Neurosph   | 0.0055 | H3K4me3_observed_Brain    | 0.0068 |
| H3K9me3_imputed_Brain     | 0.0057 | H3K4me3_observed_Neurosph | 0.0065 |
| H3K9me3_imputed_Neurosph  | 0.0059 | H3K9ac_imputed_Brain      | 0.0050 |
| H3K9me3_observed_Brain    | 0.0055 | H3K9ac_imputed_Neurosph   | 0.0069 |
| H3K9me3_observed_Neurosph | 0.0047 | H3K9me3_imputed_Brain     | 0.0068 |
| H4K20me1_imputed_Neurosph | 0.0044 | H3K9me3_imputed_Neurosph  | 0.0066 |
| H4K20me1_observed_Brain   | 0.0050 | H3K9me3_observed_Brain    | 0.0066 |
| hacer_T1                  | 0.0051 | H3K9me3_observed_Neurosph | 0.0079 |
| HAR                       | 0.0044 | H4K20me1_imputed_Neurosph | 0.0055 |
| HetDomain                 | 0.0113 | H4K20me1_observed_Brain   | 0.0054 |
| HP_0000707                | 0.0034 | hacer_T1                  | 0.0063 |
| HP_0000708                | 0.0047 | HAR                       | 0.0053 |
| HP_0000717                | 0.0092 | HetDomain                 | 0.0069 |
| HP_0000729                | 0.0031 | HP_0000707                | 0.0041 |
| HP_0000752                | 0.0032 | HP_0000708                | 0.0046 |
| HP_0001197                | 0.0047 | HP_0000717                | 0.0045 |
| HP_0001250                | 0.0038 | HP_0000729                | 0.0053 |
| HP_0001507                | 0.0042 | HP_0000752                | 0.0056 |
| HP_0002011                | 0.0056 | HP_0001197                | 0.0045 |
| HP_0002715                | 0.0077 | HP_0001250                | 0.0026 |
| HP_0002960                | 0.0090 | HP_0001507                | 0.0058 |
| HP_0011446                | 0.0053 | HP_0002011                | 0.0043 |
| HP_0012443                | 0.0068 | HP_0002715                | 0.0045 |
| HP_0012638                | 0.0034 | HP_0002960                | 0.0040 |

|                                |        |                                |        |
|--------------------------------|--------|--------------------------------|--------|
| HP_0012639                     | 0.0051 | HP_0011446                     | 0.0063 |
| HP_0012759                     | 0.0074 | HP_0012443                     | 0.0028 |
| HP_0025031                     | 0.0045 | HP_0012638                     | 0.0045 |
| HP_0031466                     | 0.0055 | HP_0012639                     | 0.0029 |
| HP_0100022                     | 0.0065 | HP_0012759                     | 0.0058 |
| HP_0100753                     | ~0     | HP_0025031                     | 0.0079 |
| HP_0100852                     | 0.0043 | HP_0031466                     | 0.0058 |
| liu_csbj_targetgene            | 0.0052 | HP_0100022                     | 0.0035 |
| loss_of_function_score1        | 0.0059 | HP_0100753                     | 0.0046 |
| loss_of_function_score2        | 0.0033 | HP_0100852                     | 0.0052 |
| loss_of_function_score3        | 0.0055 | liu_csbj_targetgene            | 0.0050 |
| methMCRF                       | 0.0065 | methMCRF                       | 0.0075 |
| mgi_essential_gene             | 0.0044 | mgi_essential_gene             | 0.0139 |
| miRNA                          | 0.0049 | miRNA                          | 0.0053 |
| non-codingRNAs                 | 0.0058 | non-codingRNAs                 | 0.0049 |
| nonEssential_in_culture_CRISPR | 0.0047 | nonEssential_in_culture_CRISPR | 0.0043 |
| nott_Astrocyte_enhancers       | 0.0040 | nott_Astrocyte_enhancers       | 0.0051 |
| nott_Astrocyte_promoters       | 0.0045 | nott_Astrocyte_promoters       | 0.0063 |
| nott_H3K4me3_around_TSS        | 0.0060 | nott_H3K4me3_around_TSS        | 0.0056 |
| nott_Microglia_enhancers       | 0.0047 | nott_Microglia_enhancers       | 0.0051 |
| nott_Microglia_promoters       | 0.0057 | nott_Microglia_promoters       | 0.0052 |
| nott_Neuronal_enhancers        | 0.0123 | nott_Neuronal_enhancers        | 0.0109 |
| nott_Neuronal_promoters        | 0.0047 | nott_Neuronal_promoters        | 0.0054 |
| nott_Oligo_enhancers           | 0.0049 | nott_Oligo_enhancers           | 0.0058 |
| nott_Oligo_promoters           | 0.0061 | nott_Oligo_promoters           | 0.0048 |

|                               |        |                               |        |
|-------------------------------|--------|-------------------------------|--------|
| nott_superEnhancer            | ~0     | nott_superEnhancer            | ~0     |
| Olfactory_receptors_mainland  | 0.0068 | Olfactory_receptors_mainland  | 0.0025 |
| phastCons46way                | 0.0062 | phastCons46way                | 0.0070 |
| phyloP46way                   | 0.0051 | phyloP46way                   | 0.0057 |
| POLR2A_imputed_Neurosph       | 0.0067 | POLR2A_imputed_Neurosph       | 0.0043 |
| PsychENCODE_CBC_H3K27ac       | 0.0067 | PsychENCODE_CBC_H3K27ac       | 0.0049 |
| PsychENCODE_HiC_EP            | 0.0050 | PsychENCODE_HiC_EP            | 0.0046 |
| PsychENCODE_loops_interRegion | 0.0043 | PsychENCODE_loops_interRegion | 0.0043 |
| PsychENCODE_PEC_Enhancers     | 0.0104 | PsychENCODE_PEC_Enhancers     | 0.0079 |
| PsychENCODE_PFC_H3K27ac       | 0.0062 | PsychENCODE_PFC_H3K27ac       | 0.0047 |
| PsychENCODE_TAR               | 0.0058 | PsychENCODE_TAR               | 0.0052 |
| PsychENCODE_TC_H3K27ac        | 0.0047 | PsychENCODE_TC_H3K27ac        | 0.0047 |
| RAD21_imputed_Brain           | 0.0055 | RAD21_imputed_Brain           | 0.0061 |
| RAD21_imputed_Neurosph        | 0.0057 | RAD21_imputed_Neurosph        | 0.0060 |
| RoadmapDNasePromCount         | 0.0048 | RoadmapDNasePromCount         | 0.0049 |
| SE_ele                        | 0.0043 | SE_ele                        | 0.0052 |
| SEA00101                      | 0.0046 | SEA00101                      | 0.0056 |
| sfari_gene                    | 0.0046 | sfari_gene                    | 0.0043 |
| SMC3_imputed_Brain            | 0.0060 | SMC3_imputed_Brain            | 0.0054 |
| SMC3_imputed_Neurosph         | 0.0047 | SMC3_imputed_Neurosph         | 0.0069 |
| snp_selex                     | 0.0084 | snp_selex                     | 0.0045 |
| TAD56                         | 0.0079 | TAD56                         | 0.0072 |
| tss2000bp                     | 0.0178 | tss2000bp                     | 0.0146 |
| vista                         | 0.0047 | vista                         | 0.0045 |
| yue_loops_hippo               | 0.0051 | yue_loops_hippo               | 0.0066 |

## References

1. Hart T, Tong AHY, Chan K, et al. Evaluation and Design of Genome-Wide CRISPR/SpCas9 Knockout Screens. *G3 (Bethesda)* 2017;7:2719-27. doi: 10.1534/g3.117.041277
2. Karczewski KJ, Francioli LC, Tiao G, et al. The mutational constraint spectrum quantified from variation in 141,456 humans. *Nature* 2020;581:434-43. doi: 10.1038/s41586-020-2308-7
3. Strande NT, Riggs ER, Buchanan AH, et al. Evaluating the Clinical Validity of Gene-Disease Associations: An Evidence-Based Framework Developed by the Clinical Genome Resource. *Am J Hum Genet* 2017;100:895-906. doi: 10.1016/j.ajhg.2017.04.015
4. Wright CF, Fitzgerald TW, Jones WD, et al. Genetic diagnosis of developmental disorders in the DDD study: a scalable analysis of genome-wide research data. *Lancet* 2015;385:1305-14. doi: 10.1016/S0140-6736(14)61705-0
5. Collins RL, Glessner JT, Porcu E, et al. A cross-disorder dosage sensitivity map of the human genome. *Cell* 2022;185:3041-3055.e25. doi: 10.1101/2021.01.26.21250098
6. Wishart DS, Feunang YD, Guo AC, et al. DrugBank 5.0: a major update to the DrugBank database for 2018. *Nucleic Acids Res* 2018;46:D1074-D82. doi: 10.1093/nar/gkx1037
7. Motenko H, Neuhauser SB, O'Keefe M, et al. MouseMine: a new data warehouse for MGI. *Mamm Genome* 2015;26:325-30. doi: 10.1007/s00335-015-9573-z
8. Kohler S, Gargano M, Matentzoglou N, et al. The Human Phenotype Ontology in 2021. *Nucleic Acids Res* 2021;49:D1207-D17. doi: 10.1093/nar/gkaa1043
9. Braschi B, Denny P, Gray K, et al. Genenames.org: the HGNC and VGNC resources in 2019. *Nucleic Acids Res* 2019;47:D786-D92. doi: 10.1093/nar/gky930
10. Abrahams BS, Arking DE, Campbell DB, et al. SFARI Gene 2.0: a community-driven knowledgebase for the autism spectrum disorders (ASDs). *Mol Autism* 2013;4:36. doi: 10.1186/2040-2392-4-36
11. Ernst J, Kellis M. ChromHMM: automating chromatin-state discovery and characterization. *Nat Methods* 2012;9:215-6. doi: 10.1038/nmeth.1906
12. Boix CA, James BT, Park YP, et al. Regulatory genomic circuitry of human disease loci by integrative epigenomics. *Nature* 2021;590:300-07. doi: 10.1038/s41586-020-03145-z
13. Sabo PJ, Hawrylycz M, Wallace JC, et al. Discovery of functional noncoding elements by digital analysis of chromatin structure. *Proc Natl Acad Sci U.S.A.* 2004;101:16837-42. doi: 10.1073/pnas.0407387101
14. Davis CA, Hitz BC, Sloan CA, et al. The Encyclopedia of DNA elements (ENCODE): data portal update. *Nucleic Acids Res* 2018;46:D794-D801. doi: 10.1093/nar/gkx1081

15. Roadmap Epigenomics C, Kundaje A, Meuleman W, et al. Integrative analysis of 111 reference human epigenomes. *Nature* 2015;518:317-30. doi: 10.1038/nature14248
16. Nott A, Holtman IR, Coufal NG, et al. Brain cell type-specific enhancer-promoter interactome maps and disease-risk association. *Science* 2019;366:1134-39. doi: 10.1126/science.aay0793
17. Khan A, Zhang X. dbSUPER: a database of super-enhancers in mouse and human genome. *Nucleic Acids Res* 2016;44:D164-71. doi: 10.1093/nar/gkv1002
18. Gao T, Qian J. EnhancerAtlas 2.0: an updated resource with enhancer annotation in 586 tissue/cell types across nine species. *Nucleic Acids Res* 2020;48:D58-D64. doi: 10.1093/nar/gkz980
19. Andersson R, Gebhard C, Miguel-Escalada I, et al. An atlas of active enhancers across human cell types and tissues. *Nature* 2014;507:455-61. doi: 10.1038/nature12787
20. Wang J, Dai X, Berry LD, et al. HACER: an atlas of human active enhancers to interpret regulatory variants. *Nucleic Acids Res* 2019;47:D106-D12. doi: 10.1093/nar/gky864
21. Wang D, Liu S, Warrell J, et al. Comprehensive functional genomic resource and integrative model for the human brain. *Science* 2018;362:eaat8464. doi: 10.1126/science.aat8464
22. Jiang Y, Qian F, Bai X, et al. SEDb: a comprehensive human super-enhancer database. *Nucleic Acids Res* 2019;47:D235-D43. doi: 10.1093/nar/gky1025
23. Chen C, Zhou D, Gu Y, et al. SEA version 3.0: a comprehensive extension and update of the Super-Enhancer archive. *Nucleic Acids Res* 2020;48:D198-D203. doi: 10.1093/nar/gkz1028
24. Visel A, Minovitsky S, Dubchak I, et al. VISTA Enhancer Browser--a database of tissue-specific human enhancers. *Nucleic Acids Res* 2007;35:D88-92. doi: 10.1093/nar/gkl822
25. Harrow J, Frankish A, Gonzalez JM, et al. GENCODE: the reference human genome annotation for The ENCODE Project. *Genome Res* 2012;22:1760-74. doi: 10.1101/gr.135350.111
26. Liu X, Xu W, Leng F, et al. Prioritizing long range interactions in noncoding regions using GWAS and deletions perturbed TADs. *Comput Struct Biotechnol J* 2020;18:2945-52. doi: 10.1016/j.csbj.2020.10.014
27. Wang Y, Song F, Zhang B, et al. The 3D Genome Browser: a web-based browser for visualizing 3D genome organization and long-range chromatin interactions. *Genome Biol* 2018;19:151. doi: 10.1186/s13059-018-1519-9
28. Yan J, Qiu Y, Ribeiro Dos Santos AM, et al. Systematic analysis of binding of transcription factors to noncoding variants. *Nature* 2021;591:147-51. doi: 10.1038/s41586-021-03211-0

29. Karolchik D, Hinrichs AS, Furey TS, et al. The UCSC Table Browser data retrieval tool. *Nucleic Acids Res* 2004;32:D493-6. doi: 10.1093/nar/gkh103
30. Ho JW, Jung YL, Liu T, et al. Comparative analysis of metazoan chromatin organization. *Nature* 2014;512:449-52. doi: 10.1038/nature13415
31. Doan RN, Bae BI, Cubelos B, et al. Mutations in Human Accelerated Regions Disrupt Cognition and Social Behavior. *Cell* 2016;167:341-54 e12. doi: 10.1016/j.cell.2016.08.071
32. Harding SD, Sharman JL, Faccenda E, et al. The IUPHAR/BPS Guide to PHARMACOLOGY in 2018: updates and expansion to encompass the new guide to IMMUNOPHARMACOLOGY. *Nucleic Acids Res* 2018;46:D1091-D106. doi: 10.1093/nar/gkx1121
33. Alexander SP, Christopoulos A, Davenport AP, et al. THE CONCISE GUIDE TO PHARMACOLOGY 2017/18: G protein-coupled receptors. *Br J Pharmacol* 2017;174 Suppl 1:S17-S129. doi: 10.1111/bph.13878
34. Collins RL, Glessner JT, Porcu E, et al. A cross-disorder dosage sensitivity map of the human genome. *Cell* 2022;185:3041-55.e25. doi: 10.1016/j.cell.2022.06.036
35. UniProt Consortium T. UniProt: the universal protein knowledgebase. *Nucleic Acids Res* 2018;46:2699. doi: 10.1093/nar/gky092
36. Howe KL, Achuthan P, Allen J, et al. Ensembl 2021. *Nucleic Acids Res* 2021;49:D884-D91. doi: 10.1093/nar/gkaa942
